# Supplementary material
Source: publisher figshare collection journal article supplement (https://gsajournals.figshare.com/ndownloader/files/14094041)
Supplement: Supplementary file 1 [file 14094041]

uniqueRunID	worm	wormID	strain	reartemp	date	run	Droplet Temp (corrected)	TotalGoodFrames	Area	Fast Locomotion Index (LI1)	Slow Locomotion Index (LI7)	Min(Slow Locomotion Index)	Paralyzed (=0, motile=1)
wormd20150203s1AF16HAdrt23w01r00	0	AF16.1	AF16	23	2/03/15	0	25.03423265	282	407.456747	0.53712865	0.62394726	0.082356353	1
wormd20150203s1AF16HAdrt23w01r01	0	AF16.1	AF16	23	2/03/15	1	26.09545714	293	453.643333	0.532193	0.64555354	0.082356353	1
wormd20150203s1AF16HAdrt23w01r02	0	AF16.1	AF16	23	2/03/15	2	27.15668163	116	452.214876	0.59670973	0.6738232	0.082356353	1
wormd20150203s1AF16HAdrt23w01r03	0	AF16.1	AF16	23	2/03/15	3	28.21790612	176	413.117318	0.58509755	0.65687713	0.082356353	1
wormd20150203s1AF16HAdrt23w01r04	0	AF16.1	AF16	23	2/03/15	4	29.27913061	125	389.15625	0.35765953	0.68028911	0.082356353	1
wormd20150203s1AF16HAdrt23w01r05	0	AF16.1	AF16	23	2/03/15	5	30.3403551	169	387.248555	0.41964044	0.65640434	0.082356353	1
wormd20150203s1AF16HAdrt23w01r06	0	AF16.1	AF16	23	2/03/15	6	31.40157959	135	355.457143	0.48562376	0.49362696	0.082356353	1
wormd20150203s1AF16HAdrt23w01r07	0	AF16.1	AF16	23	2/03/15	7	32.46280408	131	381.947761	0.41224033	0.6356397	0.082356353	1
wormd20150203s1AF16HAdrt23w01r09	0	AF16.1	AF16	23	2/03/15	9	34.58525306	219	440.809735	0.26500192	0.72230668	0.082356353	1
wormd20150203s1AF16HAdrt23w01r10	0	AF16.1	AF16	23	2/03/15	10	35.64647755	221	390.946429	0.13407538	0.37072985	0.082356353	1
wormd20150203s1AF16HAdrt23w01r11	0	AF16.1	AF16	23	2/03/15	11	36.70770204	293	439.2	0.11089213	0.33367507	0.082356353	1
wormd20150203s1AF16HAdrt23w01r12	0	AF16.1	AF16	23	2/03/15	12	37.76892653	293	375.686667	0.08327992	0.08524935	0.082356353	0
wormd20150203s1AF16HAdrt23w01r13	0	AF16.1	AF16	23	2/03/15	13	38.83015102	293	382.83	0.08394994	0.08404796	0.082356353	0
wormd20150203s1AF16HAdrt23w01r14	0	AF16.1	AF16	23	2/03/15	14	39.89137551	293	380.496667	0.08638582	0.08774841	0.082356353	0
wormd20150203s1AF16HAdrt23w01r15	0	AF16.1	AF16	23	2/03/15	15	40.9526	293	402.583333	0.08156132	0.08235635	0.082356353	0
wormd20150203s1AF16HAdrt23w02r00	1	AF16.2	AF16	23	2/03/15	0	25.03423265	293	432.753333	0.55272972	0.6401567	0.083159865	1
wormd20150203s1AF16HAdrt23w02r01	1	AF16.2	AF16	23	2/03/15	1	26.09545714	140	413.69863	0.50859965	0.63279206	0.083159865	1
wormd20150203s1AF16HAdrt23w02r10	1	AF16.2	AF16	23	2/03/15	10	35.64647755	293	519.06	0.078329	0.14809369	0.083159865	1
wormd20150203s1AF16HAdrt23w02r11	1	AF16.2	AF16	23	2/03/15	11	36.70770204	293	469.246667	0.09651744	0.30366261	0.083159865	1
wormd20150203s1AF16HAdrt23w02r12	1	AF16.2	AF16	23	2/03/15	12	37.76892653	293	433.123333	0.08254802	0.09532607	0.083159865	0
wormd20150203s1AF16HAdrt23w02r13	1	AF16.2	AF16	23	2/03/15	13	38.83015102	293	440.26	0.08495628	0.09703952	0.083159865	0
wormd20150203s1AF16HAdrt23w02r14	1	AF16.2	AF16	23	2/03/15	14	39.89137551	293	434.553333	0.08397305	0.08315987	0.083159865	0
wormd20150203s1AF16HAdrt23w02r15	1	AF16.2	AF16	23	2/03/15	15	40.9526	293	409.56	0.08620626	0.08479224	0.083159865	0
wormd20150203s1AF16HAdrt23w03r00	2	AF16.3	AF16	23	2/03/15	0	25.03423265	293	523.97	0.44970192	0.54152146	0.070945886	1
wormd20150203s1AF16HAdrt23w03r01	2	AF16.3	AF16	23	2/03/15	1	26.09545714	161	489.335366	0.47736822	0.56885448	0.070945886	1
wormd20150203s1AF16HAdrt23w03r02	2	AF16.3	AF16	23	2/03/15	2	27.15668163	151	536.227273	0.43758227	0.57732063	0.070945886	1
wormd20150203s1AF16HAdrt23w03r03	2	AF16.3	AF16	23	2/03/15	3	28.21790612	215	539.285714	0.48861629	0.61983398	0.070945886	1
wormd20150203s1AF16HAdrt23w03r04	2	AF16.3	AF16	23	2/03/15	4	29.27913061	117	558.823944	0.39723023	0.6173605	0.070945886	1
wormd20150203s1AF16HAdrt23w03r05	2	AF16.3	AF16	23	2/03/15	5	30.3403551	217	505.886957	0.49887668	0.67298382	0.070945886	1
wormd20150203s1AF16HAdrt23w03r06	2	AF16.3	AF16	23	2/03/15	6	31.40157959	127	536.477612	0.46674076	0.6260218	0.070945886	1
wormd20150203s1AF16HAdrt23w03r07	2	AF16.3	AF16	23	2/03/15	7	32.46280408	155	509.493827	0.41462428	0.55294137	0.070945886	1
wormd20150203s1AF16HAdrt23w03r09	2	AF16.3	AF16	23	2/03/15	9	34.58525306	278	480.685121	0.08247825	0.16174601	0.070945886	1
wormd20150203s1AF16HAdrt23w03r11	2	AF16.3	AF16	23	2/03/15	11	36.70770204	125	534.611354	0.07389545	0.17252803	0.070945886	1
wormd20150203s1AF16HAdrt23w03r12	2	AF16.3	AF16	23	2/03/15	12	37.76892653	293	555.996667	0.07477223	0.09424236	0.070945886	0
wormd20150203s1AF16HAdrt23w03r13	2	AF16.3	AF16	23	2/03/15	13	38.83015102	293	563.586667	0.07232077	0.07247364	0.070945886	0
wormd20150203s1AF16HAdrt23w03r14	2	AF16.3	AF16	23	2/03/15	14	39.89137551	293	554.236667	0.0706463	0.07094589	0.070945886	0
wormd20150203s1AF16HAdrt23w03r15	2	AF16.3	AF16	23	2/03/15	15	40.9526	293	548.263333	0.07567174	0.07571233	0.070945886	0
wormd20150203s1AF16HAdrt23w07r00	6	AF16.4	AF16	23	2/03/15	0	25.03423265	293	514.99	0.3863552	0.62545362	0.074772404	1
wormd20150203s1AF16HAdrt23w07r01	6	AF16.4	AF16	23	2/03/15	1	26.09545714	104	481.828829	0.43059269	0.58132248	0.074772404	1
wormd20150203s1AF16HAdrt23w07r02	6	AF16.4	AF16	23	2/03/15	2	27.15668163	192	424.532995	0.41819644	0.48592355	0.074772404	1
wormd20150203s1AF16HAdrt23w07r03	6	AF16.4	AF16	23	2/03/15	3	28.21790612	160	548.993827	0.38705217	0.53346131	0.074772404	1
wormd20150203s1AF16HAdrt23w07r05	6	AF16.4	AF16	23	2/03/15	5	30.3403551	103	565.085714	0.37313371	0.55836819	0.074772404	1
wormd20150203s1AF16HAdrt23w07r06	6	AF16.4	AF16	23	2/03/15	6	31.40157959	132	596.605839	0.34464483	0.56350818	0.074772404	1
wormd20150203s1AF16HAdrt23w07r07	6	AF16.4	AF16	23	2/03/15	7	32.46280408	124	234.946565	0.07529796	0.1161468	0.074772404	0
wormd20150203s1AF16HAdrt23w07r09	6	AF16.4	AF16	23	2/03/15	9	34.58525306	268	546.567273	0.20670608	0.61059618	0.074772404	1
wormd20150203s1AF16HAdrt23w07r10	6	AF16.4	AF16	23	2/03/15	10	35.64647755	139	556.973154	0.22266485	0.61707468	0.074772404	1
wormd20150203s1AF16HAdrt23w07r11	6	AF16.4	AF16	23	2/03/15	11	36.70770204	163	555.252475	0.1294043	0.4751223	0.074772404	1
wormd20150203s1AF16HAdrt23w07r12	6	AF16.4	AF16	23	2/03/15	12	37.76892653	293	572.153333	0.08724214	0.11293833	0.074772404	0
wormd20150203s1AF16HAdrt23w07r13	6	AF16.4	AF16	23	2/03/15	13	38.83015102	293	563.463333	0.07687892	0.07852706	0.074772404	0
wormd20150203s1AF16HAdrt23w07r14	6	AF16.4	AF16	23	2/03/15	14	39.89137551	293	556.66	0.07468258	0.0747724	0.074772404	0
wormd20150203s1AF16HAdrt23w07r15	6	AF16.4	AF16	23	2/03/15	15	40.9526	293	558.02	0.07904462	0.07894195	0.074772404	0
wormd20150203s1AF16HAdrt23w08r00	7	AF16.5	AF16	23	2/03/15	0	25.03423265	209	426	0.51265814	0.59845972	0.068280727	1
wormd20150203s1AF16HAdrt23w08r05	7	AF16.5	AF16	23	2/03/15	5	30.3403551	137	248.429577	0.08985958	0.14980736	0.068280727	1
wormd20150203s1AF16HAdrt23w08r10	7	AF16.5	AF16	23	2/03/15	10	35.64647755	293	504.2	0.11403684	0.36924097	0.068280727	1
wormd20150203s1AF16HAdrt23w08r11	7	AF16.5	AF16	23	2/03/15	11	36.70770204	292	468.852843	0.095717	0.28517342	0.068280727	1
wormd20150203s1AF16HAdrt23w08r12	7	AF16.5	AF16	23	2/03/15	12	37.76892653	293	546.6	0.07238918	0.12747972	0.068280727	0
wormd20150203s1AF16HAdrt23w08r13	7	AF16.5	AF16	23	2/03/15	13	38.83015102	293	526.98	0.06698261	0.06828073	0.068280727	0
wormd20150203s1AF16HAdrt23w08r14	7	AF16.5	AF16	23	2/03/15	14	39.89137551	293	490.06	0.0725347	0.07646053	0.068280727	0
wormd20150203s1AF16HAdrt23w08r15	7	AF16.5	AF16	23	2/03/15	15	40.9526	293	455.673333	0.08041469	0.08204077	0.068280727	0
wormd20150203s1AF16HAdrt23w09r00	8	AF16.6	AF16	23	2/03/15	0	25.03423265	252	325.868726	0.46326632	0.53525401	0.17919815	1
wormd20150203s1AF16HAdrt23w09r01	8	AF16.6	AF16	23	2/03/15	1	26.09545714	276	390.691489	0.59236454	0.71747319	0.17919815	1
wormd20150203s1AF16HAdrt23w09r02	8	AF16.6	AF16	23	2/03/15	2	27.15668163	133	373.618705	0.50320661	0.6565325	0.17919815	1
wormd20150203s1AF16HAdrt23w09r03	8	AF16.6	AF16	23	2/03/15	3	28.21790612	117	220.7	0.22021698	0.32358424	0.17919815	1
wormd20150203s1AF16HAdrt23w09r05	8	AF16.6	AF16	23	2/03/15	5	30.3403551	101	247.122642	0.24033776	0.32981504	0.17919815	1
wormd20150203s1AF16HAdrt23w09r06	8	AF16.6	AF16	23	2/03/15	6	31.40157959	140	180.777778	0.08935337	0.17919815	0.17919815	1
wormd20150203s1AF16HAdrt23w09r07	8	AF16.6	AF16	23	2/03/15	7	32.46280408	193	413.883249	0.2367562	0.65728507	0.17919815	1
wormd20150203s1AF16HAdrt23w09r14	8	AF16.6	AF16	23	2/03/15	14	39.89137551	162	91.9882353	0.20498995	0.2119257	0.17919815	1
wormd20150203s1AF16HAdrt23w09r15	8	AF16.6	AF16	23	2/03/15	15	40.9526	204	96.3822222	0.19616584	0.19908397	0.17919815	1
wormd20150203s1AF16HAdrt23w13r00	12	AF16.7	AF16	23	2/03/15	0	25.03423265	287	434.952381	0.52021985	0.59514068	0.033875755	1
wormd20150203s1AF16HAdrt23w13r02	12	AF16.7	AF16	23	2/03/15	2	27.15668163	110	434.940171	0.51652073	0.60574148	0.033875755	1
wormd20150203s1AF16HAdrt23w13r04	12	AF16.7	AF16	23	2/03/15	4	29.27913061	108	411.46789	0.44967223	0.56087504	0.033875755	1
wormd20150203s1AF16HAdrt23w13r07	12	AF16.7	AF16	23	2/03/15	7	32.46280408	217	447.928571	0.35277232	0.48287378	0.033875755	1
wormd20150203s1AF16HAdrt23w13r08	12	AF16.7	AF16	23	2/03/15	8	33.52402857	143	344.344828	0.25732149	0.55712895	0.033875755	1
wormd20150203s1AF16HAdrt23w13r09	12	AF16.7	AF16	23	2/03/15	9	34.58525306	132	341.194245	0.16700146	0.37601933	0.033875755	1
wormd20150203s1AF16HAdrt23w13r10	12	AF16.7	AF16	23	2/03/15	10	35.64647755	263	349.459259	0.08039737	0.11350326	0.033875755	0
wormd20150203s1AF16HAdrt23w13r11	12	AF16.7	AF16	23	2/03/15	11	36.70770204	113	91.8016529	0.0346966	0.03716377	0.033875755	0
wormd20150203s1AF16HAdrt23w13r12	12	AF16.7	AF16	23	2/03/15	12	37.76892653	293	409.273333	0.09844024	0.1588701	0.033875755	1
wormd20150203s1AF16HAdrt23w13r13	12	AF16.7	AF16	23	2/03/15	13	38.83015102	149	140.692	0.0399905	0.03956202	0.033875755	0
wormd20150203s1AF16HAdrt23w13r14	12	AF16.7	AF16	23	2/03/15	14	39.89137551	199	124.191406	0.0348915	0.03387575	0.033875755	0
wormd20150203s1AF16HAdrt23w14r00	13	AF16.8	AF16	23	2/03/15	0	25.03423265	168	242.596491	0.24106965	0.31051788	0.094333475	1
wormd20150203s1AF16HAdrt23w14r08	13	AF16.8	AF16	23	2/03/15	8	33.52402857	293	455.5	0.10828041	0.11313487	0.094333475	0
wormd20150203s1AF16HAdrt23w14r09	13	AF16.8	AF16	23	2/03/15	9	34.58525306	265	439.158088	0.12597889	0.37401636	0.094333475	1
wormd20150203s1AF16HAdrt23w14r10	13	AF16.8	AF16	23	2/03/15	10	35.64647755	254	510.559387	0.09939472	0.23356094	0.094333475	1
wormd20150203s1AF16HAdrt23w14r11	13	AF16.8	AF16	23	2/03/15	11	36.70770204	293	491.483333	0.09913545	0.13549709	0.094333475	0
wormd20150203s1AF16HAdrt23w14r12	13	AF16.8	AF16	23	2/03/15	12	37.76892653	293	461.386667	0.10500442	0.12394192	0.094333475	0
wormd20150203s1AF16HAdrt23w14r13	13	AF16.8	AF16	23	2/03/15	13	38.83015102	293	477.87	0.10183918	0.10248527	0.094333475	0
wormd20150203s1AF16HAdrt23w14r14	13	AF16.8	AF16	23	2/03/15	14	39.89137551	293	474.563333	0.09482855	0.09433347	0.094333475	0
wormd20150203s1AF16HAdrt23w14r15	13	AF16.8	AF16	23	2/03/15	15	40.9526	293	475.3	0.09938939	0.09869435	0.094333475	0
wormd20150203s1AF16HAdrt23w15r00	14	AF16.9	AF16	23	2/03/15	0	25.03423265	293	568.703333	0.40717259	0.6307354	0.089274256	1
wormd20150203s1AF16HAdrt23w15r02	14	AF16.9	AF16	23	2/03/15	2	27.15668163	166	635.724868	0.47644961	0.61502508	0.089274256	1
wormd20150203s1AF16HAdrt23w15r05	14	AF16.9	AF16	23	2/03/15	5	30.3403551	210	563.529148	0.40342554	0.60982308	0.089274256	1
wormd20150203s1AF16HAdrt23w15r10	14	AF16.9	AF16	23	2/03/15	10	35.64647755	293	551.793333	0.11812343	0.35672946	0.089274256	1
wormd20150203s1AF16HAdrt23w15r11	14	AF16.9	AF16	23	2/03/15	11	36.70770204	248	539.929104	0.10693213	0.20942509	0.089274256	1
wormd20150203s1AF16HAdrt23w15r12	14	AF16.9	AF16	23	2/03/15	12	37.76892653	293	534.596667	0.10082477	0.11811603	0.089274256	0
wormd20150203s1AF16HAdrt23w15r13	14	AF16.9	AF16	23	2/03/15	13	38.83015102	293	517.633333	0.09786546	0.09845201	0.089274256	0
wormd20150203s1AF16HAdrt23w15r14	14	AF16.9	AF16	23	2/03/15	14	39.89137551	293	533.723333	0.09723141	0.09756348	0.089274256	0
wormd20150203s1AF16HAdrt23w15r15	14	AF16.9	AF16	23	2/03/15	15	40.9526	293	549.42	0.08899501	0.08927426	0.089274256	0
wormd20150203s2AF16HK104rt23w01r00	0	AF16.10	AF16	23	2/03/15	0	25.03423265	284	324.19244	0.68538156	0.73399382	0.08405083	1
wormd20150203s2AF16HK104rt23w01r01	0	AF16.10	AF16	23	2/03/15	1	26.09545714	291	353.255034	0.65370517	0.74924188	0.08405083	1
wormd20150203s2AF16HK104rt23w01r02	0	AF16.10	AF16	23	2/03/15	2	27.15668163	275	352.255319	0.64486602	0.76331098	0.08405083	1
wormd20150203s2AF16HK104rt23w01r03	0	AF16.10	AF16	23	2/03/15	3	28.21790612	240	338.947154	0.58636734	0.78567307	0.08405083	1
wormd20150203s2AF16HK104rt23w01r04	0	AF16.10	AF16	23	2/03/15	4	29.27913061	192	349.210256	0.62407908	0.8168704	0.08405083	1
wormd20150203s2AF16HK104rt23w01r05	0	AF16.10	AF16	23	2/03/15	5	30.3403551	177	356.026455	0.63916663	0.79692153	0.08405083	1
wormd20150203s2AF16HK104rt23w01r06	0	AF16.10	AF16	23	2/03/15	6	31.40157959	241	373.644269	0.43730201	0.67417713	0.08405083	1
wormd20150203s2AF16HK104rt23w01r07	0	AF16.10	AF16	23	2/03/15	7	32.46280408	233	339.958333	0.55697617	0.73332694	0.08405083	1
wormd20150203s2AF16HK104rt23w01r09	0	AF16.10	AF16	23	2/03/15	9	34.58525306	293	322.01	0.10577128	0.12604425	0.08405083	0
wormd20150203s2AF16HK104rt23w01r10	0	AF16.10	AF16	23	2/03/15	10	35.64647755	293	289.103333	0.09155101	0.2222068	0.08405083	1
wormd20150203s2AF16HK104rt23w01r11	0	AF16.10	AF16	23	2/03/15	11	36.70770204	293	270.083333	0.08657102	0.12439778	0.08405083	0
wormd20150203s2AF16HK104rt23w01r12	0	AF16.10	AF16	23	2/03/15	12	37.76892653	293	276.403333	0.07997797	0.08405083	0.08405083	0
wormd20150203s2AF16HK104rt23w01r13	0	AF16.10	AF16	23	2/03/15	13	38.83015102	293	315.566667	0.09430464	0.0992762	0.08405083	0
wormd20150203s2AF16HK104rt23w02r00	1	AF16.11	AF16	23	2/03/15	0	25.03423265	293	487.91	0.46147488	0.55874729	0.119290165	1
wormd20150203s2AF16HK104rt23w02r01	1	AF16.11	AF16	23	2/03/15	1	26.09545714	172	440.68	0.45019951	0.54724836	0.119290165	1
wormd20150203s2AF16HK104rt23w02r09	1	AF16.11	AF16	23	2/03/15	9	34.58525306	271	373.880702	0.10476293	0.11929016	0.119290165	0
wormd20150203s2AF16HK104rt23w03r00	2	AF16.12	AF16	23	2/03/15	0	25.03423265	293	548.92	0.49314228	0.52824965	0.032168762	1
wormd20150203s2AF16HK104rt23w03r01	2	AF16.12	AF16	23	2/03/15	1	26.09545714	265	546.691176	0.48494815	0.57734836	0.032168762	1
wormd20150203s2AF16HK104rt23w03r02	2	AF16.12	AF16	23	2/03/15	2	27.15668163	173	531.207865	0.35180359	0.5341498	0.032168762	1
wormd20150203s2AF16HK104rt23w03r03	2	AF16.12	AF16	23	2/03/15	3	28.21790612	266	555.871795	0.53503902	0.59154528	0.032168762	1
wormd20150203s2AF16HK104rt23w03r04	2	AF16.12	AF16	23	2/03/15	4	29.27913061	214	586.100917	0.47767896	0.54682867	0.032168762	1
wormd20150203s2AF16HK104rt23w03r05	2	AF16.12	AF16	23	2/03/15	5	30.3403551	117	536.512195	0.4552552	0.55803088	0.032168762	1
wormd20150203s2AF16HK104rt23w03r06	2	AF16.12	AF16	23	2/03/15	6	31.40157959	141	510.931507	0.35719082	0.6949973	0.032168762	1
wormd20150203s2AF16HK104rt23w03r07	2	AF16.12	AF16	23	2/03/15	7	32.46280408	145	113.563758	0.01677237	0.03216876	0.032168762	0
wormd20150203s2AF16HK104rt23w03r08	2	AF16.12	AF16	23	2/03/15	8	33.52402857	281	565.020833	0.24621371	0.64294773	0.032168762	1
wormd20150203s2AF16HK104rt23w03r09	2	AF16.12	AF16	23	2/03/15	9	34.58525306	293	618.36	0.07037364	0.1149969	0.032168762	0
wormd20150203s2AF16HK104rt23w03r10	2	AF16.12	AF16	23	2/03/15	10	35.64647755	293	537.426667	0.08632386	0.12942335	0.032168762	0
wormd20150203s2AF16HK104rt23w03r11	2	AF16.12	AF16	23	2/03/15	11	36.70770204	293	532.583333	0.08560668	0.12714997	0.032168762	0
wormd20150203s2AF16HK104rt23w03r12	2	AF16.12	AF16	23	2/03/15	12	37.76892653	293	509.116667	0.08098924	0.08270886	0.032168762	0
wormd20150203s2AF16HK104rt23w03r13	2	AF16.12	AF16	23	2/03/15	13	38.83015102	293	495.576667	0.07941269	0.07952767	0.032168762	0
wormd20150203s2AF16HK104rt23w03r14	2	AF16.12	AF16	23	2/03/15	14	39.89137551	293	490.616667	0.07632297	0.07650583	0.032168762	0
wormd20150203s2AF16HK104rt23w03r15	2	AF16.12	AF16	23	2/03/15	15	40.9526	293	487.063333	0.08195948	0.08263985	0.032168762	0
wormd20150203s2AF16HK104rt23w07r00	6	AF16.13	AF16	23	2/03/15	0	25.03423265	292	595.270903	0.34712277	0.51662068	0.097980087	1
wormd20150203s2AF16HK104rt23w07r01	6	AF16.13	AF16	23	2/03/15	1	26.09545714	262	554.565693	0.41188969	0.41348438	0.097980087	1
wormd20150203s2AF16HK104rt23w07r02	6	AF16.13	AF16	23	2/03/15	2	27.15668163	224	572.54065	0.39422404	0.4960902	0.097980087	1
wormd20150203s2AF16HK104rt23w07r03	6	AF16.13	AF16	23	2/03/15	3	28.21790612	183	585.527778	0.44481573	0.49118287	0.097980087	1
wormd20150203s2AF16HK104rt23w07r04	6	AF16.13	AF16	23	2/03/15	4	29.27913061	270	526.482877	0.48422484	0.58161216	0.097980087	1
wormd20150203s2AF16HK104rt23w07r06	6	AF16.13	AF16	23	2/03/15	6	31.40157959	242	593.5	0.39274078	0.66323973	0.097980087	1
wormd20150203s2AF16HK104rt23w07r07	6	AF16.13	AF16	23	2/03/15	7	32.46280408	121	520.273438	0.25594135	0.70869958	0.097980087	1
wormd20150203s2AF16HK104rt23w07r08	6	AF16.13	AF16	23	2/03/15	8	33.52402857	217	497.590909	0.10816812	0.13359681	0.097980087	0
wormd20150203s2AF16HK104rt23w07r09	6	AF16.13	AF16	23	2/03/15	9	34.58525306	270	501.676364	0.10678519	0.3679171	0.097980087	1
wormd20150203s2AF16HK104rt23w07r10	6	AF16.13	AF16	23	2/03/15	10	35.64647755	278	426.350877	0.10577318	0.2586792	0.097980087	1
wormd20150203s2AF16HK104rt23w07r11	6	AF16.13	AF16	23	2/03/15	11	36.70770204	290	397.810169	0.10504253	0.16687509	0.097980087	1
wormd20150203s2AF16HK104rt23w07r12	6	AF16.13	AF16	23	2/03/15	12	37.76892653	293	409.39	0.10109474	0.09987	0.097980087	0
wormd20150203s2AF16HK104rt23w07r13	6	AF16.13	AF16	23	2/03/15	13	38.83015102	293	415.06	0.09699261	0.09798009	0.097980087	0
wormd20150203s2AF16HK104rt23w07r14	6	AF16.13	AF16	23	2/03/15	14	39.89137551	293	396.183333	0.10424537	0.10256933	0.097980087	0
wormd20150203s2AF16HK104rt23w07r15	6	AF16.13	AF16	23	2/03/15	15	40.9526	293	432.003333	0.11220454	0.11176599	0.097980087	0
wormd20150203s2AF16HK104rt23w08r00	7	AF16.14	AF16	23	2/03/15	0	25.03423265	290	449.73064	0.44978382	0.53288427	0.076554276	1
wormd20150203s2AF16HK104rt23w08r01	7	AF16.14	AF16	23	2/03/15	1	26.09545714	273	468.891697	0.44919639	0.53985127	0.076554276	1
wormd20150203s2AF16HK104rt23w08r04	7	AF16.14	AF16	23	2/03/15	4	29.27913061	137	451.993151	0.35021045	0.57915509	0.076554276	1
wormd20150203s2AF16HK104rt23w08r06	7	AF16.14	AF16	23	2/03/15	6	31.40157959	284	418.353952	0.42376536	0.67429612	0.076554276	1
wormd20150203s2AF16HK104rt23w08r07	7	AF16.14	AF16	23	2/03/15	7	32.46280408	114	458	0.19858138	0.50618409	0.076554276	1
wormd20150203s2AF16HK104rt23w08r08	7	AF16.14	AF16	23	2/03/15	8	33.52402857	192	427.85514	0.13402377	0.37979412	0.076554276	1
wormd20150203s2AF16HK104rt23w08r09	7	AF16.14	AF16	23	2/03/15	9	34.58525306	182	453.690722	0.07604355	0.09287757	0.076554276	0
wormd20150203s2AF16HK104rt23w08r10	7	AF16.14	AF16	23	2/03/15	10	35.64647755	236	484.349794	0.09374211	0.16398335	0.076554276	1
wormd20150203s2AF16HK104rt23w08r11	7	AF16.14	AF16	23	2/03/15	11	36.70770204	293	413.586667	0.07610895	0.09260259	0.076554276	0
wormd20150203s2AF16HK104rt23w08r12	7	AF16.14	AF16	23	2/03/15	12	37.76892653	293	365.356667	0.07767709	0.07810155	0.076554276	0
wormd20150203s2AF16HK104rt23w08r13	7	AF16.14	AF16	23	2/03/15	13	38.83015102	293	371.71	0.07692236	0.07655428	0.076554276	0
wormd20150203s2AF16HK104rt23w08r14	7	AF16.14	AF16	23	2/03/15	14	39.89137551	293	377.13	0.08298259	0.08187994	0.076554276	0
wormd20150203s2AF16HK104rt23w08r15	7	AF16.14	AF16	23	2/03/15	15	40.9526	293	378.903333	0.08765069	0.08801673	0.076554276	0
wormd20150203s2AF16HK104rt23w09r00	8	AF16.15	AF16	23	2/03/15	0	25.03423265	292	478.247492	0.3982342	0.65458573	0.083061083	1
wormd20150203s2AF16HK104rt23w09r10	8	AF16.15	AF16	23	2/03/15	10	35.64647755	124	469.48855	0.09206138	0.13929571	0.083061083	0
wormd20150203s2AF16HK104rt23w09r12	8	AF16.15	AF16	23	2/03/15	12	37.76892653	110	476.188034	0.08380466	0.08693794	0.083061083	0
wormd20150203s2AF16HK104rt23w09r13	8	AF16.15	AF16	23	2/03/15	13	38.83015102	124	456.265625	0.08363882	0.0845222	0.083061083	0
wormd20150203s2AF16HK104rt23w09r14	8	AF16.15	AF16	23	2/03/15	14	39.89137551	248	445.196787	0.08395344	0.08530868	0.083061083	0
wormd20150203s2AF16HK104rt23w09r15	8	AF16.15	AF16	23	2/03/15	15	40.9526	293	445.166667	0.08198506	0.08306108	0.083061083	0
wormd20150203s2AF16HK104rt23w13r00	12	AF16.16	AF16	23	2/03/15	0	25.03423265	235	529.545833	0.40530574	0.47124755	0.07931618	1
wormd20150203s2AF16HK104rt23w13r01	12	AF16.16	AF16	23	2/03/15	1	26.09545714	273	582.734483	0.42384351	0.52637545	0.07931618	1
wormd20150203s2AF16HK104rt23w13r02	12	AF16.16	AF16	23	2/03/15	2	27.15668163	277	531.728571	0.43867704	0.54885906	0.07931618	1
wormd20150203s2AF16HK104rt23w13r03	12	AF16.16	AF16	23	2/03/15	3	28.21790612	206	614.679012	0.45445757	0.5806217	0.07931618	1
wormd20150203s2AF16HK104rt23w13r04	12	AF16.16	AF16	23	2/03/15	4	29.27913061	139	460.651316	0.35369098	0.45999168	0.07931618	1
wormd20150203s2AF16HK104rt23w13r05	12	AF16.16	AF16	23	2/03/15	5	30.3403551	177	603.516279	0.44927355	0.56691768	0.07931618	1
wormd20150203s2AF16HK104rt23w13r06	12	AF16.16	AF16	23	2/03/15	6	31.40157959	121	423.790698	0.36574052	0.4445655	0.07931618	1
wormd20150203s2AF16HK104rt23w13r07	12	AF16.16	AF16	23	2/03/15	7	32.46280408	123	416.637795	0.26736922	0.32710753	0.07931618	1
wormd20150203s2AF16HK104rt23w13r08	12	AF16.16	AF16	23	2/03/15	8	33.52402857	143	429.827586	0.3193728	0.43388949	0.07931618	1
wormd20150203s2AF16HK104rt23w13r09	12	AF16.16	AF16	23	2/03/15	9	34.58525306	293	603.766667	0.10721281	0.17810979	0.07931618	1
wormd20150203s2AF16HK104rt23w13r10	12	AF16.16	AF16	23	2/03/15	10	35.64647755	293	621.673333	0.09014598	0.18116969	0.07931618	1
wormd20150203s2AF16HK104rt23w13r11	12	AF16.16	AF16	23	2/03/15	11	36.70770204	266	681.621429	0.0868337	0.11882184	0.07931618	0
wormd20150203s2AF16HK104rt23w13r12	12	AF16.16	AF16	23	2/03/15	12	37.76892653	293	544.87	0.08889006	0.09002385	0.07931618	0
wormd20150203s2AF16HK104rt23w13r13	12	AF16.16	AF16	23	2/03/15	13	38.83015102	293	541.496667	0.07833089	0.07931618	0.07931618	0
wormd20150203s2AF16HK104rt23w13r14	12	AF16.16	AF16	23	2/03/15	14	39.89137551	293	554.716667	0.08155764	0.08006862	0.07931618	0
wormd20150203s2AF16HK104rt23w13r15	12	AF16.16	AF16	23	2/03/15	15	40.9526	293	581.253333	0.08277987	0.08146272	0.07931618	0
wormd20150203s2AF16HK104rt23w14r00	13	AF16.17	AF16	23	2/03/15	0	25.03423265	292	429.622074	0.48620163	0.60562155	0.079314725	1
wormd20150203s2AF16HK104rt23w14r01	13	AF16.17	AF16	23	2/03/15	1	26.09545714	272	380.494624	0.57207165	0.62707279	0.079314725	1
wormd20150203s2AF16HK104rt23w14r02	13	AF16.17	AF16	23	2/03/15	2	27.15668163	285	426.256849	0.54906387	0.70323869	0.079314725	1
wormd20150203s2AF16HK104rt23w14r03	13	AF16.17	AF16	23	2/03/15	3	28.21790612	166	438.48538	0.51752343	0.62956695	0.079314725	1
wormd20150203s2AF16HK104rt23w14r05	13	AF16.17	AF16	23	2/03/15	5	30.3403551	117	422.520325	0.48123507	0.7161401	0.079314725	1
wormd20150203s2AF16HK104rt23w14r06	13	AF16.17	AF16	23	2/03/15	6	31.40157959	103	378.863636	0.44011429	0.65366023	0.079314725	1
wormd20150203s2AF16HK104rt23w14r07	13	AF16.17	AF16	23	2/03/15	7	32.46280408	256	436.121673	0.57167609	0.67420217	0.079314725	1
wormd20150203s2AF16HK104rt23w14r08	13	AF16.17	AF16	23	2/03/15	8	33.52402857	100	375.747664	0.29645805	0.61924156	0.079314725	1
wormd20150203s2AF16HK104rt23w14r09	13	AF16.17	AF16	23	2/03/15	9	34.58525306	293	402.423333	0.08813732	0.14749215	0.079314725	1
wormd20150203s2AF16HK104rt23w14r10	13	AF16.17	AF16	23	2/03/15	10	35.64647755	293	454.656667	0.0839914	0.18525975	0.079314725	1
wormd20150203s2AF16HK104rt23w14r11	13	AF16.17	AF16	23	2/03/15	11	36.70770204	293	405.223333	0.08244079	0.09596012	0.079314725	0
wormd20150203s2AF16HK104rt23w14r12	13	AF16.17	AF16	23	2/03/15	12	37.76892653	293	380.583333	0.07709173	0.07931472	0.079314725	0
wormd20150203s2AF16HK104rt23w14r13	13	AF16.17	AF16	23	2/03/15	13	38.83015102	293	391.063333	0.08102957	0.08240076	0.079314725	0
wormd20150203s2AF16HK104rt23w14r14	13	AF16.17	AF16	23	2/03/15	14	39.89137551	293	408.34	0.09079724	0.09063433	0.079314725	0
wormd20150203s2AF16HK104rt23w14r15	13	AF16.17	AF16	23	2/03/15	15	40.9526	293	419.873333	0.08523988	0.08546531	0.079314725	0
wormd20150203s2AF16HK104rt23w15r00	14	AF16.18	AF16	23	2/03/15	0	25.03423265	292	372.745819	0.52023756	0.70802693	0.103206447	1
wormd20150203s2AF16HK104rt23w15r01	14	AF16.18	AF16	23	2/03/15	1	26.09545714	178	361.864865	0.59069026	0.73371023	0.103206447	1
wormd20150203s2AF16HK104rt23w15r02	14	AF16.18	AF16	23	2/03/15	2	27.15668163	191	407.591837	0.49921045	0.61680732	0.103206447	1
wormd20150203s2AF16HK104rt23w15r03	14	AF16.18	AF16	23	2/03/15	3	28.21790612	233	394.416667	0.57570933	0.63417416	0.103206447	1
wormd20150203s2AF16HK104rt23w15r04	14	AF16.18	AF16	23	2/03/15	4	29.27913061	104	396.660377	0.52729615	0.72660881	0.103206447	1
wormd20150203s2AF16HK104rt23w15r06	14	AF16.18	AF16	23	2/03/15	6	31.40157959	213	382.963134	0.39869661	0.79085099	0.103206447	1
wormd20150203s2AF16HK104rt23w15r08	14	AF16.18	AF16	23	2/03/15	8	33.52402857	260	352.951311	0.13206137	0.30537472	0.103206447	1
wormd20150203s2AF16HK104rt23w15r09	14	AF16.18	AF16	23	2/03/15	9	34.58525306	222	314.272321	0.09618272	0.15221349	0.103206447	1
wormd20150203s2AF16HK104rt23w15r10	14	AF16.18	AF16	23	2/03/15	10	35.64647755	213	388.163636	0.10343643	0.15097242	0.103206447	1
wormd20150203s2AF16HK104rt23w15r11	14	AF16.18	AF16	23	2/03/15	11	36.70770204	293	368.033333	0.10941602	0.17456596	0.103206447	1
wormd20150203s2AF16HK104rt23w15r12	14	AF16.18	AF16	23	2/03/15	12	37.76892653	293	309.653333	0.09895294	0.10320645	0.103206447	0
wormd20150203s2AF16HK104rt23w15r13	14	AF16.18	AF16	23	2/03/15	13	38.83015102	129	316.992537	0.11048225	0.10766667	0.103206447	0
wormd20150203s3AHdAF16rt23w04r00	3	AF16.19	AF16	23	2/03/15	0	25.03423265	264	422.063197	0.59206106	0.62091942	0.060403511	1
wormd20150203s3AHdAF16rt23w04r01	3	AF16.19	AF16	23	2/03/15	1	26.09545714	293	478.063333	0.56350021	0.65523798	0.060403511	1
wormd20150203s3AHdAF16rt23w04r02	3	AF16.19	AF16	23	2/03/15	2	27.15668163	152	434.389937	0.49557267	0.63970162	0.060403511	1
wormd20150203s3AHdAF16rt23w04r03	3	AF16.19	AF16	23	2/03/15	3	28.21790612	100	402.466019	0.4132495	0.55115422	0.060403511	1
wormd20150203s3AHdAF16rt23w04r05	3	AF16.19	AF16	23	2/03/15	5	30.3403551	100	163.5	0.13327652	0.16182542	0.060403511	1
wormd20150203s3AHdAF16rt23w04r06	3	AF16.19	AF16	23	2/03/15	6	31.40157959	172	243.156757	0.25238439	0.31931383	0.060403511	1
wormd20150203s3AHdAF16rt23w04r09	3	AF16.19	AF16	23	2/03/15	9	34.58525306	293	455.53	0.07139849	0.15992168	0.060403511	1
wormd20150203s3AHdAF16rt23w04r10	3	AF16.19	AF16	23	2/03/15	10	35.64647755	138	325.6	0.07874374	0.34260195	0.060403511	1
wormd20150203s3AHdAF16rt23w04r11	3	AF16.19	AF16	23	2/03/15	11	36.70770204	293	424.89	0.07772414	0.2284505	0.060403511	1
wormd20150203s3AHdAF16rt23w04r12	3	AF16.19	AF16	23	2/03/15	12	37.76892653	293	394.55	0.06989635	0.1028709	0.060403511	0
wormd20150203s3AHdAF16rt23w04r13	3	AF16.19	AF16	23	2/03/15	13	38.83015102	293	437.15	0.05977247	0.06040351	0.060403511	0
wormd20150203s3AHdAF16rt23w04r14	3	AF16.19	AF16	23	2/03/15	14	39.89137551	293	425.23	0.06190519	0.06163784	0.060403511	0
wormd20150203s3AHdAF16rt23w04r15	3	AF16.19	AF16	23	2/03/15	15	40.9526	293	439.646667	0.07031485	0.06845564	0.060403511	0
wormd20150203s3AHdAF16rt23w05r00	4	AF16.20	AF16	23	2/03/15	0	25.03423265	235	391.971074	0.42033083	0.4544844	0.053043298	1
wormd20150203s3AHdAF16rt23w05r03	4	AF16.20	AF16	23	2/03/15	3	28.21790612	120	435.409449	0.37575498	0.53768645	0.053043298	1
wormd20150203s3AHdAF16rt23w05r05	4	AF16.20	AF16	23	2/03/15	5	30.3403551	136	238.158273	0.0784949	0.1080904	0.053043298	0
wormd20150203s3AHdAF16rt23w05r07	4	AF16.20	AF16	23	2/03/15	7	32.46280408	158	201.934524	0.03577426	0.0530433	0.053043298	0
wormd20150203s3AHdAF16rt23w05r08	4	AF16.20	AF16	23	2/03/15	8	33.52402857	113	306.533333	0.15661154	0.33330297	0.053043298	1
wormd20150203s3AHdAF16rt23w05r09	4	AF16.20	AF16	23	2/03/15	9	34.58525306	293	490.996667	0.07647148	0.1220256	0.053043298	0
wormd20150203s3AHdAF16rt23w05r10	4	AF16.20	AF16	23	2/03/15	10	35.64647755	227	232.484979	0.03583111	0.06732524	0.053043298	0
wormd20150203s3AHdAF16rt23w05r12	4	AF16.20	AF16	23	2/03/15	12	37.76892653	293	487.573333	0.06758608	0.06806321	0.053043298	0
wormd20150203s3AHdAF16rt23w05r13	4	AF16.20	AF16	23	2/03/15	13	38.83015102	293	486.46	0.07150674	0.07162127	0.053043298	0
wormd20150203s3AHdAF16rt23w05r14	4	AF16.20	AF16	23	2/03/15	14	39.89137551	293	487.066667	0.07077635	0.07143981	0.053043298	0
wormd20150203s3AHdAF16rt23w05r15	4	AF16.20	AF16	23	2/03/15	15	40.9526	293	475.46	0.06926606	0.06970781	0.053043298	0
wormd20150203s3AHdAF16rt23w06r00	5	AF16.21	AF16	23	2/03/15	0	25.03423265	137	534.460606	0.41558263	0.52455383	0.057086198	1
wormd20150203s3AHdAF16rt23w06r01	5	AF16.21	AF16	23	2/03/15	1	26.09545714	253	655.217993	0.38183092	0.49206352	0.057086198	1
wormd20150203s3AHdAF16rt23w06r02	5	AF16.21	AF16	23	2/03/15	2	27.15668163	126	421.569343	0.17580628	0.39201854	0.057086198	1
wormd20150203s3AHdAF16rt23w06r04	5	AF16.21	AF16	23	2/03/15	4	29.27913061	137	630.363014	0.35463522	0.46060438	0.057086198	1
wormd20150203s3AHdAF16rt23w06r05	5	AF16.21	AF16	23	2/03/15	5	30.3403551	162	670.488722	0.36202302	0.54161999	0.057086198	1
wormd20150203s3AHdAF16rt23w06r06	5	AF16.21	AF16	23	2/03/15	6	31.40157959	166	618.58	0.39760145	0.55629747	0.057086198	1
wormd20150203s3AHdAF16rt23w06r08	5	AF16.21	AF16	23	2/03/15	8	33.52402857	104	704.895455	0.2428437	0.52358297	0.057086198	1
wormd20150203s3AHdAF16rt23w06r09	5	AF16.21	AF16	23	2/03/15	9	34.58525306	293	708.586667	0.07284808	0.086593	0.057086198	0
wormd20150203s3AHdAF16rt23w06r10	5	AF16.21	AF16	23	2/03/15	10	35.64647755	269	542.221014	0.1052695	0.35677221	0.057086198	1
wormd20150203s3AHdAF16rt23w06r11	5	AF16.21	AF16	23	2/03/15	11	36.70770204	137	498.654676	0.07303018	0.12503855	0.057086198	0
wormd20150203s3AHdAF16rt23w06r12	5	AF16.21	AF16	23	2/03/15	12	37.76892653	111	568.330435	0.05702784	0.0570862	0.057086198	0
wormd20150203s3AHdAF16rt23w06r13	5	AF16.21	AF16	23	2/03/15	13	38.83015102	128	595.440789	0.06200138	0.06347122	0.057086198	0
wormd20150203s3AHdAF16rt23w06r14	5	AF16.21	AF16	23	2/03/15	14	39.89137551	212	605.039301	0.06440997	0.06381619	0.057086198	0
wormd20150203s3AHdAF16rt23w06r15	5	AF16.21	AF16	23	2/03/15	15	40.9526	241	592.423387	0.07459469	0.07469137	0.057086198	0
wormd20150203s3AHdAF16rt23w10r00	9	AF16.22	AF16	23	2/03/15	0	25.03423265	234	543.571429	0.34020904	0.52181521	0.057465519	1
wormd20150203s3AHdAF16rt23w10r01	9	AF16.22	AF16	23	2/03/15	1	26.09545714	125	652.246032	0.33438987	0.45547359	0.057465519	1
wormd20150203s3AHdAF16rt23w10r02	9	AF16.22	AF16	23	2/03/15	2	27.15668163	105	591.936364	0.41580954	0.52126625	0.057465519	1
wormd20150203s3AHdAF16rt23w10r05	9	AF16.22	AF16	23	2/03/15	5	30.3403551	123	577.285714	0.38023671	0.46114559	0.057465519	1
wormd20150203s3AHdAF16rt23w10r07	9	AF16.22	AF16	23	2/03/15	7	32.46280408	203	108.797101	0.06711018	0.06921818	0.057465519	0
wormd20150203s3AHdAF16rt23w10r08	9	AF16.22	AF16	23	2/03/15	8	33.52402857	128	111.676692	0.0648723	0.07989646	0.057465519	0
wormd20150203s3AHdAF16rt23w10r09	9	AF16.22	AF16	23	2/03/15	9	34.58525306	293	688.446667	0.15668585	0.41622174	0.057465519	1
wormd20150203s3AHdAF16rt23w10r10	9	AF16.22	AF16	23	2/03/15	10	35.64647755	293	596.663333	0.10753056	0.1807975	0.057465519	1
wormd20150203s3AHdAF16rt23w10r11	9	AF16.22	AF16	23	2/03/15	11	36.70770204	293	644.416667	0.09833808	0.18748938	0.057465519	1
wormd20150203s3AHdAF16rt23w10r12	9	AF16.22	AF16	23	2/03/15	12	37.76892653	293	549.603333	0.1003746	0.12084383	0.057465519	0
wormd20150203s3AHdAF16rt23w10r13	9	AF16.22	AF16	23	2/03/15	13	38.83015102	158	458.969697	0.07513225	0.07829531	0.057465519	0
wormd20150203s3AHdAF16rt23w10r15	9	AF16.22	AF16	23	2/03/15	15	40.9526	183	86.8829787	0.05711188	0.05746552	0.057465519	0
wormd20150203s3AHdAF16rt23w11r00	10	AF16.23	AF16	23	2/03/15	0	25.03423265	290	540.319865	0.52093381	0.56838474	0.099136896	1
wormd20150203s3AHdAF16rt23w11r01	10	AF16.23	AF16	23	2/03/15	1	26.09545714	128	534.449612	0.4524183	0.52399565	0.099136896	1
wormd20150203s3AHdAF16rt23w11r02	10	AF16.23	AF16	23	2/03/15	2	27.15668163	139	527.342466	0.48343828	0.58180591	0.099136896	1
wormd20150203s3AHdAF16rt23w11r03	10	AF16.23	AF16	23	2/03/15	3	28.21790612	244	499.314741	0.51452948	0.62710626	0.099136896	1
wormd20150203s3AHdAF16rt23w11r04	10	AF16.23	AF16	23	2/03/15	4	29.27913061	175	515.731959	0.4751166	0.64583515	0.099136896	1
wormd20150203s3AHdAF16rt23w11r08	10	AF16.23	AF16	23	2/03/15	8	33.52402857	293	527.943333	0.10032052	0.13842004	0.099136896	0
wormd20150203s3AHdAF16rt23w11r09	10	AF16.23	AF16	23	2/03/15	9	34.58525306	293	475.12	0.10970539	0.16616023	0.099136896	1
wormd20150203s3AHdAF16rt23w11r10	10	AF16.23	AF16	23	2/03/15	10	35.64647755	293	522.256667	0.10224738	0.16954321	0.099136896	1
wormd20150203s3AHdAF16rt23w11r11	10	AF16.23	AF16	23	2/03/15	11	36.70770204	106	448.45098	0.09828668	0.13760746	0.099136896	0
wormd20150203s3AHdAF16rt23w11r12	10	AF16.23	AF16	23	2/03/15	12	37.76892653	293	451.38	0.10159672	0.10976666	0.099136896	0
wormd20150203s3AHdAF16rt23w11r13	10	AF16.23	AF16	23	2/03/15	13	38.83015102	293	440.42	0.09870337	0.0991369	0.099136896	0
wormd20150203s3AHdAF16rt23w11r14	10	AF16.23	AF16	23	2/03/15	14	39.89137551	293	429.233333	0.10197052	0.10012622	0.099136896	0
wormd20150203s3AHdAF16rt23w11r15	10	AF16.23	AF16	23	2/03/15	15	40.9526	293	469.513333	0.12463347	0.12313691	0.099136896	0
wormd20150203s3AHdAF16rt23w12r00	11	AF16.24	AF16	23	2/03/15	0	25.03423265	275	512.485816	0.52742626	0.56773456	0.066447845	1
wormd20150203s3AHdAF16rt23w12r01	11	AF16.24	AF16	23	2/03/15	1	26.09545714	247	546.350598	0.4491482	0.51756961	0.066447845	1
wormd20150203s3AHdAF16rt23w12r02	11	AF16.24	AF16	23	2/03/15	2	27.15668163	265	570.761029	0.55134218	0.63656549	0.066447845	1
wormd20150203s3AHdAF16rt23w12r03	11	AF16.24	AF16	23	2/03/15	3	28.21790612	125	424.107692	0.17323004	0.21499749	0.066447845	1
wormd20150203s3AHdAF16rt23w12r04	11	AF16.24	AF16	23	2/03/15	4	29.27913061	288	526.776271	0.42627091	0.66300594	0.066447845	1
wormd20150203s3AHdAF16rt23w12r06	11	AF16.24	AF16	23	2/03/15	6	31.40157959	106	486.513043	0.42414499	0.47796447	0.066447845	1
wormd20150203s3AHdAF16rt23w12r07	11	AF16.24	AF16	23	2/03/15	7	32.46280408	105	555.530435	0.31569322	0.57553217	0.066447845	1
wormd20150203s3AHdAF16rt23w12r08	11	AF16.24	AF16	23	2/03/15	8	33.52402857	121	466.014925	0.17379015	0.51223656	0.066447845	1
wormd20150203s3AHdAF16rt23w12r09	11	AF16.24	AF16	23	2/03/15	9	34.58525306	153	495.073446	0.12953158	0.38075359	0.066447845	1
wormd20150203s3AHdAF16rt23w12r10	11	AF16.24	AF16	23	2/03/15	10	35.64647755	293	481.74	0.08380259	0.1788502	0.066447845	1
wormd20150203s3AHdAF16rt23w12r11	11	AF16.24	AF16	23	2/03/15	11	36.70770204	293	479.723333	0.06850716	0.1026125	0.066447845	0
wormd20150203s3AHdAF16rt23w12r12	11	AF16.24	AF16	23	2/03/15	12	37.76892653	293	520.013333	0.06700429	0.07567964	0.066447845	0
wormd20150203s3AHdAF16rt23w12r13	11	AF16.24	AF16	23	2/03/15	13	38.83015102	293	511.923333	0.06500922	0.06693487	0.066447845	0
wormd20150203s3AHdAF16rt23w12r14	11	AF16.24	AF16	23	2/03/15	14	39.89137551	293	492.993333	0.06545803	0.06644785	0.066447845	0
wormd20150203s3AHdAF16rt23w12r15	11	AF16.24	AF16	23	2/03/15	15	40.9526	293	485.13	0.06857704	0.06834773	0.066447845	0
wormd20150203s3AHdAF16rt23w16r00	15	AF16.25	AF16	23	2/03/15	0	25.03423265	239	680.582707	0.46116043	0.50697025	0.035435686	1
wormd20150203s3AHdAF16rt23w16r01	15	AF16.25	AF16	23	2/03/15	1	26.09545714	172	703.662393	0.52453426	0.62777398	0.035435686	1
wormd20150203s3AHdAF16rt23w16r02	15	AF16.25	AF16	23	2/03/15	2	27.15668163	127	163.864706	0.08638508	0.11848689	0.035435686	0
wormd20150203s3AHdAF16rt23w16r03	15	AF16.25	AF16	23	2/03/15	3	28.21790612	184	356.653061	0.20088441	0.24763219	0.035435686	1
wormd20150203s3AHdAF16rt23w16r04	15	AF16.25	AF16	23	2/03/15	4	29.27913061	113	51.5466667	0.01978033	0.03543569	0.035435686	0
wormd20150203s3AHdAF16rt23w16r09	15	AF16.25	AF16	23	2/03/15	9	34.58525306	136	641.49375	0.15606517	0.4821108	0.035435686	1
wormd20150203s3AHdAF16rt23w16r10	15	AF16.25	AF16	23	2/03/15	10	35.64647755	209	521.306723	0.061925	0.06327592	0.035435686	0
wormd20150203s3AHdAF16rt23w16r11	15	AF16.25	AF16	23	2/03/15	11	36.70770204	213	596.368889	0.08820131	0.14493088	0.035435686	1
wormd20150203s3AHdAF16rt23w16r12	15	AF16.25	AF16	23	2/03/15	12	37.76892653	249	633.59176	0.08197046	0.10950229	0.035435686	0
wormd20150203s3AHdAF16rt23w16r13	15	AF16.25	AF16	23	2/03/15	13	38.83015102	293	652.95	0.07573944	0.07892595	0.035435686	0
wormd20150203s3AHdAF16rt23w16r14	15	AF16.25	AF16	23	2/03/15	14	39.89137551	293	651.273333	0.07816175	0.07851204	0.035435686	0
wormd20150203s3AHdAF16rt23w16r15	15	AF16.25	AF16	23	2/03/15	15	40.9526	293	660.876667	0.073612	0.07427036	0.035435686	0
wormd20150203s3AHdAF16rt23w17r00	16	AF16.26	AF16	23	2/03/15	0	25.03423265	166	313.223529	0.63429956	0.72726737	0.084943124	1
wormd20150203s3AHdAF16rt23w17r01	16	AF16.26	AF16	23	2/03/15	1	26.09545714	175	325.620112	0.61190719	0.71518795	0.084943124	1
wormd20150203s3AHdAF16rt23w17r02	16	AF16.26	AF16	23	2/03/15	2	27.15668163	189	316.305699	0.63238657	0.76088181	0.084943124	1
wormd20150203s3AHdAF16rt23w17r03	16	AF16.26	AF16	23	2/03/15	3	28.21790612	213	293.689815	0.52027279	0.61315749	0.084943124	1
wormd20150203s3AHdAF16rt23w17r04	16	AF16.26	AF16	23	2/03/15	4	29.27913061	247	343.555118	0.53747621	0.6690199	0.084943124	1
wormd20150203s3AHdAF16rt23w17r05	16	AF16.26	AF16	23	2/03/15	5	30.3403551	216	102.439462	0.0719313	0.08494312	0.084943124	0
wormd20150203s3AHdAF16rt23w17r06	16	AF16.26	AF16	23	2/03/15	6	31.40157959	223	302.415966	0.53164631	0.55999176	0.084943124	1
wormd20150203s3AHdAF16rt23w17r07	16	AF16.26	AF16	23	2/03/15	7	32.46280408	264	392.273063	0.21809876	0.31677021	0.084943124	1
wormd20150203s3AHdAF16rt23w17r08	16	AF16.26	AF16	23	2/03/15	8	33.52402857	293	497.983333	0.08798259	0.08832631	0.084943124	0
wormd20150203s3AHdAF16rt23w17r09	16	AF16.26	AF16	23	2/03/15	9	34.58525306	293	472.02	0.09218329	0.09338059	0.084943124	0
wormd20150203s3AHdAF16rt23w17r10	16	AF16.26	AF16	23	2/03/15	10	35.64647755	293	473.583333	0.08572678	0.08593388	0.084943124	0
wormd20150203s3AHdAF16rt23w17r11	16	AF16.26	AF16	23	2/03/15	11	36.70770204	293	440.05	0.09281993	0.09381349	0.084943124	0
wormd20150203s3AHdAF16rt23w17r12	16	AF16.26	AF16	23	2/03/15	12	37.76892653	293	395.236667	0.10106141	0.10345951	0.084943124	0
wormd20150203s3AHdAF16rt23w17r13	16	AF16.26	AF16	23	2/03/15	13	38.83015102	293	367.916667	0.11229486	0.11084157	0.084943124	0
wormd20150203s3AHdAF16rt23w17r14	16	AF16.26	AF16	23	2/03/15	14	39.89137551	293	392.073333	0.09900207	0.09912874	0.084943124	0
wormd20150203s3AHdAF16rt23w17r15	16	AF16.26	AF16	23	2/03/15	15	40.9526	293	420.55	0.09112104	0.0911661	0.084943124	0
wormd20150203s3AHdAF16rt23w18r00	17	AF16.27	AF16	23	2/03/15	0	25.03423265	205	544.72093	0.39741144	0.54166799	0.08080742	1
wormd20150203s3AHdAF16rt23w18r01	17	AF16.27	AF16	23	2/03/15	1	26.09545714	189	522.735751	0.43868104	0.50537043	0.08080742	1
wormd20150203s3AHdAF16rt23w18r03	17	AF16.27	AF16	23	2/03/15	3	28.21790612	211	515.041284	0.34230508	0.43328764	0.08080742	1
wormd20150203s3AHdAF16rt23w18r04	17	AF16.27	AF16	23	2/03/15	4	29.27913061	112	449.81746	0.43246612	0.51156217	0.08080742	1
wormd20150203s3AHdAF16rt23w18r05	17	AF16.27	AF16	23	2/03/15	5	30.3403551	120	525.740741	0.26970446	0.61693328	0.08080742	1
wormd20150203s3AHdAF16rt23w18r06	17	AF16.27	AF16	23	2/03/15	6	31.40157959	135	288.035211	0.17366223	0.30553892	0.08080742	1
wormd20150203s3AHdAF16rt23w18r07	17	AF16.27	AF16	23	2/03/15	7	32.46280408	266	485.919414	0.3643977	0.67667385	0.08080742	1
wormd20150203s3AHdAF16rt23w18r11	17	AF16.27	AF16	23	2/03/15	11	36.70770204	293	550.953333	0.08130087	0.08838159	0.08080742	0
wormd20150203s3AHdAF16rt23w18r12	17	AF16.27	AF16	23	2/03/15	12	37.76892653	293	500.37	0.08030621	0.0815224	0.08080742	0
wormd20150203s3AHdAF16rt23w18r13	17	AF16.27	AF16	23	2/03/15	13	38.83015102	293	488.74	0.07965945	0.08080742	0.08080742	0
wormd20150203s3AHdAF16rt23w18r14	17	AF16.27	AF16	23	2/03/15	14	39.89137551	293	490.726667	0.08694017	0.08918353	0.08080742	0
wormd20150203s3AHdAF16rt23w18r15	17	AF16.27	AF16	23	2/03/15	15	40.9526	293	539.313333	0.09308159	0.09250652	0.08080742	0
wormd20150203s5HAdAF16rt23w04r00	3	AF16.28	AF16	23	2/03/15	0	25.03423265	293	600.596667	0.49200924	0.59183662	0.066117256	1
wormd20150203s5HAdAF16rt23w04r01	3	AF16.28	AF16	23	2/03/15	1	26.09545714	293	552.683333	0.49658322	0.62459592	0.066117256	1
wormd20150203s5HAdAF16rt23w04r02	3	AF16.28	AF16	23	2/03/15	2	27.15668163	230	585.008511	0.47098388	0.62222721	0.066117256	1
wormd20150203s5HAdAF16rt23w04r03	3	AF16.28	AF16	23	2/03/15	3	28.21790612	245	582.488095	0.5458129	0.65646967	0.066117256	1
wormd20150203s5HAdAF16rt23w04r04	3	AF16.28	AF16	23	2/03/15	4	29.27913061	269	559.938406	0.54641315	0.68000193	0.066117256	1
wormd20150203s5HAdAF16rt23w04r05	3	AF16.28	AF16	23	2/03/15	5	30.3403551	287	583.363946	0.52614304	0.67945465	0.066117256	1
wormd20150203s5HAdAF16rt23w04r06	3	AF16.28	AF16	23	2/03/15	6	31.40157959	254	610.08209	0.48431966	0.64898236	0.066117256	1
wormd20150203s5HAdAF16rt23w04r07	3	AF16.28	AF16	23	2/03/15	7	32.46280408	194	560.88785	0.53085828	0.64786174	0.066117256	1
wormd20150203s5HAdAF16rt23w04r08	3	AF16.28	AF16	23	2/03/15	8	33.52402857	290	588.639731	0.49083695	0.60461278	0.066117256	1
wormd20150203s5HAdAF16rt23w04r12	3	AF16.28	AF16	23	2/03/15	12	37.76892653	293	554.466667	0.07082682	0.09510497	0.066117256	0
wormd20150203s5HAdAF16rt23w04r13	3	AF16.28	AF16	23	2/03/15	13	38.83015102	293	548.236667	0.0702206	0.07098522	0.066117256	0
wormd20150203s5HAdAF16rt23w04r14	3	AF16.28	AF16	23	2/03/15	14	39.89137551	293	537.4	0.06780823	0.07057522	0.066117256	0
wormd20150203s5HAdAF16rt23w04r15	3	AF16.28	AF16	23	2/03/15	15	40.9526	293	535.143333	0.06551734	0.06611726	0.066117256	0
wormd20150203s5HAdAF16rt23w05r00	4	AF16.29	AF16	23	2/03/15	0	25.03423265	271	627.34657	0.51187715	0.60943441	0.06721944	1
wormd20150203s5HAdAF16rt23w05r01	4	AF16.29	AF16	23	2/03/15	1	26.09545714	293	591.49	0.55686288	0.64269456	0.06721944	1
wormd20150203s5HAdAF16rt23w05r02	4	AF16.29	AF16	23	2/03/15	2	27.15668163	255	621.248092	0.52793791	0.60529841	0.06721944	1
wormd20150203s5HAdAF16rt23w05r03	4	AF16.29	AF16	23	2/03/15	3	28.21790612	234	613.506224	0.5037777	0.65683763	0.06721944	1
wormd20150203s5HAdAF16rt23w05r04	4	AF16.29	AF16	23	2/03/15	4	29.27913061	212	590.757991	0.4408742	0.61548511	0.06721944	1
wormd20150203s5HAdAF16rt23w05r05	4	AF16.29	AF16	23	2/03/15	5	30.3403551	192	603.673367	0.50688523	0.67078099	0.06721944	1
wormd20150203s5HAdAF16rt23w05r06	4	AF16.29	AF16	23	2/03/15	6	31.40157959	227	571.846154	0.51326713	0.64783497	0.06721944	1
wormd20150203s5HAdAF16rt23w05r07	4	AF16.29	AF16	23	2/03/15	7	32.46280408	174	629.195531	0.38186493	0.65186308	0.06721944	1
wormd20150203s5HAdAF16rt23w05r08	4	AF16.29	AF16	23	2/03/15	8	33.52402857	270	628.415162	0.24484873	0.61241537	0.06721944	1
wormd20150203s5HAdAF16rt23w05r09	4	AF16.29	AF16	23	2/03/15	9	34.58525306	130	92.72103	0.08390971	0.08796259	0.06721944	0
wormd20150203s5HAdAF16rt23w05r10	4	AF16.29	AF16	23	2/03/15	10	35.64647755	193	90.9585062	0.07783713	0.08934204	0.06721944	0
wormd20150203s5HAdAF16rt23w05r12	4	AF16.29	AF16	23	2/03/15	12	37.76892653	182	554.020942	0.08410915	0.09521148	0.06721944	0
wormd20150203s5HAdAF16rt23w05r13	4	AF16.29	AF16	23	2/03/15	13	38.83015102	293	571.743333	0.06849138	0.06813939	0.06721944	0
wormd20150203s5HAdAF16rt23w05r14	4	AF16.29	AF16	23	2/03/15	14	39.89137551	293	560.286667	0.07069548	0.06907569	0.06721944	0
wormd20150203s5HAdAF16rt23w05r15	4	AF16.29	AF16	23	2/03/15	15	40.9526	293	561.206667	0.06739504	0.06721944	0.06721944	0
wormd20150203s5HAdAF16rt23w06r00	5	AF16.30	AF16	23	2/03/15	0	25.03423265	246	600.841897	0.43843359	0.55153186	0.073753713	1
wormd20150203s5HAdAF16rt23w06r01	5	AF16.30	AF16	23	2/03/15	1	26.09545714	198	570.712195	0.40620684	0.55015461	0.073753713	1
wormd20150203s5HAdAF16rt23w06r02	5	AF16.30	AF16	23	2/03/15	2	27.15668163	167	677.862832	0.44716856	0.57097206	0.073753713	1
wormd20150203s5HAdAF16rt23w06r03	5	AF16.30	AF16	23	2/03/15	3	28.21790612	150	642.185393	0.39898371	0.60050337	0.073753713	1
wormd20150203s5HAdAF16rt23w06r04	5	AF16.30	AF16	23	2/03/15	4	29.27913061	182	606.119792	0.35735831	0.61381216	0.073753713	1
wormd20150203s5HAdAF16rt23w06r06	5	AF16.30	AF16	23	2/03/15	6	31.40157959	124	567.049296	0.31387473	0.55032834	0.073753713	1
wormd20150203s5HAdAF16rt23w06r07	5	AF16.30	AF16	23	2/03/15	7	32.46280408	100	547.897196	0.29444698	0.37542798	0.073753713	1
wormd20150203s5HAdAF16rt23w06r10	5	AF16.30	AF16	23	2/03/15	10	35.64647755	293	688.543333	0.13401808	0.45776484	0.073753713	1
wormd20150203s5HAdAF16rt23w06r11	5	AF16.30	AF16	23	2/03/15	11	36.70770204	293	546.983333	0.08598061	0.16091321	0.073753713	1
wormd20150203s5HAdAF16rt23w06r12	5	AF16.30	AF16	23	2/03/15	12	37.76892653	293	535.633333	0.07467014	0.08244184	0.073753713	0
wormd20150203s5HAdAF16rt23w06r13	5	AF16.30	AF16	23	2/03/15	13	38.83015102	293	540.47	0.07490149	0.07483443	0.073753713	0
wormd20150203s5HAdAF16rt23w06r14	5	AF16.30	AF16	23	2/03/15	14	39.89137551	293	560.866667	0.07385104	0.07375371	0.073753713	0
wormd20150203s5HAdAF16rt23w06r15	5	AF16.30	AF16	23	2/03/15	15	40.9526	276	586.427562	0.0789383	0.07891275	0.073753713	0
wormd20150203s5HAdAF16rt23w10r00	9	AF16.31	AF16	23	2/03/15	0	25.03423265	274	578.035587	0.48778058	0.56750387	0.081866524	1
wormd20150203s5HAdAF16rt23w10r01	9	AF16.31	AF16	23	2/03/15	1	26.09545714	287	636.60274	0.34830674	0.55298776	0.081866524	1
wormd20150203s5HAdAF16rt23w10r02	9	AF16.31	AF16	23	2/03/15	2	27.15668163	283	635.210345	0.38461421	0.55881348	0.081866524	1
wormd20150203s5HAdAF16rt23w10r03	9	AF16.31	AF16	23	2/03/15	3	28.21790612	216	598.847737	0.39018961	0.58571086	0.081866524	1
wormd20150203s5HAdAF16rt23w10r04	9	AF16.31	AF16	23	2/03/15	4	29.27913061	261	653.883895	0.43007795	0.49932226	0.081866524	1
wormd20150203s5HAdAF16rt23w10r05	9	AF16.31	AF16	23	2/03/15	5	30.3403551	263	579.5	0.37758722	0.52691873	0.081866524	1
wormd20150203s5HAdAF16rt23w10r06	9	AF16.31	AF16	23	2/03/15	6	31.40157959	282	624.305556	0.33379124	0.42824669	0.081866524	1
wormd20150203s5HAdAF16rt23w10r07	9	AF16.31	AF16	23	2/03/15	7	32.46280408	132	638.792035	0.28587447	0.43942988	0.081866524	1
wormd20150203s5HAdAF16rt23w10r11	9	AF16.31	AF16	23	2/03/15	11	36.70770204	293	521.61	0.09463014	0.12854434	0.081866524	0
wormd20150203s5HAdAF16rt23w10r12	9	AF16.31	AF16	23	2/03/15	12	37.76892653	293	569.296667	0.09057028	0.11354997	0.081866524	0
wormd20150203s5HAdAF16rt23w10r13	9	AF16.31	AF16	23	2/03/15	13	38.83015102	293	606.066667	0.08120159	0.08186652	0.081866524	0
wormd20150203s5HAdAF16rt23w10r14	9	AF16.31	AF16	23	2/03/15	14	39.89137551	293	594.673333	0.08816945	0.08813417	0.081866524	0
wormd20150203s5HAdAF16rt23w10r15	9	AF16.31	AF16	23	2/03/15	15	40.9526	293	541.943333	0.09245411	0.09164317	0.081866524	0
wormd20150203s5HAdAF16rt23w11r00	10	AF16.32	AF16	23	2/03/15	0	25.03423265	293	623.673333	0.35565272	0.542579	0.081665287	1
wormd20150203s5HAdAF16rt23w11r01	10	AF16.32	AF16	23	2/03/15	1	26.09545714	223	598.736402	0.39448483	0.46287086	0.081665287	1
wormd20150203s5HAdAF16rt23w11r02	10	AF16.32	AF16	23	2/03/15	2	27.15668163	263	605.592593	0.39951159	0.48027119	0.081665287	1
wormd20150203s5HAdAF16rt23w11r03	10	AF16.32	AF16	23	2/03/15	3	28.21790612	288	607.610169	0.38720598	0.47779419	0.081665287	1
wormd20150203s5HAdAF16rt23w11r04	10	AF16.32	AF16	23	2/03/15	4	29.27913061	268	621.570909	0.38660738	0.48494474	0.081665287	1
wormd20150203s5HAdAF16rt23w11r05	10	AF16.32	AF16	23	2/03/15	5	30.3403551	210	582.478632	0.37408853	0.50428579	0.081665287	1
wormd20150203s5HAdAF16rt23w11r06	10	AF16.32	AF16	23	2/03/15	6	31.40157959	223	598.594262	0.36250272	0.45845231	0.081665287	1
wormd20150203s5HAdAF16rt23w11r07	10	AF16.32	AF16	23	2/03/15	7	32.46280408	230	569.467742	0.23210006	0.53631699	0.081665287	1
wormd20150203s5HAdAF16rt23w11r08	10	AF16.32	AF16	23	2/03/15	8	33.52402857	293	642.173333	0.09437316	0.23118365	0.081665287	1
wormd20150203s5HAdAF16rt23w11r09	10	AF16.32	AF16	23	2/03/15	9	34.58525306	293	611.953333	0.09270594	0.18067945	0.081665287	1
wormd20150203s5HAdAF16rt23w11r10	10	AF16.32	AF16	23	2/03/15	10	35.64647755	293	605.046667	0.09228445	0.18203305	0.081665287	1
wormd20150203s5HAdAF16rt23w11r11	10	AF16.32	AF16	23	2/03/15	11	36.70770204	293	579.78	0.08147665	0.08166529	0.081665287	0
wormd20150203s5HAdAF16rt23w11r12	10	AF16.32	AF16	23	2/03/15	12	37.76892653	293	576.99	0.08315406	0.08230926	0.081665287	0
wormd20150203s5HAdAF16rt23w11r13	10	AF16.32	AF16	23	2/03/15	13	38.83015102	293	573.936667	0.08180256	0.08196084	0.081665287	0
wormd20150203s5HAdAF16rt23w11r14	10	AF16.32	AF16	23	2/03/15	14	39.89137551	293	568.476667	0.083311	0.08365852	0.081665287	0
wormd20150203s5HAdAF16rt23w11r15	10	AF16.32	AF16	23	2/03/15	15	40.9526	293	561.93	0.08176805	0.08219876	0.081665287	0
wormd20150203s5HAdAF16rt23w12r00	11	AF16.33	AF16	23	2/03/15	0	25.03423265	293	593.74	0.50296235	0.57541082	0.062537414	1
wormd20150203s5HAdAF16rt23w12r01	11	AF16.33	AF16	23	2/03/15	1	26.09545714	274	633.336806	0.44966711	0.54502676	0.062537414	1
wormd20150203s5HAdAF16rt23w12r02	11	AF16.33	AF16	23	2/03/15	2	27.15668163	191	684.622137	0.40555012	0.49778683	0.062537414	1
wormd20150203s5HAdAF16rt23w12r03	11	AF16.33	AF16	23	2/03/15	3	28.21790612	293	616.2	0.41626979	0.51751699	0.062537414	1
wormd20150203s5HAdAF16rt23w12r04	11	AF16.33	AF16	23	2/03/15	4	29.27913061	271	642.427586	0.42774537	0.50341658	0.062537414	1
wormd20150203s5HAdAF16rt23w12r05	11	AF16.33	AF16	23	2/03/15	5	30.3403551	218	680.415686	0.37787303	0.47449765	0.062537414	1
wormd20150203s5HAdAF16rt23w12r06	11	AF16.33	AF16	23	2/03/15	6	31.40157959	208	676.43985	0.34644286	0.46522406	0.062537414	1
wormd20150203s5HAdAF16rt23w12r07	11	AF16.33	AF16	23	2/03/15	7	32.46280408	155	527.365269	0.29794235	0.48524446	0.062537414	1
wormd20150203s5HAdAF16rt23w12r09	11	AF16.33	AF16	23	2/03/15	9	34.58525306	230	627.190283	0.16577758	0.47138795	0.062537414	1
wormd20150203s5HAdAF16rt23w12r11	11	AF16.33	AF16	23	2/03/15	11	36.70770204	293	608.136667	0.08219491	0.14077864	0.062537414	1
wormd20150203s5HAdAF16rt23w12r12	11	AF16.33	AF16	23	2/03/15	12	37.76892653	293	653.153333	0.07035033	0.07075601	0.062537414	0
wormd20150203s5HAdAF16rt23w12r13	11	AF16.33	AF16	23	2/03/15	13	38.83015102	293	694.196667	0.06901727	0.06949031	0.062537414	0
wormd20150203s5HAdAF16rt23w12r14	11	AF16.33	AF16	23	2/03/15	14	39.89137551	293	706.886667	0.06203319	0.06253741	0.062537414	0
wormd20150203s5HAdAF16rt23w12r15	11	AF16.33	AF16	23	2/03/15	15	40.9526	293	699.58	0.06306686	0.06298499	0.062537414	0
wormd20150203s5HAdAF16rt23w16r00	15	AF16.34	AF16	23	2/03/15	0	25.03423265	289	616.003378	0.47381458	0.57494984	0.085088316	1
wormd20150203s5HAdAF16rt23w16r01	15	AF16.34	AF16	23	2/03/15	1	26.09545714	262	575.942857	0.48127856	0.56917402	0.085088316	1
wormd20150203s5HAdAF16rt23w16r03	15	AF16.34	AF16	23	2/03/15	3	28.21790612	219	127.20354	0.22782025	0.23262665	0.085088316	1
wormd20150203s5HAdAF16rt23w16r04	15	AF16.34	AF16	23	2/03/15	4	29.27913061	129	168.383459	0.23944555	0.23628334	0.085088316	1
wormd20150203s5HAdAF16rt23w16r07	15	AF16.34	AF16	23	2/03/15	7	32.46280408	150	101.908497	0.19480558	0.23160209	0.085088316	1
wormd20150203s5HAdAF16rt23w16r08	15	AF16.34	AF16	23	2/03/15	8	33.52402857	195	115.024752	0.18626995	0.25601667	0.085088316	1
wormd20150203s5HAdAF16rt23w16r09	15	AF16.34	AF16	23	2/03/15	9	34.58525306	218	121.288889	0.18212894	0.22208982	0.085088316	1
wormd20150203s5HAdAF16rt23w16r10	15	AF16.34	AF16	23	2/03/15	10	35.64647755	239	596.814815	0.09970484	0.1125786	0.085088316	0
wormd20150203s5HAdAF16rt23w16r11	15	AF16.34	AF16	23	2/03/15	11	36.70770204	293	685.593333	0.08415973	0.08508832	0.085088316	0
wormd20150203s5HAdAF16rt23w16r12	15	AF16.34	AF16	23	2/03/15	12	37.76892653	189	146.921466	0.17258004	0.27189552	0.085088316	1
wormd20150203s5HAdAF16rt23w16r13	15	AF16.34	AF16	23	2/03/15	13	38.83015102	210	129.37788	0.17223452	0.27384334	0.085088316	1
wormd20150203s5HAdAF16rt23w16r14	15	AF16.34	AF16	23	2/03/15	14	39.89137551	246	124.374502	0.17314736	0.22899958	0.085088316	1
wormd20150203s5HAdAF16rt23w16r15	15	AF16.34	AF16	23	2/03/15	15	40.9526	239	112.584362	0.18095489	0.21115225	0.085088316	1
wormd20150203s5HAdAF16rt23w17r00	16	AF16.35	AF16	23	2/03/15	0	25.03423265	285	672.852843	0.42572207	0.54058874	0.065794009	1
wormd20150203s5HAdAF16rt23w17r01	16	AF16.35	AF16	23	2/03/15	1	26.09545714	293	582.473333	0.49757668	0.57568436	0.065794009	1
wormd20150203s5HAdAF16rt23w17r02	16	AF16.35	AF16	23	2/03/15	2	27.15668163	287	555.047619	0.52598129	0.61528492	0.065794009	1
wormd20150203s5HAdAF16rt23w17r03	16	AF16.35	AF16	23	2/03/15	3	28.21790612	174	699.816594	0.45556626	0.58225642	0.065794009	1
wormd20150203s5HAdAF16rt23w17r04	16	AF16.35	AF16	23	2/03/15	4	29.27913061	147	607.094527	0.3900388	0.55179583	0.065794009	1
wormd20150203s5HAdAF16rt23w17r05	16	AF16.35	AF16	23	2/03/15	5	30.3403551	244	590.557769	0.48074877	0.54677558	0.065794009	1
wormd20150203s5HAdAF16rt23w17r06	16	AF16.35	AF16	23	2/03/15	6	31.40157959	173	631.159341	0.38397475	0.48542201	0.065794009	1
wormd20150203s5HAdAF16rt23w17r07	16	AF16.35	AF16	23	2/03/15	7	32.46280408	178	125.633166	0.1096444	0.11794244	0.065794009	0
wormd20150203s5HAdAF16rt23w17r08	16	AF16.35	AF16	23	2/03/15	8	33.52402857	293	581.006667	0.28283653	0.65755858	0.065794009	1
wormd20150203s5HAdAF16rt23w17r11	16	AF16.35	AF16	23	2/03/15	11	36.70770204	160	415.064516	0.09476024	0.1304032	0.065794009	0
wormd20150203s5HAdAF16rt23w17r13	16	AF16.35	AF16	23	2/03/15	13	38.83015102	269	670.510135	0.06683665	0.06704564	0.065794009	0
wormd20150203s5HAdAF16rt23w17r14	16	AF16.35	AF16	23	2/03/15	14	39.89137551	293	682.44	0.06558021	0.06579401	0.065794009	0
wormd20150203s5HAdAF16rt23w17r15	16	AF16.35	AF16	23	2/03/15	15	40.9526	293	664.353333	0.06860956	0.06850724	0.065794009	0
wormd20150203s5HAdAF16rt23w18r00	17	AF16.36	AF16	23	2/03/15	0	25.03423265	293	571.696667	0.41826984	0.48471309	0.072595933	1
wormd20150203s5HAdAF16rt23w18r01	17	AF16.36	AF16	23	2/03/15	1	26.09545714	276	529.501767	0.48231722	0.56038582	0.072595933	1
wormd20150203s5HAdAF16rt23w18r02	17	AF16.36	AF16	23	2/03/15	2	27.15668163	292	590.973244	0.47955003	0.57846198	0.072595933	1
wormd20150203s5HAdAF16rt23w18r03	17	AF16.36	AF16	23	2/03/15	3	28.21790612	285	553.604811	0.51448847	0.59929555	0.072595933	1
wormd20150203s5HAdAF16rt23w18r04	17	AF16.36	AF16	23	2/03/15	4	29.27913061	290	629.737374	0.39475944	0.51399609	0.072595933	1
wormd20150203s5HAdAF16rt23w18r05	17	AF16.36	AF16	23	2/03/15	5	30.3403551	283	563.996552	0.37585664	0.5744062	0.072595933	1
wormd20150203s5HAdAF16rt23w18r06	17	AF16.36	AF16	23	2/03/15	6	31.40157959	284	619.62543	0.35262217	0.52471239	0.072595933	1
wormd20150203s5HAdAF16rt23w18r07	17	AF16.36	AF16	23	2/03/15	7	32.46280408	261	591.550173	0.26567535	0.67052305	0.072595933	1
wormd20150203s5HAdAF16rt23w18r08	17	AF16.36	AF16	23	2/03/15	8	33.52402857	273	515.671429	0.23284248	0.68445995	0.072595933	1
wormd20150203s5HAdAF16rt23w18r09	17	AF16.36	AF16	23	2/03/15	9	34.58525306	276	655.692568	0.18695938	0.5547174	0.072595933	1
wormd20150203s5HAdAF16rt23w18r10	17	AF16.36	AF16	23	2/03/15	10	35.64647755	104	589.917808	0.11634806	0.27449291	0.072595933	1
wormd20150203s5HAdAF16rt23w18r11	17	AF16.36	AF16	23	2/03/15	11	36.70770204	269	519.163043	0.09269868	0.21151131	0.072595933	1
wormd20150203s5HAdAF16rt23w18r12	17	AF16.36	AF16	23	2/03/15	12	37.76892653	293	625.013333	0.07823801	0.08052055	0.072595933	0
wormd20150203s5HAdAF16rt23w18r13	17	AF16.36	AF16	23	2/03/15	13	38.83015102	293	630.37	0.07604064	0.07636033	0.072595933	0
wormd20150203s5HAdAF16rt23w18r14	17	AF16.36	AF16	23	2/03/15	14	39.89137551	293	612.86	0.0771164	0.07711179	0.072595933	0
wormd20150203s5HAdAF16rt23w18r15	17	AF16.36	AF16	23	2/03/15	15	40.9526	293	636.546667	0.07285045	0.07259593	0.072595933	0
wormd20150203s7HK104AF16rt23w04r00	3	AF16.37	AF16	23	2/03/15	0	25.03423265	195	597.21393	0.4169913	0.56226488	0.036201319	1
wormd20150203s7HK104AF16rt23w04r02	3	AF16.37	AF16	23	2/03/15	2	27.15668163	111	562.878049	0.33492009	0.41623832	0.036201319	1
wormd20150203s7HK104AF16rt23w04r04	3	AF16.37	AF16	23	2/03/15	4	29.27913061	243	545.894309	0.36613021	0.62297831	0.036201319	1
wormd20150203s7HK104AF16rt23w04r07	3	AF16.37	AF16	23	2/03/15	7	32.46280408	221	366.925	0.19902464	0.25765677	0.036201319	1
wormd20150203s7HK104AF16rt23w04r08	3	AF16.37	AF16	23	2/03/15	8	33.52402857	249	122.484375	0.03603688	0.03620132	0.036201319	0
wormd20150203s7HK104AF16rt23w04r09	3	AF16.37	AF16	23	2/03/15	9	34.58525306	293	594.35	0.10475215	0.10651726	0.036201319	0
wormd20150203s7HK104AF16rt23w04r10	3	AF16.37	AF16	23	2/03/15	10	35.64647755	195	513.9869	0.12725153	0.32276851	0.036201319	1
wormd20150203s7HK104AF16rt23w04r11	3	AF16.37	AF16	23	2/03/15	11	36.70770204	293	472.97	0.11938038	0.14346219	0.036201319	1
wormd20150203s7HK104AF16rt23w04r12	3	AF16.37	AF16	23	2/03/15	12	37.76892653	293	515.406667	0.11327101	0.12577033	0.036201319	0
wormd20150203s7HK104AF16rt23w04r13	3	AF16.37	AF16	23	2/03/15	13	38.83015102	293	525.67	0.10946816	0.10941279	0.036201319	0
wormd20150203s7HK104AF16rt23w04r14	3	AF16.37	AF16	23	2/03/15	14	39.89137551	293	518.806667	0.10579458	0.10502953	0.036201319	0
wormd20150203s7HK104AF16rt23w04r15	3	AF16.37	AF16	23	2/03/15	15	40.9526	293	530.51	0.10180215	0.10235113	0.036201319	0
wormd20150203s7HK104AF16rt23w05r00	4	AF16.38	AF16	23	2/03/15	0	25.03423265	293	597.183333	0.37507869	0.50642892	0.093933969	1
wormd20150203s7HK104AF16rt23w05r01	4	AF16.38	AF16	23	2/03/15	1	26.09545714	292	512.759197	0.49316511	0.62957968	0.093933969	1
wormd20150203s7HK104AF16rt23w05r02	4	AF16.38	AF16	23	2/03/15	2	27.15668163	290	564.723906	0.50870178	0.58901305	0.093933969	1
wormd20150203s7HK104AF16rt23w05r03	4	AF16.38	AF16	23	2/03/15	3	28.21790612	173	554.880682	0.49341068	0.5908676	0.093933969	1
wormd20150203s7HK104AF16rt23w05r05	4	AF16.38	AF16	23	2/03/15	5	30.3403551	289	541.226351	0.54625148	0.63495247	0.093933969	1
wormd20150203s7HK104AF16rt23w05r07	4	AF16.38	AF16	23	2/03/15	7	32.46280408	221	614.356846	0.31516192	0.574622	0.093933969	1
wormd20150203s7HK104AF16rt23w05r08	4	AF16.38	AF16	23	2/03/15	8	33.52402857	293	532.27	0.27873911	0.6207124	0.093933969	1
wormd20150203s7HK104AF16rt23w05r09	4	AF16.38	AF16	23	2/03/15	9	34.58525306	116	501.672269	0.22319475	0.58126844	0.093933969	1
wormd20150203s7HK104AF16rt23w05r10	4	AF16.38	AF16	23	2/03/15	10	35.64647755	293	597.47	0.11442753	0.36217471	0.093933969	1
wormd20150203s7HK104AF16rt23w05r12	4	AF16.38	AF16	23	2/03/15	12	37.76892653	283	481.666667	0.09697811	0.14662634	0.093933969	1
wormd20150203s7HK104AF16rt23w05r13	4	AF16.38	AF16	23	2/03/15	13	38.83015102	293	508.196667	0.09554921	0.09594335	0.093933969	0
wormd20150203s7HK104AF16rt23w05r14	4	AF16.38	AF16	23	2/03/15	14	39.89137551	293	515.363333	0.09476332	0.09393397	0.093933969	0
wormd20150203s7HK104AF16rt23w06r00	5	AF16.39	AF16	23	2/03/15	0	25.03423265	147	668.938144	0.44292032	0.57525272	0.103920356	1
wormd20150203s7HK104AF16rt23w06r01	5	AF16.39	AF16	23	2/03/15	1	26.09545714	139	598.236842	0.42122394	0.54562485	0.103920356	1
wormd20150203s7HK104AF16rt23w06r02	5	AF16.39	AF16	23	2/03/15	2	27.15668163	114	692.633166	0.35022586	0.5888281	0.103920356	1
wormd20150203s7HK104AF16rt23w06r04	5	AF16.39	AF16	23	2/03/15	4	29.27913061	135	666.316832	0.42726576	0.64060967	0.103920356	1
wormd20150203s7HK104AF16rt23w06r08	5	AF16.39	AF16	23	2/03/15	8	33.52402857	140	576.673203	0.25154769	0.38895783	0.103920356	1
wormd20150203s7HK104AF16rt23w06r11	5	AF16.39	AF16	23	2/03/15	11	36.70770204	263	739.878049	0.09477952	0.23092911	0.103920356	1
wormd20150203s7HK104AF16rt23w06r12	5	AF16.39	AF16	23	2/03/15	12	37.76892653	293	697.476667	0.08516151	0.10392036	0.103920356	0
wormd20150203s7HK104AF16rt23w10r00	9	AF16.40	AF16	23	2/03/15	0	25.03423265	289	530.560811	0.45516168	0.5701809	0.14372623	1
wormd20150203s7HK104AF16rt23w10r01	9	AF16.40	AF16	23	2/03/15	1	26.09545714	172	519.455056	0.4614073	0.59594372	0.14372623	1
wormd20150203s7HK104AF16rt23w10r03	9	AF16.40	AF16	23	2/03/15	3	28.21790612	114	550.44	0.45500064	0.62111213	0.14372623	1
wormd20150203s7HK104AF16rt23w10r05	9	AF16.40	AF16	23	2/03/15	5	30.3403551	183	556.812834	0.39384882	0.54805294	0.14372623	1
wormd20150203s7HK104AF16rt23w10r06	9	AF16.40	AF16	23	2/03/15	6	31.40157959	154	537.512048	0.40025999	0.5732439	0.14372623	1
wormd20150203s7HK104AF16rt23w10r11	9	AF16.40	AF16	23	2/03/15	11	36.70770204	293	511.64	0.10740975	0.2106618	0.14372623	1
wormd20150203s7HK104AF16rt23w10r12	9	AF16.40	AF16	23	2/03/15	12	37.76892653	206	511.496	0.10010518	0.14372623	0.14372623	1
wormd20150203s7HK104AF16rt23w11r00	10	AF16.41	AF16	23	2/03/15	0	25.03423265	202	397.368421	0.28921688	0.34334697	0.108621319	1
wormd20150203s7HK104AF16rt23w11r01	10	AF16.41	AF16	23	2/03/15	1	26.09545714	240	549.315789	0.45223045	0.57100165	0.108621319	1
wormd20150203s7HK104AF16rt23w11r02	10	AF16.41	AF16	23	2/03/15	2	27.15668163	171	386.466292	0.29845748	0.40237084	0.108621319	1
wormd20150203s7HK104AF16rt23w11r05	10	AF16.41	AF16	23	2/03/15	5	30.3403551	133	503.014815	0.46298242	0.5526108	0.108621319	1
wormd20150203s7HK104AF16rt23w11r06	10	AF16.41	AF16	23	2/03/15	6	31.40157959	140	528.377622	0.36502454	0.45678049	0.108621319	1
wormd20150203s7HK104AF16rt23w11r07	10	AF16.41	AF16	23	2/03/15	7	32.46280408	277	533.883392	0.46176062	0.58782814	0.108621319	1
wormd20150203s7HK104AF16rt23w11r08	10	AF16.41	AF16	23	2/03/15	8	33.52402857	169	457.153409	0.30152492	0.57170161	0.108621319	1
wormd20150203s7HK104AF16rt23w11r12	10	AF16.41	AF16	23	2/03/15	12	37.76892653	293	570.746667	0.10876068	0.11111409	0.108621319	0
wormd20150203s7HK104AF16rt23w11r13	10	AF16.41	AF16	23	2/03/15	13	38.83015102	293	583.283333	0.10679692	0.10862132	0.108621319	0
wormd20150203s7HK104AF16rt23w11r14	10	AF16.41	AF16	23	2/03/15	14	39.89137551	293	511.913333	0.11156065	0.11071546	0.108621319	0
wormd20150203s7HK104AF16rt23w11r15	10	AF16.41	AF16	23	2/03/15	15	40.9526	293	526.27	0.11532746	0.11513756	0.108621319	0
wormd20150203s7HK104AF16rt23w12r00	11	AF16.42	AF16	23	2/03/15	0	25.03423265	222	496.445415	0.44943736	0.55649506	0.096351907	1
wormd20150203s7HK104AF16rt23w12r01	11	AF16.42	AF16	23	2/03/15	1	26.09545714	165	624.985981	0.3553556	0.60289799	0.096351907	1
wormd20150203s7HK104AF16rt23w12r02	11	AF16.42	AF16	23	2/03/15	2	27.15668163	217	503.215859	0.50928401	0.6346993	0.096351907	1
wormd20150203s7HK104AF16rt23w12r03	11	AF16.42	AF16	23	2/03/15	3	28.21790612	180	621.380282	0.37123012	0.50166605	0.096351907	1
wormd20150203s7HK104AF16rt23w12r04	11	AF16.42	AF16	23	2/03/15	4	29.27913061	219	624.199115	0.45698088	0.54274877	0.096351907	1
wormd20150203s7HK104AF16rt23w12r05	11	AF16.42	AF16	23	2/03/15	5	30.3403551	193	510.995074	0.26420165	0.46482045	0.096351907	1
wormd20150203s7HK104AF16rt23w12r06	11	AF16.42	AF16	23	2/03/15	6	31.40157959	118	536.1	0.29285489	0.50673996	0.096351907	1
wormd20150203s7HK104AF16rt23w12r08	11	AF16.42	AF16	23	2/03/15	8	33.52402857	293	669.97	0.20986529	0.54245229	0.096351907	1
wormd20150203s7HK104AF16rt23w12r09	11	AF16.42	AF16	23	2/03/15	9	34.58525306	293	592.736667	0.15442558	0.45793418	0.096351907	1
wormd20150203s7HK104AF16rt23w12r11	11	AF16.42	AF16	23	2/03/15	11	36.70770204	259	550.747253	0.10725214	0.34814728	0.096351907	1
wormd20150203s7HK104AF16rt23w12r12	11	AF16.42	AF16	23	2/03/15	12	37.76892653	293	527.14	0.09155576	0.11342322	0.096351907	0
wormd20150203s7HK104AF16rt23w12r13	11	AF16.42	AF16	23	2/03/15	13	38.83015102	293	492.666667	0.10114114	0.10003053	0.096351907	0
wormd20150203s7HK104AF16rt23w12r14	11	AF16.42	AF16	23	2/03/15	14	39.89137551	293	455.636667	0.10059744	0.09991331	0.096351907	0
wormd20150203s7HK104AF16rt23w12r15	11	AF16.42	AF16	23	2/03/15	15	40.9526	293	559.346667	0.09617578	0.09635191	0.096351907	0
wormd20150203s7HK104AF16rt23w16r00	15	AF16.43	AF16	23	2/03/15	0	25.03423265	293	612.926667	0.39427736	0.51152316	0.113675911	1
wormd20150203s7HK104AF16rt23w16r01	15	AF16.43	AF16	23	2/03/15	1	26.09545714	252	626.962406	0.40565107	0.52217273	0.113675911	1
wormd20150203s7HK104AF16rt23w16r02	15	AF16.43	AF16	23	2/03/15	2	27.15668163	251	661.828897	0.36002494	0.52153426	0.113675911	1
wormd20150203s7HK104AF16rt23w16r03	15	AF16.43	AF16	23	2/03/15	3	28.21790612	214	607.692661	0.37524727	0.56363083	0.113675911	1
wormd20150203s7HK104AF16rt23w16r04	15	AF16.43	AF16	23	2/03/15	4	29.27913061	287	619.836735	0.3728433	0.59175394	0.113675911	1
wormd20150203s7HK104AF16rt23w16r05	15	AF16.43	AF16	23	2/03/15	5	30.3403551	221	632.927039	0.380159	0.56049178	0.113675911	1
wormd20150203s7HK104AF16rt23w16r06	15	AF16.43	AF16	23	2/03/15	6	31.40157959	189	669.308458	0.32652036	0.55007253	0.113675911	1
wormd20150203s7HK104AF16rt23w16r07	15	AF16.43	AF16	23	2/03/15	7	32.46280408	107	505.672414	0.22030565	0.47286785	0.113675911	1
wormd20150203s7HK104AF16rt23w16r10	15	AF16.43	AF16	23	2/03/15	10	35.64647755	172	211.164773	0.14042241	0.14431613	0.113675911	1
wormd20150203s7HK104AF16rt23w16r13	15	AF16.43	AF16	23	2/03/15	13	38.83015102	111	271.765217	0.12436532	0.12642614	0.113675911	0
wormd20150203s7HK104AF16rt23w16r14	15	AF16.43	AF16	23	2/03/15	14	39.89137551	161	265.717791	0.1237897	0.12432517	0.113675911	0
wormd20150203s7HK104AF16rt23w16r15	15	AF16.43	AF16	23	2/03/15	15	40.9526	278	275.57193	0.11499613	0.11367591	0.113675911	0
wormd20150203s7HK104AF16rt23w17r00	16	AF16.44	AF16	23	2/03/15	0	25.03423265	293	522.483333	0.43322481	0.58263372	0.119181917	1
wormd20150203s7HK104AF16rt23w17r01	16	AF16.44	AF16	23	2/03/15	1	26.09545714	288	535.820339	0.52103188	0.61121681	0.119181917	1
wormd20150203s7HK104AF16rt23w17r02	16	AF16.44	AF16	23	2/03/15	2	27.15668163	293	508.25	0.51932517	0.63501104	0.119181917	1
wormd20150203s7HK104AF16rt23w17r03	16	AF16.44	AF16	23	2/03/15	3	28.21790612	235	551.390041	0.51672656	0.62202441	0.119181917	1
wormd20150203s7HK104AF16rt23w17r04	16	AF16.44	AF16	23	2/03/15	4	29.27913061	101	119.037736	0.25456257	0.25924996	0.119181917	1
wormd20150203s7HK104AF16rt23w17r05	16	AF16.44	AF16	23	2/03/15	5	30.3403551	245	138.688	0.22665031	0.23814883	0.119181917	1
wormd20150203s7HK104AF16rt23w17r06	16	AF16.44	AF16	23	2/03/15	6	31.40157959	264	172.188192	0.20004045	0.20783473	0.119181917	1
wormd20150203s7HK104AF16rt23w17r07	16	AF16.44	AF16	23	2/03/15	7	32.46280408	283	213.17931	0.19394165	0.19570527	0.119181917	1
wormd20150203s7HK104AF16rt23w17r08	16	AF16.44	AF16	23	2/03/15	8	33.52402857	289	252.476351	0.17129182	0.17486537	0.119181917	1
wormd20150203s7HK104AF16rt23w17r09	16	AF16.44	AF16	23	2/03/15	9	34.58525306	279	290.65035	0.15975318	0.16515925	0.119181917	1
wormd20150203s7HK104AF16rt23w17r10	16	AF16.44	AF16	23	2/03/15	10	35.64647755	187	333.118557	0.14077361	0.14636182	0.119181917	1
wormd20150203s7HK104AF16rt23w17r11	16	AF16.44	AF16	23	2/03/15	11	36.70770204	239	345.841463	0.14338698	0.15007325	0.119181917	1
wormd20150203s7HK104AF16rt23w17r12	16	AF16.44	AF16	23	2/03/15	12	37.76892653	173	369.162921	0.1183281	0.11918192	0.119181917	0
wormd20150203s7HK104AF16rt23w17r13	16	AF16.44	AF16	23	2/03/15	13	38.83015102	135	374.021739	0.11506759	0.12158833	0.119181917	0
wormd20150203s7HK104AF16rt23w18r00	17	AF16.45	AF16	23	2/03/15	0	25.03423265	293	587.043333	0.43109852	0.51749349	0.082383097	1
wormd20150203s7HK104AF16rt23w18r01	17	AF16.45	AF16	23	2/03/15	1	26.09545714	281	612.162712	0.46125269	0.55690851	0.082383097	1
wormd20150203s7HK104AF16rt23w18r02	17	AF16.45	AF16	23	2/03/15	2	27.15668163	214	586.599119	0.488295	0.57596485	0.082383097	1
wormd20150203s7HK104AF16rt23w18r03	17	AF16.45	AF16	23	2/03/15	3	28.21790612	285	594.204861	0.48247994	0.58689114	0.082383097	1
wormd20150203s7HK104AF16rt23w18r04	17	AF16.45	AF16	23	2/03/15	4	29.27913061	157	583.005814	0.45190474	0.51405387	0.082383097	1
wormd20150203s7HK104AF16rt23w18r05	17	AF16.45	AF16	23	2/03/15	5	30.3403551	287	571.597938	0.45183965	0.57010252	0.082383097	1
wormd20150203s7HK104AF16rt23w18r06	17	AF16.45	AF16	23	2/03/15	6	31.40157959	182	627.261682	0.46396504	0.52720885	0.082383097	1
wormd20150203s7HK104AF16rt23w18r07	17	AF16.45	AF16	23	2/03/15	7	32.46280408	140	576.711111	0.43781806	0.63582022	0.082383097	1
wormd20150203s7HK104AF16rt23w18r08	17	AF16.45	AF16	23	2/03/15	8	33.52402857	283	612.625	0.29575791	0.6771055	0.082383097	1
wormd20150203s7HK104AF16rt23w18r09	17	AF16.45	AF16	23	2/03/15	9	34.58525306	265	557.632353	0.20439118	0.6664658	0.082383097	1
wormd20150203s7HK104AF16rt23w18r10	17	AF16.45	AF16	23	2/03/15	10	35.64647755	293	573.963333	0.11259334	0.2775412	0.082383097	1
wormd20150203s7HK104AF16rt23w18r11	17	AF16.45	AF16	23	2/03/15	11	36.70770204	175	552.672222	0.09849413	0.12132171	0.082383097	0
wormd20150203s7HK104AF16rt23w18r12	17	AF16.45	AF16	23	2/03/15	12	37.76892653	228	614.876596	0.07721902	0.09848066	0.082383097	0
wormd20150203s7HK104AF16rt23w18r13	17	AF16.45	AF16	23	2/03/15	13	38.83015102	293	660.936667	0.07842628	0.0823831	0.082383097	0
wormd20150203s7HK104AF16rt23w18r14	17	AF16.45	AF16	23	2/03/15	14	39.89137551	293	629.1	0.08597231	0.08610276	0.082383097	0
wormd20150203s7HK104AF16rt23w18r15	17	AF16.45	AF16	23	2/03/15	15	40.9526	293	580.24	0.08585385	0.08645263	0.082383097	0
wormd20150130s1AF16HK104rt23w01r00	0	AF16.1	AF16	23	1/30/15	0	25.03423265	250	252.828794	0.63776699	0.78549626	0.109472386	1
wormd20150130s1AF16HK104rt23w01r01	0	AF16.1	AF16	23	1/30/15	1	26.09545714	239	295.609756	0.66418327	0.79435836	0.109472386	1
wormd20150130s1AF16HK104rt23w01r02	0	AF16.1	AF16	23	1/30/15	2	27.15668163	269	318.344203	0.61463142	0.71840131	0.109472386	1
wormd20150130s1AF16HK104rt23w01r03	0	AF16.1	AF16	23	1/30/15	3	28.21790612	262	297.159851	0.65551182	0.76086853	0.109472386	1
wormd20150130s1AF16HK104rt23w01r04	0	AF16.1	AF16	23	1/30/15	4	29.27913061	263	275.959259	0.65910202	0.79417669	0.109472386	1
wormd20150130s1AF16HK104rt23w01r05	0	AF16.1	AF16	23	1/30/15	5	30.3403551	282	281.681661	0.59667042	0.66385111	0.109472386	1
wormd20150130s1AF16HK104rt23w01r06	0	AF16.1	AF16	23	1/30/15	6	31.40157959	286	272.40273	0.5995351	0.72398476	0.109472386	1
wormd20150130s1AF16HK104rt23w01r07	0	AF16.1	AF16	23	1/30/15	7	32.46280408	277	307.701068	0.38782591	0.74357904	0.109472386	1
wormd20150130s1AF16HK104rt23w01r08	0	AF16.1	AF16	23	1/30/15	8	33.52402857	292	286.916388	0.38134938	0.74020369	0.109472386	1
wormd20150130s1AF16HK104rt23w01r09	0	AF16.1	AF16	23	1/30/15	9	34.58525306	293	292.373333	0.08993589	0.10947239	0.109472386	0
wormd20150130s1AF16HK104rt23w01r10	0	AF16.1	AF16	23	1/30/15	10	35.64647755	290	296.094276	0.29758133	0.79543639	0.109472386	1
wormd20150130s1AF16HK104rt23w01r11	0	AF16.1	AF16	23	1/30/15	11	36.70770204	290	340.245791	0.15395344	0.49470852	0.109472386	1
wormd20150130s1AF16HK104rt23w01r12	0	AF16.1	AF16	23	1/30/15	12	37.76892653	293	335.696667	0.13775048	0.23523478	0.109472386	1
wormd20150130s1AF16HK104rt23w01r13	0	AF16.1	AF16	23	1/30/15	13	38.83015102	293	387.363333	0.12030128	0.11878862	0.109472386	0
wormd20150130s1AF16HK104rt23w01r14	0	AF16.1	AF16	23	1/30/15	14	39.89137551	293	366.48	0.12034892	0.11982465	0.109472386	0
wormd20150130s1AF16HK104rt23w01r15	0	AF16.1	AF16	23	1/30/15	15	40.9526	293	247.59	0.13429925	0.13367101	0.109472386	0
wormd20150130s1AF16HK104rt23w02r00	1	AF16.2	AF16	23	1/30/15	0	25.03423265	289	261.777027	0.61955067	0.69236461	0.057135935	1
wormd20150130s1AF16HK104rt23w02r01	1	AF16.2	AF16	23	1/30/15	1	26.09545714	292	313.401338	0.51642875	0.65069155	0.057135935	1
wormd20150130s1AF16HK104rt23w02r02	1	AF16.2	AF16	23	1/30/15	2	27.15668163	257	230.162879	0.70453301	0.77556144	0.057135935	1
wormd20150130s1AF16HK104rt23w02r03	1	AF16.2	AF16	23	1/30/15	3	28.21790612	289	254.175676	0.61155696	0.67718028	0.057135935	1
wormd20150130s1AF16HK104rt23w02r04	1	AF16.2	AF16	23	1/30/15	4	29.27913061	287	270.106164	0.52191898	0.68625911	0.057135935	1
wormd20150130s1AF16HK104rt23w02r05	1	AF16.2	AF16	23	1/30/15	5	30.3403551	289	240.341216	0.45706934	0.75879258	0.057135935	1
wormd20150130s1AF16HK104rt23w02r06	1	AF16.2	AF16	23	1/30/15	6	31.40157959	290	262.719595	0.50339307	0.68746632	0.057135935	1
wormd20150130s1AF16HK104rt23w02r07	1	AF16.2	AF16	23	1/30/15	7	32.46280408	293	297.586667	0.37191396	0.70284223	0.057135935	1
wormd20150130s1AF16HK104rt23w02r08	1	AF16.2	AF16	23	1/30/15	8	33.52402857	282	264.948097	0.34735146	0.60400996	0.057135935	1
wormd20150130s1AF16HK104rt23w02r09	1	AF16.2	AF16	23	1/30/15	9	34.58525306	293	225.136667	0.09657731	0.10644577	0.057135935	0
wormd20150130s1AF16HK104rt23w02r10	1	AF16.2	AF16	23	1/30/15	10	35.64647755	293	339.933333	0.06471148	0.07593978	0.057135935	0
wormd20150130s1AF16HK104rt23w02r11	1	AF16.2	AF16	23	1/30/15	11	36.70770204	293	316.133333	0.05472064	0.05713593	0.057135935	0
wormd20150130s1AF16HK104rt23w02r12	1	AF16.2	AF16	23	1/30/15	12	37.76892653	293	307.983333	0.06454453	0.06760203	0.057135935	0
wormd20150130s1AF16HK104rt23w02r13	1	AF16.2	AF16	23	1/30/15	13	38.83015102	293	301.466667	0.06894348	0.06811903	0.057135935	0
wormd20150130s1AF16HK104rt23w02r14	1	AF16.2	AF16	23	1/30/15	14	39.89137551	293	288.5	0.07815573	0.07622442	0.057135935	0
wormd20150130s1AF16HK104rt23w02r15	1	AF16.2	AF16	23	1/30/15	15	40.9526	293	279.65	0.07237537	0.07217552	0.057135935	0
wormd20150130s1AF16HK104rt23w03r00	2	AF16.3	AF16	23	1/30/15	0	25.03423265	277	276.419014	0.67497469	0.79316625	0.083730061	1
wormd20150130s1AF16HK104rt23w03r01	2	AF16.3	AF16	23	1/30/15	1	26.09545714	273	310.635714	0.70009595	0.7908948	0.083730061	1
wormd20150130s1AF16HK104rt23w03r02	2	AF16.3	AF16	23	1/30/15	2	27.15668163	286	266.955631	0.69015553	0.80080224	0.083730061	1
wormd20150130s1AF16HK104rt23w03r03	2	AF16.3	AF16	23	1/30/15	3	28.21790612	252	280	0.72207404	0.75570124	0.083730061	1
wormd20150130s1AF16HK104rt23w03r04	2	AF16.3	AF16	23	1/30/15	4	29.27913061	279	302.335664	0.63809285	0.74722109	0.083730061	1
wormd20150130s1AF16HK104rt23w03r05	2	AF16.3	AF16	23	1/30/15	5	30.3403551	279	274.185965	0.60745514	0.72728014	0.083730061	1
wormd20150130s1AF16HK104rt23w03r06	2	AF16.3	AF16	23	1/30/15	6	31.40157959	284	258.329897	0.53814503	0.76041187	0.083730061	1
wormd20150130s1AF16HK104rt23w03r07	2	AF16.3	AF16	23	1/30/15	7	32.46280408	172	269.909091	0.4651607	0.80690724	0.083730061	1
wormd20150130s1AF16HK104rt23w03r08	2	AF16.3	AF16	23	1/30/15	8	33.52402857	208	289.144186	0.07976906	0.11092484	0.083730061	0
wormd20150130s1AF16HK104rt23w03r09	2	AF16.3	AF16	23	1/30/15	9	34.58525306	105	279.205357	0.10955847	0.38488973	0.083730061	1
wormd20150130s1AF16HK104rt23w03r10	2	AF16.3	AF16	23	1/30/15	10	35.64647755	113	304.137931	0.09325781	0.15826478	0.083730061	1
wormd20150130s1AF16HK104rt23w03r11	2	AF16.3	AF16	23	1/30/15	11	36.70770204	291	260.379195	0.11305399	0.33322784	0.083730061	1
wormd20150130s1AF16HK104rt23w03r12	2	AF16.3	AF16	23	1/30/15	12	37.76892653	293	274.393333	0.08353727	0.08373006	0.083730061	0
wormd20150130s1AF16HK104rt23w03r13	2	AF16.3	AF16	23	1/30/15	13	38.83015102	293	264.773333	0.09210897	0.09071263	0.083730061	0
wormd20150130s1AF16HK104rt23w03r14	2	AF16.3	AF16	23	1/30/15	14	39.89137551	293	236.893333	0.10442203	0.10104399	0.083730061	0
wormd20150130s1AF16HK104rt23w03r15	2	AF16.3	AF16	23	1/30/15	15	40.9526	293	232.833333	0.10221213	0.10172855	0.083730061	0
wormd20150130s1AF16HK104rt23w07r00	6	AF16.4	AF16	23	1/30/15	0	25.03423265	196	394.46798	0.47627362	0.62658227	0.073489235	1
wormd20150130s1AF16HK104rt23w07r01	6	AF16.4	AF16	23	1/30/15	1	26.09545714	200	440.697561	0.45729969	0.69783607	0.073489235	1
wormd20150130s1AF16HK104rt23w07r02	6	AF16.4	AF16	23	1/30/15	2	27.15668163	218	392.995536	0.56706699	0.69057593	0.073489235	1
wormd20150130s1AF16HK104rt23w07r03	6	AF16.4	AF16	23	1/30/15	3	28.21790612	180	457.740541	0.46200162	0.6350723	0.073489235	1
wormd20150130s1AF16HK104rt23w07r04	6	AF16.4	AF16	23	1/30/15	4	29.27913061	250	433.552529	0.48096185	0.64034482	0.073489235	1
wormd20150130s1AF16HK104rt23w07r05	6	AF16.4	AF16	23	1/30/15	5	30.3403551	235	453.175	0.4585611	0.59683908	0.073489235	1
wormd20150130s1AF16HK104rt23w07r06	6	AF16.4	AF16	23	1/30/15	6	31.40157959	205	465.538462	0.35293956	0.6239586	0.073489235	1
wormd20150130s1AF16HK104rt23w07r08	6	AF16.4	AF16	23	1/30/15	8	33.52402857	293	333.25	0.10769755	0.17226321	0.073489235	1
wormd20150130s1AF16HK104rt23w07r09	6	AF16.4	AF16	23	1/30/15	9	34.58525306	293	409.753333	0.07388174	0.09890671	0.073489235	0
wormd20150130s1AF16HK104rt23w07r10	6	AF16.4	AF16	23	1/30/15	10	35.64647755	293	452.826667	0.06648089	0.08027055	0.073489235	0
wormd20150130s1AF16HK104rt23w07r11	6	AF16.4	AF16	23	1/30/15	11	36.70770204	293	467.796667	0.07348146	0.08393812	0.073489235	0
wormd20150130s1AF16HK104rt23w07r12	6	AF16.4	AF16	23	1/30/15	12	37.76892653	293	445.543333	0.07196235	0.07348923	0.073489235	0
wormd20150130s1AF16HK104rt23w07r13	6	AF16.4	AF16	23	1/30/15	13	38.83015102	293	449.976667	0.07403744	0.07368891	0.073489235	0
wormd20150130s1AF16HK104rt23w07r14	6	AF16.4	AF16	23	1/30/15	14	39.89137551	293	431.043333	0.0758681	0.0752933	0.073489235	0
wormd20150130s1AF16HK104rt23w08r00	7	AF16.5	AF16	23	1/30/15	0	25.03423265	273	226.75	0.28552342	0.30555362	0.062144225	1
wormd20150130s1AF16HK104rt23w08r01	7	AF16.5	AF16	23	1/30/15	1	26.09545714	245	123.603175	0.05649995	0.06214423	0.062144225	0
wormd20150130s1AF16HK104rt23w08r02	7	AF16.5	AF16	23	1/30/15	2	27.15668163	104	140.209524	0.09541494	0.09683176	0.062144225	0
wormd20150130s1AF16HK104rt23w08r04	7	AF16.5	AF16	23	1/30/15	4	29.27913061	100	299.252427	0.33638608	0.4833635	0.062144225	1
wormd20150130s1AF16HK104rt23w08r05	7	AF16.5	AF16	23	1/30/15	5	30.3403551	189	124.398964	0.07102814	0.07437733	0.062144225	0
wormd20150130s1AF16HK104rt23w08r07	7	AF16.5	AF16	23	1/30/15	7	32.46280408	293	394.803333	0.07630905	0.10098486	0.062144225	0
wormd20150130s1AF16HK104rt23w08r08	7	AF16.5	AF16	23	1/30/15	8	33.52402857	293	418.506667	0.08642144	0.18431581	0.062144225	1
wormd20150130s1AF16HK104rt23w08r09	7	AF16.5	AF16	23	1/30/15	9	34.58525306	213	336.200803	0.22418104	0.57555797	0.062144225	1
wormd20150130s1AF16HK104rt23w08r10	7	AF16.5	AF16	23	1/30/15	10	35.64647755	293	295.913333	0.1003028	0.20515538	0.062144225	1
wormd20150130s1AF16HK104rt23w08r11	7	AF16.5	AF16	23	1/30/15	11	36.70770204	293	354.756667	0.09042174	0.17033991	0.062144225	1
wormd20150130s1AF16HK104rt23w08r12	7	AF16.5	AF16	23	1/30/15	12	37.76892653	293	386.616667	0.08254809	0.08823006	0.062144225	0
wormd20150130s1AF16HK104rt23w08r13	7	AF16.5	AF16	23	1/30/15	13	38.83015102	284	349.8	0.09147586	0.15145275	0.062144225	1
wormd20150130s1AF16HK104rt23w08r14	7	AF16.5	AF16	23	1/30/15	14	39.89137551	293	367.87	0.0869833	0.10260277	0.062144225	0
wormd20150130s1AF16HK104rt23w08r15	7	AF16.5	AF16	23	1/30/15	15	40.9526	293	321.336667	0.09439645	0.09680812	0.062144225	0
wormd20150130s1AF16HK104rt23w09r00	8	AF16.6	AF16	23	1/30/15	0	25.03423265	293	383.536667	0.51580896	0.66239659	0.102646187	1
wormd20150130s1AF16HK104rt23w09r01	8	AF16.6	AF16	23	1/30/15	1	26.09545714	277	358.735915	0.57453788	0.71797414	0.102646187	1
wormd20150130s1AF16HK104rt23w09r02	8	AF16.6	AF16	23	1/30/15	2	27.15668163	256	363.484733	0.57769559	0.70913076	0.102646187	1
wormd20150130s1AF16HK104rt23w09r03	8	AF16.6	AF16	23	1/30/15	3	28.21790612	274	366.021352	0.56125051	0.72199846	0.102646187	1
wormd20150130s1AF16HK104rt23w09r04	8	AF16.6	AF16	23	1/30/15	4	29.27913061	275	370.333333	0.57513434	0.71060446	0.102646187	1
wormd20150130s1AF16HK104rt23w09r05	8	AF16.6	AF16	23	1/30/15	5	30.3403551	275	384.62766	0.57193249	0.67448032	0.102646187	1
wormd20150130s1AF16HK104rt23w09r07	8	AF16.6	AF16	23	1/30/15	7	32.46280408	293	284.5	0.1290062	0.21537989	0.102646187	1
wormd20150130s1AF16HK104rt23w09r08	8	AF16.6	AF16	23	1/30/15	8	33.52402857	293	297.723333	0.12083276	0.14821427	0.102646187	1
wormd20150130s1AF16HK104rt23w09r10	8	AF16.6	AF16	23	1/30/15	10	35.64647755	172	323.226337	0.23602524	0.6944282	0.102646187	1
wormd20150130s1AF16HK104rt23w09r11	8	AF16.6	AF16	23	1/30/15	11	36.70770204	240	327.209559	0.10498817	0.10637147	0.102646187	0
wormd20150130s1AF16HK104rt23w09r12	8	AF16.6	AF16	23	1/30/15	12	37.76892653	285	337.772575	0.1120225	0.1163064	0.102646187	0
wormd20150130s1AF16HK104rt23w09r13	8	AF16.6	AF16	23	1/30/15	13	38.83015102	263	308.336735	0.10228991	0.10264619	0.102646187	0
wormd20150130s1AF16HK104rt23w13r00	12	AF16.7	AF16	23	1/30/15	0	25.03423265	287	473.387755	0.49871291	0.63272246	0.09184442	1
wormd20150130s1AF16HK104rt23w13r01	12	AF16.7	AF16	23	1/30/15	1	26.09545714	265	534.224265	0.48127239	0.65997578	0.09184442	1
wormd20150130s1AF16HK104rt23w13r02	12	AF16.7	AF16	23	1/30/15	2	27.15668163	280	498.627178	0.45975975	0.6526237	0.09184442	1
wormd20150130s1AF16HK104rt23w13r03	12	AF16.7	AF16	23	1/30/15	3	28.21790612	270	479.862816	0.46498611	0.62628081	0.09184442	1
wormd20150130s1AF16HK104rt23w13r04	12	AF16.7	AF16	23	1/30/15	4	29.27913061	284	451.738832	0.42546236	0.66823589	0.09184442	1
wormd20150130s1AF16HK104rt23w13r05	12	AF16.7	AF16	23	1/30/15	5	30.3403551	272	463.741935	0.51364113	0.65872832	0.09184442	1
wormd20150130s1AF16HK104rt23w13r06	12	AF16.7	AF16	23	1/30/15	6	31.40157959	275	434.652482	0.50062962	0.71090651	0.09184442	1
wormd20150130s1AF16HK104rt23w13r07	12	AF16.7	AF16	23	1/30/15	7	32.46280408	110	507.675214	0.23611038	0.51076298	0.09184442	1
wormd20150130s1AF16HK104rt23w13r08	12	AF16.7	AF16	23	1/30/15	8	33.52402857	267	575.609929	0.25425464	0.62943647	0.09184442	1
wormd20150130s1AF16HK104rt23w13r10	12	AF16.7	AF16	23	1/30/15	10	35.64647755	129	574.097015	0.08600967	0.14815205	0.09184442	1
wormd20150130s1AF16HK104rt23w13r11	12	AF16.7	AF16	23	1/30/15	11	36.70770204	293	492.483333	0.08253792	0.09802445	0.09184442	0
wormd20150130s1AF16HK104rt23w13r12	12	AF16.7	AF16	23	1/30/15	12	37.76892653	293	488.25	0.08953748	0.09688265	0.09184442	0
wormd20150130s1AF16HK104rt23w13r13	12	AF16.7	AF16	23	1/30/15	13	38.83015102	293	465.4	0.09500046	0.09363433	0.09184442	0
wormd20150130s1AF16HK104rt23w13r14	12	AF16.7	AF16	23	1/30/15	14	39.89137551	293	470.503333	0.09705389	0.09572948	0.09184442	0
wormd20150130s1AF16HK104rt23w13r15	12	AF16.7	AF16	23	1/30/15	15	40.9526	287	469.561224	0.09098287	0.09184442	0.09184442	0
wormd20150130s1AF16HK104rt23w14r00	13	AF16.8	AF16	23	1/30/15	0	25.03423265	293	440.223333	0.51530214	0.64650886	0.063154889	1
wormd20150130s1AF16HK104rt23w14r01	13	AF16.8	AF16	23	1/30/15	1	26.09545714	281	425.163194	0.48796719	0.65678567	0.063154889	1
wormd20150130s1AF16HK104rt23w14r02	13	AF16.8	AF16	23	1/30/15	2	27.15668163	223	317.082609	0.21106141	0.2488466	0.063154889	1
wormd20150130s1AF16HK104rt23w14r03	13	AF16.8	AF16	23	1/30/15	3	28.21790612	293	458.913333	0.46890923	0.65530182	0.063154889	1
wormd20150130s1AF16HK104rt23w14r04	13	AF16.8	AF16	23	1/30/15	4	29.27913061	277	329.879859	0.07963063	0.09681708	0.063154889	0
wormd20150130s1AF16HK104rt23w14r05	13	AF16.8	AF16	23	1/30/15	5	30.3403551	174	342.530726	0.12637302	0.14579484	0.063154889	1
wormd20150130s1AF16HK104rt23w14r06	13	AF16.8	AF16	23	1/30/15	6	31.40157959	241	336.885246	0.07395668	0.08759236	0.063154889	0
wormd20150130s1AF16HK104rt23w14r07	13	AF16.8	AF16	23	1/30/15	7	32.46280408	159	503.259036	0.06058568	0.06315489	0.063154889	0
wormd20150130s1AF16HK104rt23w14r08	13	AF16.8	AF16	23	1/30/15	8	33.52402857	243	498.492	0.06350809	0.07286455	0.063154889	0
wormd20150130s1AF16HK104rt23w14r09	13	AF16.8	AF16	23	1/30/15	9	34.58525306	293	334.19	0.07055722	0.07081617	0.063154889	0
wormd20150130s1AF16HK104rt23w14r10	13	AF16.8	AF16	23	1/30/15	10	35.64647755	293	336.436667	0.07053088	0.0699832	0.063154889	0
wormd20150130s1AF16HK104rt23w14r11	13	AF16.8	AF16	23	1/30/15	11	36.70770204	293	336.79	0.06969265	0.06954355	0.063154889	0
wormd20150130s1AF16HK104rt23w14r12	13	AF16.8	AF16	23	1/30/15	12	37.76892653	293	337.953333	0.0698183	0.06974962	0.063154889	0
wormd20150130s1AF16HK104rt23w14r13	13	AF16.8	AF16	23	1/30/15	13	38.83015102	293	338.55	0.07199925	0.07135813	0.063154889	0
wormd20150130s1AF16HK104rt23w14r14	13	AF16.8	AF16	23	1/30/15	14	39.89137551	293	339.116667	0.07037318	0.07005273	0.063154889	0
wormd20150130s1AF16HK104rt23w14r15	13	AF16.8	AF16	23	1/30/15	15	40.9526	293	340.01	0.07123722	0.0710543	0.063154889	0
wormd20150130s1AF16HK104rt23w15r00	14	AF16.9	AF16	23	1/30/15	0	25.03423265	293	351.333333	0.54728827	0.68189549	0.110674318	1
wormd20150130s1AF16HK104rt23w15r01	14	AF16.9	AF16	23	1/30/15	1	26.09545714	249	306.686508	0.56498393	0.6980629	0.110674318	1
wormd20150130s1AF16HK104rt23w15r02	14	AF16.9	AF16	23	1/30/15	2	27.15668163	257	331.287879	0.63965214	0.77338297	0.110674318	1
wormd20150130s1AF16HK104rt23w15r03	14	AF16.9	AF16	23	1/30/15	3	28.21790612	232	327.644351	0.61611213	0.71764315	0.110674318	1
wormd20150130s1AF16HK104rt23w15r04	14	AF16.9	AF16	23	1/30/15	4	29.27913061	256	337.832061	0.58887601	0.6989057	0.110674318	1
wormd20150130s1AF16HK104rt23w15r05	14	AF16.9	AF16	23	1/30/15	5	30.3403551	226	319.128755	0.52560217	0.69773448	0.110674318	1
wormd20150130s1AF16HK104rt23w15r06	14	AF16.9	AF16	23	1/30/15	6	31.40157959	278	380.905263	0.48905663	0.6425522	0.110674318	1
wormd20150130s1AF16HK104rt23w15r07	14	AF16.9	AF16	23	1/30/15	7	32.46280408	157	355.859756	0.41649654	0.63732097	0.110674318	1
wormd20150130s1AF16HK104rt23w15r08	14	AF16.9	AF16	23	1/30/15	8	33.52402857	102	304.155963	0.16574066	0.39838074	0.110674318	1
wormd20150130s1AF16HK104rt23w15r09	14	AF16.9	AF16	23	1/30/15	9	34.58525306	136	323.546099	0.12242015	0.25884746	0.110674318	1
wormd20150130s1AF16HK104rt23w15r10	14	AF16.9	AF16	23	1/30/15	10	35.64647755	293	280.013333	0.11324947	0.11460165	0.110674318	0
wormd20150130s1AF16HK104rt23w15r11	14	AF16.9	AF16	23	1/30/15	11	36.70770204	293	279.14	0.11106354	0.11328519	0.110674318	0
wormd20150130s1AF16HK104rt23w15r12	14	AF16.9	AF16	23	1/30/15	12	37.76892653	293	278.08	0.12107681	0.12139735	0.110674318	0
wormd20150130s1AF16HK104rt23w15r13	14	AF16.9	AF16	23	1/30/15	13	38.83015102	291	271.516779	0.12877393	0.13098621	0.110674318	0
wormd20150130s1AF16HK104rt23w15r14	14	AF16.9	AF16	23	1/30/15	14	39.89137551	199	480.618182	0.11087719	0.11067432	0.110674318	0
wormd20150130s2AHAF16rt23w04r00	3	AF16.10	AF16	23	1/30/15	0	25.03423265	271	447.21223	0.50478388	0.62616095	0.145960632	1
wormd20150130s2AHAF16rt23w04r01	3	AF16.10	AF16	23	1/30/15	1	26.09545714	133	453.15	0.48561028	0.64054325	0.145960632	1
wormd20150130s2AHAF16rt23w04r03	3	AF16.10	AF16	23	1/30/15	3	28.21790612	134	455.607407	0.52378078	0.65861738	0.145960632	1
wormd20150130s2AHAF16rt23w04r04	3	AF16.10	AF16	23	1/30/15	4	29.27913061	165	437.107784	0.49575013	0.68298848	0.145960632	1
wormd20150130s2AHAF16rt23w04r05	3	AF16.10	AF16	23	1/30/15	5	30.3403551	211	428.844037	0.45308741	0.65680243	0.145960632	1
wormd20150130s2AHAF16rt23w04r06	3	AF16.10	AF16	23	1/30/15	6	31.40157959	283	410.159722	0.50238667	0.69666237	0.145960632	1
wormd20150130s2AHAF16rt23w04r07	3	AF16.10	AF16	23	1/30/15	7	32.46280408	275	448.312057	0.43651366	0.63327655	0.145960632	1
wormd20150130s2AHAF16rt23w04r09	3	AF16.10	AF16	23	1/30/15	9	34.58525306	263	455.703704	0.13515241	0.14596063	0.145960632	1
wormd20150130s2AHAF16rt23w04r10	3	AF16.10	AF16	23	1/30/15	10	35.64647755	216	426.422222	0.16246861	0.56418035	0.145960632	1
wormd20150130s2AHAF16rt23w05r00	4	AF16.11	AF16	23	1/30/15	0	25.03423265	233	494.638655	0.47229749	0.61135937	0.128704145	1
wormd20150130s2AHAF16rt23w05r01	4	AF16.11	AF16	23	1/30/15	1	26.09545714	171	495.482955	0.37982795	0.65501413	0.128704145	1
wormd20150130s2AHAF16rt23w05r02	4	AF16.11	AF16	23	1/30/15	2	27.15668163	117	483.347107	0.44851317	0.60026437	0.128704145	1
wormd20150130s2AHAF16rt23w05r03	4	AF16.11	AF16	23	1/30/15	3	28.21790612	127	140.619403	0.19539055	0.23267179	0.128704145	1
wormd20150130s2AHAF16rt23w05r04	4	AF16.11	AF16	23	1/30/15	4	29.27913061	269	153.85348	0.14446971	0.1534436	0.128704145	1
wormd20150130s2AHAF16rt23w05r05	4	AF16.11	AF16	23	1/30/15	5	30.3403551	273	182.420863	0.12745085	0.13191785	0.128704145	0
wormd20150130s2AHAF16rt23w05r07	4	AF16.11	AF16	23	1/30/15	7	32.46280408	152	239	0.13463484	0.15651235	0.128704145	1
wormd20150130s2AHAF16rt23w05r08	4	AF16.11	AF16	23	1/30/15	8	33.52402857	229	262.215768	0.12604562	0.14591596	0.128704145	1
wormd20150130s2AHAF16rt23w05r09	4	AF16.11	AF16	23	1/30/15	9	34.58525306	226	280.081545	0.12549721	0.14612472	0.128704145	1
wormd20150130s2AHAF16rt23w05r10	4	AF16.11	AF16	23	1/30/15	10	35.64647755	212	301.368201	0.1213433	0.13322731	0.128704145	0
wormd20150130s2AHAF16rt23w05r11	4	AF16.11	AF16	23	1/30/15	11	36.70770204	223	323.777293	0.12635746	0.15511009	0.128704145	1
wormd20150130s2AHAF16rt23w05r12	4	AF16.11	AF16	23	1/30/15	12	37.76892653	230	378.330508	0.14320351	0.17044815	0.128704145	1
wormd20150130s2AHAF16rt23w05r13	4	AF16.11	AF16	23	1/30/15	13	38.83015102	256	372.365019	0.1434973	0.14866881	0.128704145	1
wormd20150130s2AHAF16rt23w05r14	4	AF16.11	AF16	23	1/30/15	14	39.89137551	250	434.507813	0.1286294	0.14523396	0.128704145	1
wormd20150130s2AHAF16rt23w05r15	4	AF16.11	AF16	23	1/30/15	15	40.9526	270	453.184783	0.12689209	0.12870414	0.128704145	0
wormd20150130s2AHAF16rt23w06r00	5	AF16.12	AF16	23	1/30/15	0	25.03423265	291	395.510067	0.51741776	0.68001053	0.027913743	1
wormd20150130s2AHAF16rt23w06r01	5	AF16.12	AF16	23	1/30/15	1	26.09545714	268	433.142336	0.50854338	0.65919476	0.027913743	1
wormd20150130s2AHAF16rt23w06r02	5	AF16.12	AF16	23	1/30/15	2	27.15668163	293	459.09	0.4610137	0.63695951	0.027913743	1
wormd20150130s2AHAF16rt23w06r03	5	AF16.12	AF16	23	1/30/15	3	28.21790612	289	387.952218	0.58352694	0.70669333	0.027913743	1
wormd20150130s2AHAF16rt23w06r04	5	AF16.12	AF16	23	1/30/15	4	29.27913061	218	489.991071	0.46987351	0.59263564	0.027913743	1
wormd20150130s2AHAF16rt23w06r05	5	AF16.12	AF16	23	1/30/15	5	30.3403551	252	475.673228	0.47889094	0.59211335	0.027913743	1
wormd20150130s2AHAF16rt23w06r06	5	AF16.12	AF16	23	1/30/15	6	31.40157959	293	463.63	0.35411691	0.57545293	0.027913743	1
wormd20150130s2AHAF16rt23w06r07	5	AF16.12	AF16	23	1/30/15	7	32.46280408	186	70.8186528	0.01140494	0.02791374	0.027913743	0
wormd20150130s2AHAF16rt23w06r08	5	AF16.12	AF16	23	1/30/15	8	33.52402857	249	447.960784	0.08230818	0.112636	0.027913743	0
wormd20150130s2AHAF16rt23w06r12	5	AF16.12	AF16	23	1/30/15	12	37.76892653	194	370.144279	0.08029518	0.08219723	0.027913743	0
wormd20150130s2AHAF16rt23w06r13	5	AF16.12	AF16	23	1/30/15	13	38.83015102	293	396.306667	0.09466628	0.0931471	0.027913743	0
wormd20150130s2AHAF16rt23w06r14	5	AF16.12	AF16	23	1/30/15	14	39.89137551	293	401.123333	0.09469256	0.09522688	0.027913743	0
wormd20150130s2AHAF16rt23w06r15	5	AF16.12	AF16	23	1/30/15	15	40.9526	293	405.336667	0.08620425	0.08462875	0.027913743	0
wormd20150130s2AHAF16rt23w10r00	9	AF16.13	AF16	23	1/30/15	0	25.03423265	270	428.061372	0.53518817	0.66703394	0.08899747	1
wormd20150130s2AHAF16rt23w10r01	9	AF16.13	AF16	23	1/30/15	1	26.09545714	125	436.704545	0.48747152	0.61820804	0.08899747	1
wormd20150130s2AHAF16rt23w10r02	9	AF16.13	AF16	23	1/30/15	2	27.15668163	145	448.341772	0.53584876	0.67168709	0.08899747	1
wormd20150130s2AHAF16rt23w10r05	9	AF16.13	AF16	23	1/30/15	5	30.3403551	114	127.905512	0.17460394	0.18499304	0.08899747	1
wormd20150130s2AHAF16rt23w10r07	9	AF16.13	AF16	23	1/30/15	7	32.46280408	153	434.79375	0.3971123	0.60712285	0.08899747	1
wormd20150130s2AHAF16rt23w10r10	9	AF16.13	AF16	23	1/30/15	10	35.64647755	263	392.12963	0.12892233	0.33003574	0.08899747	1
wormd20150130s2AHAF16rt23w10r12	9	AF16.13	AF16	23	1/30/15	12	37.76892653	135	213.922535	0.09842667	0.0975041	0.08899747	0
wormd20150130s2AHAF16rt23w10r13	9	AF16.13	AF16	23	1/30/15	13	38.83015102	132	216.848921	0.09983126	0.09831387	0.08899747	0
wormd20150130s2AHAF16rt23w10r14	9	AF16.13	AF16	23	1/30/15	14	39.89137551	123	225.038462	0.09006504	0.0914485	0.08899747	0
wormd20150130s2AHAF16rt23w10r15	9	AF16.13	AF16	23	1/30/15	15	40.9526	118	228.658537	0.09055266	0.08899747	0.08899747	0
wormd20150130s2AHAF16rt23w11r00	10	AF16.14	AF16	23	1/30/15	0	25.03423265	272	513.562724	0.47656089	0.55743836	0.005726686	1
wormd20150130s2AHAF16rt23w11r01	10	AF16.14	AF16	23	1/30/15	1	26.09545714	144	494.719178	0.46065641	0.55618438	0.005726686	1
wormd20150130s2AHAF16rt23w11r02	10	AF16.14	AF16	23	1/30/15	2	27.15668163	134	522.576642	0.45937854	0.56088005	0.005726686	1
wormd20150130s2AHAF16rt23w11r03	10	AF16.14	AF16	23	1/30/15	3	28.21790612	293	511.793333	0.41213619	0.56102445	0.005726686	1
wormd20150130s2AHAF16rt23w11r05	10	AF16.14	AF16	23	1/30/15	5	30.3403551	222	486.951542	0.4171954	0.64203827	0.005726686	1
wormd20150130s2AHAF16rt23w11r06	10	AF16.14	AF16	23	1/30/15	6	31.40157959	108	443.531034	0.36494693	0.68963644	0.005726686	1
wormd20150130s2AHAF16rt23w11r07	10	AF16.14	AF16	23	1/30/15	7	32.46280408	149	113.63871	0.00560558	0.00572669	0.005726686	0
wormd20150130s2AHAF16rt23w11r10	10	AF16.14	AF16	23	1/30/15	10	35.64647755	110	91.7913043	0.03871416	0.04476053	0.005726686	0
wormd20150130s2AHAF16rt23w11r11	10	AF16.14	AF16	23	1/30/15	11	36.70770204	293	486.34	0.09997823	0.15912191	0.005726686	1
wormd20150130s2AHAF16rt23w11r12	10	AF16.14	AF16	23	1/30/15	12	37.76892653	293	475.133333	0.08497039	0.08720935	0.005726686	0
wormd20150130s2AHAF16rt23w11r13	10	AF16.14	AF16	23	1/30/15	13	38.83015102	293	444.866667	0.10514256	0.1255532	0.005726686	0
wormd20150130s2AHAF16rt23w11r14	10	AF16.14	AF16	23	1/30/15	14	39.89137551	276	446.028269	0.10470951	0.12027043	0.005726686	0
wormd20150130s2AHAF16rt23w11r15	10	AF16.14	AF16	23	1/30/15	15	40.9526	293	437.453333	0.09500878	0.09614731	0.005726686	0
wormd20150130s2AHAF16rt23w12r00	11	AF16.15	AF16	23	1/30/15	0	25.03423265	189	349.109948	0.56616442	0.66536536	0.124724714	1
wormd20150130s2AHAF16rt23w12r01	11	AF16.15	AF16	23	1/30/15	1	26.09545714	276	384.16726	0.54561957	0.72782674	0.124724714	1
wormd20150130s2AHAF16rt23w12r03	11	AF16.15	AF16	23	1/30/15	3	28.21790612	162	400.981707	0.54127817	0.71221489	0.124724714	1
wormd20150130s2AHAF16rt23w12r06	11	AF16.15	AF16	23	1/30/15	6	31.40157959	197	366.505	0.49140701	0.58398966	0.124724714	1
wormd20150130s2AHAF16rt23w12r07	11	AF16.15	AF16	23	1/30/15	7	32.46280408	104	360.738318	0.46079837	0.5782915	0.124724714	1
wormd20150130s2AHAF16rt23w12r08	11	AF16.15	AF16	23	1/30/15	8	33.52402857	130	492.067669	0.22285537	0.50467908	0.124724714	1
wormd20150130s2AHAF16rt23w12r09	11	AF16.15	AF16	23	1/30/15	9	34.58525306	260	400.985019	0.10890004	0.13797276	0.124724714	0
wormd20150130s2AHAF16rt23w12r11	11	AF16.15	AF16	23	1/30/15	11	36.70770204	293	428.453333	0.12037445	0.15105882	0.124724714	1
wormd20150130s2AHAF16rt23w12r12	11	AF16.15	AF16	23	1/30/15	12	37.76892653	293	437.89	0.12021269	0.12484877	0.124724714	0
wormd20150130s2AHAF16rt23w12r13	11	AF16.15	AF16	23	1/30/15	13	38.83015102	293	372.353333	0.13238965	0.13314738	0.124724714	0
wormd20150130s2AHAF16rt23w12r14	11	AF16.15	AF16	23	1/30/15	14	39.89137551	261	341.074324	0.13223265	0.13445136	0.124724714	0
wormd20150130s2AHAF16rt23w12r15	11	AF16.15	AF16	23	1/30/15	15	40.9526	293	367.106667	0.12474859	0.12472471	0.124724714	0
wormd20150130s2AHAF16rt23w16r00	15	AF16.16	AF16	23	1/30/15	0	25.03423265	264	436.345725	0.48434827	0.63565712	0.110380446	1
wormd20150130s2AHAF16rt23w16r01	15	AF16.16	AF16	23	1/30/15	1	26.09545714	136	447.721429	0.49429229	0.60826164	0.110380446	1
wormd20150130s2AHAF16rt23w16r02	15	AF16.16	AF16	23	1/30/15	2	27.15668163	142	306.979452	0.28802657	0.46156578	0.110380446	1
wormd20150130s2AHAF16rt23w16r03	15	AF16.16	AF16	23	1/30/15	3	28.21790612	280	435.731707	0.44385824	0.6109086	0.110380446	1
wormd20150130s2AHAF16rt23w16r04	15	AF16.16	AF16	23	1/30/15	4	29.27913061	194	431.771144	0.42225461	0.553623	0.110380446	1
wormd20150130s2AHAF16rt23w16r05	15	AF16.16	AF16	23	1/30/15	5	30.3403551	158	423.229814	0.36405239	0.57790563	0.110380446	1
wormd20150130s2AHAF16rt23w16r06	15	AF16.16	AF16	23	1/30/15	6	31.40157959	106	375.275229	0.27660662	0.34863151	0.110380446	1
wormd20150130s2AHAF16rt23w16r07	15	AF16.16	AF16	23	1/30/15	7	32.46280408	148	377	0.36996291	0.55062979	0.110380446	1
wormd20150130s2AHAF16rt23w16r08	15	AF16.16	AF16	23	1/30/15	8	33.52402857	293	465.716667	0.26847603	0.57464373	0.110380446	1
wormd20150130s2AHAF16rt23w16r09	15	AF16.16	AF16	23	1/30/15	9	34.58525306	102	411.31068	0.17383361	0.41111015	0.110380446	1
wormd20150130s2AHAF16rt23w16r10	15	AF16.16	AF16	23	1/30/15	10	35.64647755	293	428.796667	0.19701595	0.51920717	0.110380446	1
wormd20150130s2AHAF16rt23w16r11	15	AF16.16	AF16	23	1/30/15	11	36.70770204	293	412.243333	0.11674088	0.29558924	0.110380446	1
wormd20150130s2AHAF16rt23w16r12	15	AF16.16	AF16	23	1/30/15	12	37.76892653	293	356.203333	0.11047411	0.11038045	0.110380446	0
wormd20150130s2AHAF16rt23w16r13	15	AF16.16	AF16	23	1/30/15	13	38.83015102	293	307.113333	0.12683354	0.13038896	0.110380446	0
wormd20150130s2AHAF16rt23w16r14	15	AF16.16	AF16	23	1/30/15	14	39.89137551	255	323.312977	0.12060838	0.12029449	0.110380446	0
wormd20150130s2AHAF16rt23w17r00	16	AF16.17	AF16	23	1/30/15	0	25.03423265	198	457.404878	0.48674883	0.61532148	0.087922287	1
wormd20150130s2AHAF16rt23w17r01	16	AF16.17	AF16	23	1/30/15	1	26.09545714	233	496.183761	0.47411546	0.60458393	0.087922287	1
wormd20150130s2AHAF16rt23w17r05	16	AF16.17	AF16	23	1/30/15	5	30.3403551	173	445.581921	0.49163678	0.65037965	0.087922287	1
wormd20150130s2AHAF16rt23w17r06	16	AF16.17	AF16	23	1/30/15	6	31.40157959	170	456.589595	0.46732419	0.64774417	0.087922287	1
wormd20150130s2AHAF16rt23w17r07	16	AF16.17	AF16	23	1/30/15	7	32.46280408	293	542.756667	0.28756952	0.52145224	0.087922287	1
wormd20150130s2AHAF16rt23w17r10	16	AF16.17	AF16	23	1/30/15	10	35.64647755	108	417.112903	0.22093971	0.63275296	0.087922287	1
wormd20150130s2AHAF16rt23w17r11	16	AF16.17	AF16	23	1/30/15	11	36.70770204	293	545.653333	0.09323968	0.11603342	0.087922287	0
wormd20150130s2AHAF16rt23w17r12	16	AF16.17	AF16	23	1/30/15	12	37.76892653	293	486.92	0.10768469	0.16125668	0.087922287	1
wormd20150130s2AHAF16rt23w17r13	16	AF16.17	AF16	23	1/30/15	13	38.83015102	293	476.146667	0.10568588	0.10780563	0.087922287	0
wormd20150130s2AHAF16rt23w17r14	16	AF16.17	AF16	23	1/30/15	14	39.89137551	293	486.846667	0.10065337	0.11160958	0.087922287	0
wormd20150130s2AHAF16rt23w17r15	16	AF16.17	AF16	23	1/30/15	15	40.9526	293	507.56	0.08849592	0.08792229	0.087922287	0
wormd20150130s2AHAF16rt23w18r00	17	AF16.18	AF16	23	1/30/15	0	25.03423265	181	404.789189	0.50666344	0.62459467	0.040667144	1
wormd20150130s2AHAF16rt23w18r01	17	AF16.18	AF16	23	1/30/15	1	26.09545714	267	543.551095	0.42484587	0.58516989	0.040667144	1
wormd20150130s2AHAF16rt23w18r02	17	AF16.18	AF16	23	1/30/15	2	27.15668163	229	456.918803	0.45691883	0.60044276	0.040667144	1
wormd20150130s2AHAF16rt23w18r03	17	AF16.18	AF16	23	1/30/15	3	28.21790612	281	525.790941	0.47407683	0.60905943	0.040667144	1
wormd20150130s2AHAF16rt23w18r04	17	AF16.18	AF16	23	1/30/15	4	29.27913061	273	458.596429	0.42082679	0.63121018	0.040667144	1
wormd20150130s2AHAF16rt23w18r05	17	AF16.18	AF16	23	1/30/15	5	30.3403551	100	627.078431	0.29024003	0.50517347	0.040667144	1
wormd20150130s2AHAF16rt23w18r06	17	AF16.18	AF16	23	1/30/15	6	31.40157959	137	500.471429	0.29960197	0.58937346	0.040667144	1
wormd20150130s2AHAF16rt23w18r08	17	AF16.18	AF16	23	1/30/15	8	33.52402857	135	464.098592	0.18389289	0.40269886	0.040667144	1
wormd20150130s2AHAF16rt23w18r11	17	AF16.18	AF16	23	1/30/15	11	36.70770204	111	447.627119	0.10233212	0.14458282	0.040667144	1
wormd20150130s2AHAF16rt23w18r13	17	AF16.18	AF16	23	1/30/15	13	38.83015102	141	98.1232877	0.03975122	0.04066714	0.040667144	0
wormd20150130s2AHAF16rt23w18r14	17	AF16.18	AF16	23	1/30/15	14	39.89137551	258	99.0150943	0.04576016	0.0467741	0.040667144	0
wormd20150130s2AHAF16rt23w18r15	17	AF16.18	AF16	23	1/30/15	15	40.9526	272	99.3476703	0.0435607	0.04359384	0.040667144	0
wormd20150130s4HAAF16rt23w04r00	3	AF16.19	AF16	23	1/30/15	0	25.03423265	291	359.634228	0.53464364	0.69412343	0.015016693	1
wormd20150130s4HAAF16rt23w04r01	3	AF16.19	AF16	23	1/30/15	1	26.09545714	251	342.573643	0.51521799	0.75447639	0.015016693	1
wormd20150130s4HAAF16rt23w04r02	3	AF16.19	AF16	23	1/30/15	2	27.15668163	256	364.428016	0.55082294	0.72140283	0.015016693	1
wormd20150130s4HAAF16rt23w04r03	3	AF16.19	AF16	23	1/30/15	3	28.21790612	244	348.952191	0.49385724	0.6131792	0.015016693	1
wormd20150130s4HAAF16rt23w04r04	3	AF16.19	AF16	23	1/30/15	4	29.27913061	216	308.47032	0.4653407	0.59785267	0.015016693	1
wormd20150130s4HAAF16rt23w04r05	3	AF16.19	AF16	23	1/30/15	5	30.3403551	132	215.744526	0.2023814	0.29771351	0.015016693	1
wormd20150130s4HAAF16rt23w04r06	3	AF16.19	AF16	23	1/30/15	6	31.40157959	146	146.609272	0.01964528	0.05078561	0.015016693	0
wormd20150130s4HAAF16rt23w04r07	3	AF16.19	AF16	23	1/30/15	7	32.46280408	177	221.005464	0.0361236	0.04745097	0.015016693	0
wormd20150130s4HAAF16rt23w04r08	3	AF16.19	AF16	23	1/30/15	8	33.52402857	154	344.352201	0.30494722	0.51027323	0.015016693	1
wormd20150130s4HAAF16rt23w04r09	3	AF16.19	AF16	23	1/30/15	9	34.58525306	184	228.539683	0.01697003	0.01645733	0.015016693	0
wormd20150130s4HAAF16rt23w04r10	3	AF16.19	AF16	23	1/30/15	10	35.64647755	270	213.624549	0.01417588	0.01501669	0.015016693	0
wormd20150130s4HAAF16rt23w04r11	3	AF16.19	AF16	23	1/30/15	11	36.70770204	252	215.478599	0.02010349	0.0194403	0.015016693	0
wormd20150130s4HAAF16rt23w04r12	3	AF16.19	AF16	23	1/30/15	12	37.76892653	163	220.196429	0.0502721	0.05004623	0.015016693	0
wormd20150130s4HAAF16rt23w04r13	3	AF16.19	AF16	23	1/30/15	13	38.83015102	235	209.264463	0.05954332	0.0617166	0.015016693	0
wormd20150130s4HAAF16rt23w04r14	3	AF16.19	AF16	23	1/30/15	14	39.89137551	256	188.988506	0.04499221	0.05500162	0.015016693	0
wormd20150130s4HAAF16rt23w04r15	3	AF16.19	AF16	23	1/30/15	15	40.9526	266	212.676471	0.04487602	0.04404734	0.015016693	0
wormd20150130s4HAAF16rt23w05r00	4	AF16.20	AF16	23	1/30/15	0	25.03423265	285	418.85274	0.51474568	0.58894218	0.133646061	1
wormd20150130s4HAAF16rt23w05r01	4	AF16.20	AF16	23	1/30/15	1	26.09545714	293	433.176667	0.46093287	0.65926	0.133646061	1
wormd20150130s4HAAF16rt23w05r02	4	AF16.20	AF16	23	1/30/15	2	27.15668163	213	449.131818	0.46023782	0.58135014	0.133646061	1
wormd20150130s4HAAF16rt23w05r03	4	AF16.20	AF16	23	1/30/15	3	28.21790612	130	417.819549	0.44581306	0.52841484	0.133646061	1
wormd20150130s4HAAF16rt23w05r04	4	AF16.20	AF16	23	1/30/15	4	29.27913061	147	436.623377	0.54098674	0.64743285	0.133646061	1
wormd20150130s4HAAF16rt23w05r05	4	AF16.20	AF16	23	1/30/15	5	30.3403551	247	419.877953	0.52011247	0.63019567	0.133646061	1
wormd20150130s4HAAF16rt23w05r06	4	AF16.20	AF16	23	1/30/15	6	31.40157959	227	417.940171	0.47498196	0.6175598	0.133646061	1
wormd20150130s4HAAF16rt23w05r08	4	AF16.20	AF16	23	1/30/15	8	33.52402857	159	382.759036	0.32367148	0.55339936	0.133646061	1
wormd20150130s4HAAF16rt23w05r09	4	AF16.20	AF16	23	1/30/15	9	34.58525306	127	435.992537	0.3286179	0.56750057	0.133646061	1
wormd20150130s4HAAF16rt23w05r10	4	AF16.20	AF16	23	1/30/15	10	35.64647755	116	460.601626	0.13164605	0.2153972	0.133646061	1
wormd20150130s4HAAF16rt23w05r13	4	AF16.20	AF16	23	1/30/15	13	38.83015102	289	465.452381	0.13375278	0.13411204	0.133646061	0
wormd20150130s4HAAF16rt23w05r14	4	AF16.20	AF16	23	1/30/15	14	39.89137551	293	464.123333	0.13407087	0.13500773	0.133646061	0
wormd20150130s4HAAF16rt23w05r15	4	AF16.20	AF16	23	1/30/15	15	40.9526	293	466.23	0.13445283	0.13364606	0.133646061	0
wormd20150130s4HAAF16rt23w06r00	5	AF16.21	AF16	23	1/30/15	0	25.03423265	293	587.22	0.38132029	0.56548024	0.094563618	1
wormd20150130s4HAAF16rt23w06r01	5	AF16.21	AF16	23	1/30/15	1	26.09545714	243	541.856	0.37031003	0.50434245	0.094563618	1
wormd20150130s4HAAF16rt23w06r02	5	AF16.21	AF16	23	1/30/15	2	27.15668163	192	557.472362	0.39972845	0.59021934	0.094563618	1
wormd20150130s4HAAF16rt23w06r04	5	AF16.21	AF16	23	1/30/15	4	29.27913061	126	121.589147	0.19073314	0.20450288	0.094563618	1
wormd20150130s4HAAF16rt23w06r05	5	AF16.21	AF16	23	1/30/15	5	30.3403551	247	141.146245	0.18226142	0.19326663	0.094563618	1
wormd20150130s4HAAF16rt23w06r06	5	AF16.21	AF16	23	1/30/15	6	31.40157959	285	180.85274	0.15589875	0.15719896	0.094563618	1
wormd20150130s4HAAF16rt23w06r07	5	AF16.21	AF16	23	1/30/15	7	32.46280408	293	218.076667	0.13874719	0.13972997	0.094563618	0
wormd20150130s4HAAF16rt23w06r08	5	AF16.21	AF16	23	1/30/15	8	33.52402857	293	245.35	0.13444996	0.13454278	0.094563618	0
wormd20150130s4HAAF16rt23w06r09	5	AF16.21	AF16	23	1/30/15	9	34.58525306	293	271.303333	0.12463129	0.12294736	0.094563618	0
wormd20150130s4HAAF16rt23w06r10	5	AF16.21	AF16	23	1/30/15	10	35.64647755	293	293.58	0.1196637	0.11938661	0.094563618	0
wormd20150130s4HAAF16rt23w06r11	5	AF16.21	AF16	23	1/30/15	11	36.70770204	293	319.533333	0.1122592	0.11186862	0.094563618	0
wormd20150130s4HAAF16rt23w06r12	5	AF16.21	AF16	23	1/30/15	12	37.76892653	293	347.713333	0.1022178	0.10156266	0.094563618	0
wormd20150130s4HAAF16rt23w06r13	5	AF16.21	AF16	23	1/30/15	13	38.83015102	293	365.816667	0.10091265	0.10161766	0.094563618	0
wormd20150130s4HAAF16rt23w06r14	5	AF16.21	AF16	23	1/30/15	14	39.89137551	293	378.86	0.09974529	0.09922773	0.094563618	0
wormd20150130s4HAAF16rt23w06r15	5	AF16.21	AF16	23	1/30/15	15	40.9526	293	394.96	0.09471915	0.09456362	0.094563618	0
wormd20150130s4HAAF16rt23w10r00	9	AF16.22	AF16	23	1/30/15	0	25.03423265	264	342.586716	0.57811076	0.70442977	0.090435005	1
wormd20150130s4HAAF16rt23w10r01	9	AF16.22	AF16	23	1/30/15	1	26.09545714	204	365.824645	0.50475545	0.64747993	0.090435005	1
wormd20150130s4HAAF16rt23w10r03	9	AF16.22	AF16	23	1/30/15	3	28.21790612	106	343.422018	0.43930412	0.7345301	0.090435005	1
wormd20150130s4HAAF16rt23w10r07	9	AF16.22	AF16	23	1/30/15	7	32.46280408	175	347.141414	0.46957301	0.66270177	0.090435005	1
wormd20150130s4HAAF16rt23w10r08	9	AF16.22	AF16	23	1/30/15	8	33.52402857	124	307.530303	0.32466948	0.71488294	0.090435005	1
wormd20150130s4HAAF16rt23w10r09	9	AF16.22	AF16	23	1/30/15	9	34.58525306	153	289.969697	0.10242373	0.16823984	0.090435005	1
wormd20150130s4HAAF16rt23w10r10	9	AF16.22	AF16	23	1/30/15	10	35.64647755	293	299.643333	0.09268501	0.13466585	0.090435005	0
wormd20150130s4HAAF16rt23w10r11	9	AF16.22	AF16	23	1/30/15	11	36.70770204	293	292.893333	0.09192664	0.13711434	0.090435005	0
wormd20150130s4HAAF16rt23w10r12	9	AF16.22	AF16	23	1/30/15	12	37.76892653	293	330.78	0.08906582	0.090435	0.090435005	0
wormd20150130s4HAAF16rt23w10r13	9	AF16.22	AF16	23	1/30/15	13	38.83015102	293	313.766667	0.09879703	0.09747935	0.090435005	0
wormd20150130s4HAAF16rt23w10r14	9	AF16.22	AF16	23	1/30/15	14	39.89137551	293	276.923333	0.09959251	0.09828893	0.090435005	0
wormd20150130s4HAAF16rt23w10r15	9	AF16.22	AF16	23	1/30/15	15	40.9526	293	308.573333	0.09337025	0.09237998	0.090435005	0
wormd20150130s4HAAF16rt23w11r00	10	AF16.23	AF16	23	1/30/15	0	25.03423265	292	411.434783	0.4866054	0.67158958	0.055514377	1
wormd20150130s4HAAF16rt23w11r02	10	AF16.23	AF16	23	1/30/15	2	27.15668163	293	421.946667	0.46717154	0.66023342	0.055514377	1
wormd20150130s4HAAF16rt23w11r03	10	AF16.23	AF16	23	1/30/15	3	28.21790612	198	346.59204	0.38353526	0.47866096	0.055514377	1
wormd20150130s4HAAF16rt23w11r04	10	AF16.23	AF16	23	1/30/15	4	29.27913061	222	107.349345	0.05714212	0.05551438	0.055514377	0
wormd20150130s4HAAF16rt23w11r07	10	AF16.23	AF16	23	1/30/15	7	32.46280408	221	395.933054	0.37398129	0.56997151	0.055514377	1
wormd20150130s4HAAF16rt23w11r08	10	AF16.23	AF16	23	1/30/15	8	33.52402857	109	358.044248	0.24080891	0.62728574	0.055514377	1
wormd20150130s4HAAF16rt23w11r09	10	AF16.23	AF16	23	1/30/15	9	34.58525306	146	386.467066	0.14845008	0.47822154	0.055514377	1
wormd20150130s4HAAF16rt23w11r10	10	AF16.23	AF16	23	1/30/15	10	35.64647755	293	381.726667	0.09001111	0.11425733	0.055514377	0
wormd20150130s4HAAF16rt23w11r11	10	AF16.23	AF16	23	1/30/15	11	36.70770204	293	375.3	0.09509842	0.15647352	0.055514377	1
wormd20150130s4HAAF16rt23w11r12	10	AF16.23	AF16	23	1/30/15	12	37.76892653	293	399.6	0.09421185	0.09254966	0.055514377	0
wormd20150130s4HAAF16rt23w11r13	10	AF16.23	AF16	23	1/30/15	13	38.83015102	293	398.943333	0.09216038	0.09204868	0.055514377	0
wormd20150130s4HAAF16rt23w11r14	10	AF16.23	AF16	23	1/30/15	14	39.89137551	293	398.9	0.09142686	0.09202128	0.055514377	0
wormd20150130s4HAAF16rt23w11r15	10	AF16.23	AF16	23	1/30/15	15	40.9526	293	409.56	0.07902999	0.07956668	0.055514377	0
wormd20150130s4HAAF16rt23w12r00	11	AF16.24	AF16	23	1/30/15	0	25.03423265	292	439.494983	0.43875617	0.58558226	0.138134137	1
wormd20150130s4HAAF16rt23w12r01	11	AF16.24	AF16	23	1/30/15	1	26.09545714	265	452.375	0.45935569	0.64234138	0.138134137	1
wormd20150130s4HAAF16rt23w12r02	11	AF16.24	AF16	23	1/30/15	2	27.15668163	134	446	0.40051045	0.60401704	0.138134137	1
wormd20150130s4HAAF16rt23w12r05	11	AF16.24	AF16	23	1/30/15	5	30.3403551	202	430.823529	0.57875956	0.71757413	0.138134137	1
wormd20150130s4HAAF16rt23w12r06	11	AF16.24	AF16	23	1/30/15	6	31.40157959	144	414.243243	0.42630048	0.56769825	0.138134137	1
wormd20150130s4HAAF16rt23w12r09	11	AF16.24	AF16	23	1/30/15	9	34.58525306	108	278.380531	0.11735469	0.21132987	0.138134137	1
wormd20150130s4HAAF16rt23w12r11	11	AF16.24	AF16	23	1/30/15	11	36.70770204	293	376.45	0.13665453	0.1468603	0.138134137	1
wormd20150130s4HAAF16rt23w12r12	11	AF16.24	AF16	23	1/30/15	12	37.76892653	255	369.209738	0.13724601	0.13813414	0.138134137	0
wormd20150130s4HAAF16rt23w16r00	15	AF16.25	AF16	23	1/30/15	0	25.03423265	293	437.953333	0.4436484	0.51826319	0.124014141	1
wormd20150130s4HAAF16rt23w16r01	15	AF16.25	AF16	23	1/30/15	1	26.09545714	211	415.16055	0.49130489	0.57567429	0.124014141	1
wormd20150130s4HAAF16rt23w16r04	15	AF16.25	AF16	23	1/30/15	4	29.27913061	250	408.116732	0.48238019	0.66746873	0.124014141	1
wormd20150130s4HAAF16rt23w16r05	15	AF16.25	AF16	23	1/30/15	5	30.3403551	266	412.238095	0.48608777	0.65151284	0.124014141	1
wormd20150130s4HAAF16rt23w16r06	15	AF16.25	AF16	23	1/30/15	6	31.40157959	289	406.101695	0.32628023	0.6434419	0.124014141	1
wormd20150130s4HAAF16rt23w16r07	15	AF16.25	AF16	23	1/30/15	7	32.46280408	137	530.151515	0.28212418	0.58883756	0.124014141	1
wormd20150130s4HAAF16rt23w16r08	15	AF16.25	AF16	23	1/30/15	8	33.52402857	275	314.953901	0.14933325	0.15388479	0.124014141	1
wormd20150130s4HAAF16rt23w16r09	15	AF16.25	AF16	23	1/30/15	9	34.58525306	290	307.848485	0.11882814	0.15211051	0.124014141	1
wormd20150130s4HAAF16rt23w16r10	15	AF16.25	AF16	23	1/30/15	10	35.64647755	293	348.43	0.1207819	0.1926865	0.124014141	1
wormd20150130s4HAAF16rt23w16r11	15	AF16.25	AF16	23	1/30/15	11	36.70770204	164	351.900552	0.11906802	0.31255861	0.124014141	1
wormd20150130s4HAAF16rt23w16r12	15	AF16.25	AF16	23	1/30/15	12	37.76892653	293	347.243333	0.12577955	0.12401414	0.124014141	0
wormd20150130s4HAAF16rt23w17r00	16	AF16.26	AF16	23	1/30/15	0	25.03423265	292	418.658863	0.4695697	0.61003672	0.109062179	1
wormd20150130s4HAAF16rt23w17r01	16	AF16.26	AF16	23	1/30/15	1	26.09545714	290	419.622896	0.47992419	0.6724668	0.109062179	1
wormd20150130s4HAAF16rt23w17r02	16	AF16.26	AF16	23	1/30/15	2	27.15668163	207	410.820755	0.52755024	0.67743151	0.109062179	1
wormd20150130s4HAAF16rt23w17r03	16	AF16.26	AF16	23	1/30/15	3	28.21790612	156	375.21519	0.40560104	0.68608766	0.109062179	1
wormd20150130s4HAAF16rt23w17r04	16	AF16.26	AF16	23	1/30/15	4	29.27913061	191	438.393939	0.4961581	0.64936111	0.109062179	1
wormd20150130s4HAAF16rt23w17r06	16	AF16.26	AF16	23	1/30/15	6	31.40157959	144	428.234483	0.32893987	0.50011309	0.109062179	1
wormd20150130s4HAAF16rt23w17r07	16	AF16.26	AF16	23	1/30/15	7	32.46280408	230	405.649789	0.32661432	0.68265104	0.109062179	1
wormd20150130s4HAAF16rt23w17r08	16	AF16.26	AF16	23	1/30/15	8	33.52402857	293	380.503333	0.26351039	0.607294	0.109062179	1
wormd20150130s4HAAF16rt23w17r10	16	AF16.26	AF16	23	1/30/15	10	35.64647755	116	307.728814	0.14154682	0.40972705	0.109062179	1
wormd20150130s4HAAF16rt23w17r11	16	AF16.26	AF16	23	1/30/15	11	36.70770204	174	304.368715	0.11558484	0.13235252	0.109062179	0
wormd20150130s4HAAF16rt23w17r12	16	AF16.26	AF16	23	1/30/15	12	37.76892653	277	318.588028	0.11330638	0.11229233	0.109062179	0
wormd20150130s4HAAF16rt23w17r13	16	AF16.26	AF16	23	1/30/15	13	38.83015102	293	307.126667	0.11984427	0.11872223	0.109062179	0
wormd20150130s4HAAF16rt23w17r14	16	AF16.26	AF16	23	1/30/15	14	39.89137551	174	298.586592	0.12008262	0.14807845	0.109062179	1
wormd20150130s4HAAF16rt23w17r15	16	AF16.26	AF16	23	1/30/15	15	40.9526	201	332.365385	0.11155262	0.10906218	0.109062179	0
wormd20150130s4HAAF16rt23w18r00	17	AF16.27	AF16	23	1/30/15	0	25.03423265	265	332.279412	0.50731472	0.60802865	0.099880926	1
wormd20150130s4HAAF16rt23w18r01	17	AF16.27	AF16	23	1/30/15	1	26.09545714	183	247.568421	0.28215836	0.35366396	0.099880926	1
wormd20150130s4HAAF16rt23w18r02	17	AF16.27	AF16	23	1/30/15	2	27.15668163	219	322.376106	0.41996491	0.59058306	0.099880926	1
wormd20150130s4HAAF16rt23w18r03	17	AF16.27	AF16	23	1/30/15	3	28.21790612	233	369.770833	0.55797399	0.69600955	0.099880926	1
wormd20150130s4HAAF16rt23w18r04	17	AF16.27	AF16	23	1/30/15	4	29.27913061	156	334.757764	0.56586893	0.69194066	0.099880926	1
wormd20150130s4HAAF16rt23w18r05	17	AF16.27	AF16	23	1/30/15	5	30.3403551	273	366.992857	0.55445921	0.66497584	0.099880926	1
wormd20150130s4HAAF16rt23w18r06	17	AF16.27	AF16	23	1/30/15	6	31.40157959	118	223.672131	0.21457308	0.25621563	0.099880926	1
wormd20150130s4HAAF16rt23w18r07	17	AF16.27	AF16	23	1/30/15	7	32.46280408	264	404.179104	0.45509121	0.56546476	0.099880926	1
wormd20150130s4HAAF16rt23w18r08	17	AF16.27	AF16	23	1/30/15	8	33.52402857	286	342.354949	0.41178371	0.57337508	0.099880926	1
wormd20150130s4HAAF16rt23w18r09	17	AF16.27	AF16	23	1/30/15	9	34.58525306	293	253.75	0.10869482	0.12971236	0.099880926	0
wormd20150130s4HAAF16rt23w18r10	17	AF16.27	AF16	23	1/30/15	10	35.64647755	293	260.876667	0.11184172	0.21547513	0.099880926	1
wormd20150130s4HAAF16rt23w18r11	17	AF16.27	AF16	23	1/30/15	11	36.70770204	293	239.226667	0.10248764	0.10357727	0.099880926	0
wormd20150130s4HAAF16rt23w18r12	17	AF16.27	AF16	23	1/30/15	12	37.76892653	106	383.364486	0.14486879	0.22039315	0.099880926	1
wormd20150130s4HAAF16rt23w18r14	17	AF16.27	AF16	23	1/30/15	14	39.89137551	290	299.804714	0.11551108	0.1285196	0.099880926	0
wormd20150130s4HAAF16rt23w18r15	17	AF16.27	AF16	23	1/30/15	15	40.9526	252	297.783784	0.09519814	0.09988093	0.099880926	0
wormd20150130s7HK104AF16rt23w04r00	3	AF16.28	AF16	23	1/30/15	0	25.03423265	293	346.376667	0.43767039	0.67237505	0.090730391	1
wormd20150130s7HK104AF16rt23w04r01	3	AF16.28	AF16	23	1/30/15	1	26.09545714	124	306.359375	0.45914867	0.5386038	0.090730391	1
wormd20150130s7HK104AF16rt23w04r04	3	AF16.28	AF16	23	1/30/15	4	29.27913061	118	298	0.373572	0.6456003	0.090730391	1
wormd20150130s7HK104AF16rt23w04r06	3	AF16.28	AF16	23	1/30/15	6	31.40157959	214	355.869955	0.55382385	0.70394115	0.090730391	1
wormd20150130s7HK104AF16rt23w04r07	3	AF16.28	AF16	23	1/30/15	7	32.46280408	107	319.957627	0.64310119	0.77851096	0.090730391	1
wormd20150130s7HK104AF16rt23w04r09	3	AF16.28	AF16	23	1/30/15	9	34.58525306	223	263.671642	0.09689535	0.14727095	0.090730391	1
wormd20150130s7HK104AF16rt23w04r12	3	AF16.28	AF16	23	1/30/15	12	37.76892653	293	274.1	0.08723782	0.09075121	0.090730391	0
wormd20150130s7HK104AF16rt23w04r13	3	AF16.28	AF16	23	1/30/15	13	38.83015102	293	278.843333	0.09121353	0.09073039	0.090730391	0
wormd20150130s7HK104AF16rt23w04r14	3	AF16.28	AF16	23	1/30/15	14	39.89137551	293	273.7	0.10009318	0.10034558	0.090730391	0
wormd20150130s7HK104AF16rt23w04r15	3	AF16.28	AF16	23	1/30/15	15	40.9526	293	275.94	0.09285697	0.09298723	0.090730391	0
wormd20150130s7HK104AF16rt23w05r00	4	AF16.29	AF16	23	1/30/15	0	25.03423265	293	414.816667	0.46790657	0.58153123	0.070421367	1
wormd20150130s7HK104AF16rt23w05r01	4	AF16.29	AF16	23	1/30/15	1	26.09545714	145	279.848684	0.24019852	0.29706006	0.070421367	1
wormd20150130s7HK104AF16rt23w05r04	4	AF16.29	AF16	23	1/30/15	4	29.27913061	232	441.261803	0.40883071	0.62990457	0.070421367	1
wormd20150130s7HK104AF16rt23w05r05	4	AF16.29	AF16	23	1/30/15	5	30.3403551	112	193.378151	0.15097258	0.28337171	0.070421367	1
wormd20150130s7HK104AF16rt23w05r07	4	AF16.29	AF16	23	1/30/15	7	32.46280408	261	416.64794	0.37829214	0.5971075	0.070421367	1
wormd20150130s7HK104AF16rt23w05r09	4	AF16.29	AF16	23	1/30/15	9	34.58525306	150	96.2484076	0.06560942	0.07042137	0.070421367	0
wormd20150130s7HK104AF16rt23w05r10	4	AF16.29	AF16	23	1/30/15	10	35.64647755	241	215.651822	0.07579999	0.08461949	0.070421367	0
wormd20150130s7HK104AF16rt23w05r11	4	AF16.29	AF16	23	1/30/15	11	36.70770204	275	406.865248	0.08244595	0.08303836	0.070421367	0
wormd20150130s7HK104AF16rt23w05r12	4	AF16.29	AF16	23	1/30/15	12	37.76892653	227	345.106838	0.07924415	0.08255102	0.070421367	0
wormd20150130s7HK104AF16rt23w05r13	4	AF16.29	AF16	23	1/30/15	13	38.83015102	211	409.446512	0.09918968	0.10008092	0.070421367	0
wormd20150130s7HK104AF16rt23w05r14	4	AF16.29	AF16	23	1/30/15	14	39.89137551	275	396.914894	0.09112201	0.09033513	0.070421367	0
wormd20150130s7HK104AF16rt23w05r15	4	AF16.29	AF16	23	1/30/15	15	40.9526	266	387.106227	0.09046086	0.08987391	0.070421367	0
wormd20150130s7HK104AF16rt23w06r00	5	AF16.30	AF16	23	1/30/15	0	25.03423265	293	390.08	0.47246234	0.5994655	0.005581751	1
wormd20150130s7HK104AF16rt23w06r01	5	AF16.30	AF16	23	1/30/15	1	26.09545714	265	391.783088	0.5316378	0.70264676	0.005581751	1
wormd20150130s7HK104AF16rt23w06r02	5	AF16.30	AF16	23	1/30/15	2	27.15668163	147	356.065359	0.50435216	0.69666048	0.005581751	1
wormd20150130s7HK104AF16rt23w06r03	5	AF16.30	AF16	23	1/30/15	3	28.21790612	107	375.12037	0.5359275	0.68038323	0.005581751	1
wormd20150130s7HK104AF16rt23w06r08	5	AF16.30	AF16	23	1/30/15	8	33.52402857	288	364.32646	0.15991057	0.48919715	0.005581751	1
wormd20150130s7HK104AF16rt23w06r09	5	AF16.30	AF16	23	1/30/15	9	34.58525306	197	109.930348	0.01577523	0.02150722	0.005581751	0
wormd20150130s7HK104AF16rt23w06r10	5	AF16.30	AF16	23	1/30/15	10	35.64647755	129	87.3897059	0.00717345	0.00738091	0.005581751	0
wormd20150130s7HK104AF16rt23w06r11	5	AF16.30	AF16	23	1/30/15	11	36.70770204	110	227.649573	0.06826395	0.07970897	0.005581751	0
wormd20150130s7HK104AF16rt23w06r12	5	AF16.30	AF16	23	1/30/15	12	37.76892653	254	260.954023	0.09467857	0.09753012	0.005581751	0
wormd20150130s7HK104AF16rt23w06r13	5	AF16.30	AF16	23	1/30/15	13	38.83015102	124	81.9055118	0.00628787	0.00658295	0.005581751	0
wormd20150130s7HK104AF16rt23w06r14	5	AF16.30	AF16	23	1/30/15	14	39.89137551	166	81.8596491	0.00523302	0.00558175	0.005581751	0
wormd20150130s7HK104AF16rt23w06r15	5	AF16.30	AF16	23	1/30/15	15	40.9526	217	81.9	0.00606522	0.00581596	0.005581751	0
wormd20150130s7HK104AF16rt23w10r00	9	AF16.31	AF16	23	1/30/15	0	25.03423265	293	512.433333	0.48130707	0.61782794	0.083427315	1
wormd20150130s7HK104AF16rt23w10r02	9	AF16.31	AF16	23	1/30/15	2	27.15668163	153	570.840426	0.53120639	0.69998098	0.083427315	1
wormd20150130s7HK104AF16rt23w10r03	9	AF16.31	AF16	23	1/30/15	3	28.21790612	106	495.524691	0.43325716	0.71001469	0.083427315	1
wormd20150130s7HK104AF16rt23w10r10	9	AF16.31	AF16	23	1/30/15	10	35.64647755	225	455.440945	0.09726625	0.1128582	0.083427315	0
wormd20150130s7HK104AF16rt23w10r11	9	AF16.31	AF16	23	1/30/15	11	36.70770204	293	432.02	0.08999564	0.12641081	0.083427315	0
wormd20150130s7HK104AF16rt23w10r12	9	AF16.31	AF16	23	1/30/15	12	37.76892653	293	446.853333	0.0907971	0.1162171	0.083427315	0
wormd20150130s7HK104AF16rt23w10r13	9	AF16.31	AF16	23	1/30/15	13	38.83015102	293	455.596667	0.09905437	0.09831015	0.083427315	0
wormd20150130s7HK104AF16rt23w10r14	9	AF16.31	AF16	23	1/30/15	14	39.89137551	158	472.828358	0.08462426	0.08342732	0.083427315	0
wormd20150130s7HK104AF16rt23w11r00	10	AF16.32	AF16	23	1/30/15	0	25.03423265	293	456.203333	0.3635021	0.60437124	0.074414747	1
wormd20150130s7HK104AF16rt23w11r01	10	AF16.32	AF16	23	1/30/15	1	26.09545714	293	461.76	0.44159167	0.67239602	0.074414747	1
wormd20150130s7HK104AF16rt23w11r02	10	AF16.32	AF16	23	1/30/15	2	27.15668163	116	422.569106	0.41861026	0.59219713	0.074414747	1
wormd20150130s7HK104AF16rt23w11r04	10	AF16.32	AF16	23	1/30/15	4	29.27913061	168	439.074286	0.41437611	0.54078197	0.074414747	1
wormd20150130s7HK104AF16rt23w11r07	10	AF16.32	AF16	23	1/30/15	7	32.46280408	120	299.874016	0.330166	0.41754065	0.074414747	1
wormd20150130s7HK104AF16rt23w11r08	10	AF16.32	AF16	23	1/30/15	8	33.52402857	123	313.31746	0.30945881	0.43710925	0.074414747	1
wormd20150130s7HK104AF16rt23w11r10	10	AF16.32	AF16	23	1/30/15	10	35.64647755	290	452.680135	0.10487174	0.14897467	0.074414747	1
wormd20150130s7HK104AF16rt23w11r11	10	AF16.32	AF16	23	1/30/15	11	36.70770204	292	412.498328	0.13222763	0.39611827	0.074414747	1
wormd20150130s7HK104AF16rt23w11r12	10	AF16.32	AF16	23	1/30/15	12	37.76892653	293	436.226667	0.08416871	0.08548208	0.074414747	0
wormd20150130s7HK104AF16rt23w11r13	10	AF16.32	AF16	23	1/30/15	13	38.83015102	292	415.214047	0.09749803	0.10092498	0.074414747	0
wormd20150130s7HK104AF16rt23w11r14	10	AF16.32	AF16	23	1/30/15	14	39.89137551	293	347.626667	0.10921683	0.11217728	0.074414747	0
wormd20150130s7HK104AF16rt23w11r15	10	AF16.32	AF16	23	1/30/15	15	40.9526	293	429.576667	0.07406725	0.07441475	0.074414747	0
wormd20150130s7HK104AF16rt23w12r00	11	AF16.33	AF16	23	1/30/15	0	25.03423265	293	503.166667	0.35308513	0.6413092	0.104587029	1
wormd20150130s7HK104AF16rt23w12r01	11	AF16.33	AF16	23	1/30/15	1	26.09545714	248	466.47451	0.55819074	0.66698677	0.104587029	1
wormd20150130s7HK104AF16rt23w12r02	11	AF16.33	AF16	23	1/30/15	2	27.15668163	268	488.123636	0.490118	0.63887981	0.104587029	1
wormd20150130s7HK104AF16rt23w12r03	11	AF16.33	AF16	23	1/30/15	3	28.21790612	186	520.957219	0.4816007	0.62493689	0.104587029	1
wormd20150130s7HK104AF16rt23w12r05	11	AF16.33	AF16	23	1/30/15	5	30.3403551	190	388.583756	0.5337615	0.73531436	0.104587029	1
wormd20150130s7HK104AF16rt23w12r06	11	AF16.33	AF16	23	1/30/15	6	31.40157959	113	470.058824	0.24000211	0.56266639	0.104587029	1
wormd20150130s7HK104AF16rt23w12r09	11	AF16.33	AF16	23	1/30/15	9	34.58525306	243	424.536	0.39128054	0.66157251	0.104587029	1
wormd20150130s7HK104AF16rt23w12r10	11	AF16.33	AF16	23	1/30/15	10	35.64647755	252	363.718147	0.29757691	0.7629562	0.104587029	1
wormd20150130s7HK104AF16rt23w12r11	11	AF16.33	AF16	23	1/30/15	11	36.70770204	293	327.113333	0.10472949	0.21146565	0.104587029	1
wormd20150130s7HK104AF16rt23w12r12	11	AF16.33	AF16	23	1/30/15	12	37.76892653	293	410.116667	0.12432685	0.19172914	0.104587029	1
wormd20150130s7HK104AF16rt23w12r13	11	AF16.33	AF16	23	1/30/15	13	38.83015102	280	367.355401	0.1240926	0.12432111	0.104587029	0
wormd20150130s7HK104AF16rt23w12r15	11	AF16.33	AF16	23	1/30/15	15	40.9526	140	417.171975	0.09327539	0.10458703	0.104587029	0
wormd20150130s7HK104AF16rt23w16r00	15	AF16.34	AF16	23	1/30/15	0	25.03423265	293	453.92	0.45686416	0.60543298	0.116646155	1
wormd20150130s7HK104AF16rt23w16r01	15	AF16.34	AF16	23	1/30/15	1	26.09545714	234	421.731915	0.51196446	0.67366409	0.116646155	1
wormd20150130s7HK104AF16rt23w16r04	15	AF16.34	AF16	23	1/30/15	4	29.27913061	161	410.672727	0.46989272	0.66104365	0.116646155	1
wormd20150130s7HK104AF16rt23w16r07	15	AF16.34	AF16	23	1/30/15	7	32.46280408	250	134.801556	0.11452844	0.11664615	0.116646155	0
wormd20150130s7HK104AF16rt23w16r08	15	AF16.34	AF16	23	1/30/15	8	33.52402857	233	152.870833	0.11842157	0.12291201	0.116646155	0
wormd20150130s7HK104AF16rt23w16r09	15	AF16.34	AF16	23	1/30/15	9	34.58525306	293	341.953333	0.12487689	0.12814135	0.116646155	0
wormd20150130s7HK104AF16rt23w16r10	15	AF16.34	AF16	23	1/30/15	10	35.64647755	293	312.563333	0.12635875	0.13673684	0.116646155	0
wormd20150130s7HK104AF16rt23w16r11	15	AF16.34	AF16	23	1/30/15	11	36.70770204	293	318.023333	0.12583419	0.16040467	0.116646155	1
wormd20150130s7HK104AF16rt23w16r12	15	AF16.34	AF16	23	1/30/15	12	37.76892653	293	301.906667	0.12566046	0.1258467	0.116646155	0
wormd20150130s7HK104AF16rt23w16r13	15	AF16.34	AF16	23	1/30/15	13	38.83015102	293	299.833333	0.12956764	0.12882102	0.116646155	0
wormd20150130s7HK104AF16rt23w16r14	15	AF16.34	AF16	23	1/30/15	14	39.89137551	293	312.76	0.13213306	0.12919232	0.116646155	0
wormd20150130s7HK104AF16rt23w16r15	15	AF16.34	AF16	23	1/30/15	15	40.9526	293	329.02	0.12707642	0.12705081	0.116646155	0
wormd20150130s7HK104AF16rt23w17r00	16	AF16.35	AF16	23	1/30/15	0	25.03423265	290	449.771044	0.43425945	0.6094865	0.094685567	1
wormd20150130s7HK104AF16rt23w17r01	16	AF16.35	AF16	23	1/30/15	1	26.09545714	216	461.766816	0.47039782	0.64307485	0.094685567	1
wormd20150130s7HK104AF16rt23w17r02	16	AF16.35	AF16	23	1/30/15	2	27.15668163	129	405.154412	0.47631108	0.63132959	0.094685567	1
wormd20150130s7HK104AF16rt23w17r04	16	AF16.35	AF16	23	1/30/15	4	29.27913061	144	338.317568	0.43367351	0.58732408	0.094685567	1
wormd20150130s7HK104AF16rt23w17r05	16	AF16.35	AF16	23	1/30/15	5	30.3403551	112	407.017241	0.3491411	0.55515447	0.094685567	1
wormd20150130s7HK104AF16rt23w17r06	16	AF16.35	AF16	23	1/30/15	6	31.40157959	228	446.144681	0.49416872	0.65501483	0.094685567	1
wormd20150130s7HK104AF16rt23w17r07	16	AF16.35	AF16	23	1/30/15	7	32.46280408	120	477.952756	0.31955635	0.44567067	0.094685567	1
wormd20150130s7HK104AF16rt23w17r08	16	AF16.35	AF16	23	1/30/15	8	33.52402857	139	496.719178	0.23468139	0.34530051	0.094685567	1
wormd20150130s7HK104AF16rt23w17r09	16	AF16.35	AF16	23	1/30/15	9	34.58525306	293	400.88	0.19071847	0.36466779	0.094685567	1
wormd20150130s7HK104AF16rt23w17r10	16	AF16.35	AF16	23	1/30/15	10	35.64647755	293	407.796667	0.1095683	0.16282267	0.094685567	1
wormd20150130s7HK104AF16rt23w17r11	16	AF16.35	AF16	23	1/30/15	11	36.70770204	293	428.163333	0.10259244	0.11785253	0.094685567	0
wormd20150130s7HK104AF16rt23w17r12	16	AF16.35	AF16	23	1/30/15	12	37.76892653	293	435.163333	0.09414913	0.09555691	0.094685567	0
wormd20150130s7HK104AF16rt23w17r13	16	AF16.35	AF16	23	1/30/15	13	38.83015102	293	425.493333	0.09347291	0.09468557	0.094685567	0
wormd20150130s7HK104AF16rt23w17r14	16	AF16.35	AF16	23	1/30/15	14	39.89137551	293	376.316667	0.10945976	0.10884813	0.094685567	0
wormd20150130s7HK104AF16rt23w17r15	16	AF16.35	AF16	23	1/30/15	15	40.9526	293	311.586667	0.11660072	0.11593192	0.094685567	0
wormd20150130s7HK104AF16rt23w18r00	17	AF16.36	AF16	23	1/30/15	0	25.03423265	292	469.307692	0.37958946	0.64617046	0.130682333	1
wormd20150130s7HK104AF16rt23w18r01	17	AF16.36	AF16	23	1/30/15	1	26.09545714	222	258.720524	0.28012902	0.35577281	0.130682333	1
wormd20150130s7HK104AF16rt23w18r02	17	AF16.36	AF16	23	1/30/15	2	27.15668163	129	289.426471	0.37271289	0.49492128	0.130682333	1
wormd20150130s7HK104AF16rt23w18r03	17	AF16.36	AF16	23	1/30/15	3	28.21790612	199	369.019608	0.42117976	0.57002843	0.130682333	1
wormd20150130s7HK104AF16rt23w18r04	17	AF16.36	AF16	23	1/30/15	4	29.27913061	210	86.9677419	0.10406943	0.13068233	0.130682333	0
wormd20150130s7HK104AF16rt23w18r05	17	AF16.36	AF16	23	1/30/15	5	30.3403551	247	240.482213	0.30291334	0.36862917	0.130682333	1
wormd20150130s7HK104AF16rt23w18r06	17	AF16.36	AF16	23	1/30/15	6	31.40157959	139	170.205479	0.29680982	0.36054437	0.130682333	1
wormd20150130s7HK104AF16rt23w18r07	17	AF16.36	AF16	23	1/30/15	7	32.46280408	186	199.502591	0.16982173	0.22367241	0.130682333	1
wormd20150130s7HK104AF16rt23w18r10	17	AF16.36	AF16	23	1/30/15	10	35.64647755	215	95.1972477	0.17014877	0.17249692	0.130682333	1
wormd20150130s7HK104AF16rt23w18r11	17	AF16.36	AF16	23	1/30/15	11	36.70770204	259	109.675472	0.17775939	0.17887603	0.130682333	1
wormd20150130s7HK104AF16rt23w18r12	17	AF16.36	AF16	23	1/30/15	12	37.76892653	292	126.173913	0.16443252	0.16582838	0.130682333	1
wormd20150130s7HK104AF16rt23w18r13	17	AF16.36	AF16	23	1/30/15	13	38.83015102	293	140.073333	0.15229612	0.15364068	0.130682333	1
wormd20150130s7HK104AF16rt23w18r14	17	AF16.36	AF16	23	1/30/15	14	39.89137551	293	151.856667	0.15727702	0.15469404	0.130682333	1
wormd20150130s7HK104AF16rt23w18r15	17	AF16.36	AF16	23	1/30/15	15	40.9526	293	165.923333	0.14959402	0.15267445	0.130682333	1
wormd20150131s12HK104AF16rt23w04r00	3	AF16.1	AF16	23	1/31/15	0	25.03423265	266	403.428571	0.51360016	0.52924829	0.529248294	1
wormd20150131s12HK104AF16rt23w05r00	4	AF16.2	AF16	23	1/31/15	0	25.03423265	293	387.983333	0.46991066	0.58556237	0.092997526	1
wormd20150131s12HK104AF16rt23w05r01	4	AF16.2	AF16	23	1/31/15	1	26.09545714	292	355.113712	0.48617987	0.64075079	0.092997526	1
wormd20150131s12HK104AF16rt23w05r04	4	AF16.2	AF16	23	1/31/15	4	29.27913061	102	363.564815	0.49526903	0.6429704	0.092997526	1
wormd20150131s12HK104AF16rt23w05r05	4	AF16.2	AF16	23	1/31/15	5	30.3403551	143	402.52349	0.47112914	0.57926974	0.092997526	1
wormd20150131s12HK104AF16rt23w05r06	4	AF16.2	AF16	23	1/31/15	6	31.40157959	111	310.9	0.53122485	0.66918643	0.092997526	1
wormd20150131s12HK104AF16rt23w05r08	4	AF16.2	AF16	23	1/31/15	8	33.52402857	122	305.685484	0.41310388	0.64497648	0.092997526	1
wormd20150131s12HK104AF16rt23w05r09	4	AF16.2	AF16	23	1/31/15	9	34.58525306	108	323.6875	0.26090986	0.56311473	0.092997526	1
wormd20150131s12HK104AF16rt23w05r11	4	AF16.2	AF16	23	1/31/15	11	36.70770204	273	311.142857	0.12891744	0.13933902	0.092997526	0
wormd20150131s12HK104AF16rt23w05r12	4	AF16.2	AF16	23	1/31/15	12	37.76892653	201	385.145455	0.08896443	0.10297572	0.092997526	0
wormd20150131s12HK104AF16rt23w05r13	4	AF16.2	AF16	23	1/31/15	13	38.83015102	293	302.73	0.0921233	0.09299753	0.092997526	0
wormd20150131s12HK104AF16rt23w05r14	4	AF16.2	AF16	23	1/31/15	14	39.89137551	218	308.90625	0.09579412	0.09798727	0.092997526	0
wormd20150131s12HK104AF16rt23w06r00	5	AF16.3	AF16	23	1/31/15	0	25.03423265	293	437.066667	0.35132742	0.5519893	0.070343794	1
wormd20150131s12HK104AF16rt23w06r01	5	AF16.3	AF16	23	1/31/15	1	26.09545714	293	473.34	0.36709461	0.57196929	0.070343794	1
wormd20150131s12HK104AF16rt23w06r08	5	AF16.3	AF16	23	1/31/15	8	33.52402857	263	447.218638	0.24997277	0.60870686	0.070343794	1
wormd20150131s12HK104AF16rt23w06r10	5	AF16.3	AF16	23	1/31/15	10	35.64647755	158	401.177778	0.0834816	0.10429439	0.070343794	0
wormd20150131s12HK104AF16rt23w06r11	5	AF16.3	AF16	23	1/31/15	11	36.70770204	293	429.01	0.07315445	0.08444308	0.070343794	0
wormd20150131s12HK104AF16rt23w06r12	5	AF16.3	AF16	23	1/31/15	12	37.76892653	293	442.793333	0.0664605	0.07034379	0.070343794	0
wormd20150131s12HK104AF16rt23w06r13	5	AF16.3	AF16	23	1/31/15	13	38.83015102	293	425.1	0.07126196	0.07143307	0.070343794	0
wormd20150131s12HK104AF16rt23w06r14	5	AF16.3	AF16	23	1/31/15	14	39.89137551	293	429.52	0.07544568	0.07573951	0.070343794	0
wormd20150131s12HK104AF16rt23w06r15	5	AF16.3	AF16	23	1/31/15	15	40.9526	293	420.226667	0.07630163	0.0764454	0.070343794	0
wormd20150131s12HK104AF16rt23w10r00	9	AF16.4	AF16	23	1/31/15	0	25.03423265	293	557.78	0.31280936	0.49834225	0.097125343	1
wormd20150131s12HK104AF16rt23w10r01	9	AF16.4	AF16	23	1/31/15	1	26.09545714	146	506.751634	0.34747311	0.45552148	0.097125343	1
wormd20150131s12HK104AF16rt23w10r11	9	AF16.4	AF16	23	1/31/15	11	36.70770204	164	489.833333	0.1189493	0.25359452	0.097125343	1
wormd20150131s12HK104AF16rt23w10r13	9	AF16.4	AF16	23	1/31/15	13	38.83015102	293	516.9	0.09732599	0.09712534	0.097125343	0
wormd20150131s12HK104AF16rt23w11r00	10	AF16.5	AF16	23	1/31/15	0	25.03423265	293	526.833333	0.34600235	0.5280271	0.099187908	1
wormd20150131s12HK104AF16rt23w11r10	10	AF16.5	AF16	23	1/31/15	10	35.64647755	226	467.398438	0.16829845	0.42240713	0.099187908	1
wormd20150131s12HK104AF16rt23w11r11	10	AF16.5	AF16	23	1/31/15	11	36.70770204	293	575.97	0.09121463	0.09959993	0.099187908	0
wormd20150131s12HK104AF16rt23w11r12	10	AF16.5	AF16	23	1/31/15	12	37.76892653	293	542.226667	0.0938106	0.11820851	0.099187908	0
wormd20150131s12HK104AF16rt23w11r13	10	AF16.5	AF16	23	1/31/15	13	38.83015102	293	514.393333	0.09968758	0.10015947	0.099187908	0
wormd20150131s12HK104AF16rt23w11r14	10	AF16.5	AF16	23	1/31/15	14	39.89137551	293	509.02	0.09912371	0.09918791	0.099187908	0
wormd20150131s12HK104AF16rt23w12r00	11	AF16.6	AF16	23	1/31/15	0	25.03423265	255	366.480916	0.45250005	0.50690021	0.118659483	1
wormd20150131s12HK104AF16rt23w12r01	11	AF16.6	AF16	23	1/31/15	1	26.09545714	212	392.792627	0.45304497	0.59536624	0.118659483	1
wormd20150131s12HK104AF16rt23w12r02	11	AF16.6	AF16	23	1/31/15	2	27.15668163	246	357.976096	0.57581574	0.6411906	0.118659483	1
wormd20150131s12HK104AF16rt23w12r03	11	AF16.6	AF16	23	1/31/15	3	28.21790612	279	313.115385	0.65620436	0.78909708	0.118659483	1
wormd20150131s12HK104AF16rt23w12r04	11	AF16.6	AF16	23	1/31/15	4	29.27913061	223	304.386667	0.6364754	0.75862529	0.118659483	1
wormd20150131s12HK104AF16rt23w12r05	11	AF16.6	AF16	23	1/31/15	5	30.3403551	209	311.009524	0.57577874	0.69623602	0.118659483	1
wormd20150131s12HK104AF16rt23w12r06	11	AF16.6	AF16	23	1/31/15	6	31.40157959	102	338.037736	0.22649648	0.34515305	0.118659483	1
wormd20150131s12HK104AF16rt23w12r07	11	AF16.6	AF16	23	1/31/15	7	32.46280408	287	340.115646	0.41344917	0.60297185	0.118659483	1
wormd20150131s12HK104AF16rt23w12r08	11	AF16.6	AF16	23	1/31/15	8	33.52402857	128	390.298507	0.28195291	0.56549777	0.118659483	1
wormd20150131s12HK104AF16rt23w12r09	11	AF16.6	AF16	23	1/31/15	9	34.58525306	292	334.381271	0.34831434	0.69008941	0.118659483	1
wormd20150131s12HK104AF16rt23w12r10	11	AF16.6	AF16	23	1/31/15	10	35.64647755	293	287.453333	0.26964306	0.66839045	0.118659483	1
wormd20150131s12HK104AF16rt23w12r11	11	AF16.6	AF16	23	1/31/15	11	36.70770204	293	413.903333	0.15480604	0.19447078	0.118659483	1
wormd20150131s12HK104AF16rt23w12r12	11	AF16.6	AF16	23	1/31/15	12	37.76892653	293	404.826667	0.14608545	0.23357008	0.118659483	1
wormd20150131s12HK104AF16rt23w12r13	11	AF16.6	AF16	23	1/31/15	13	38.83015102	293	406.966667	0.11804289	0.11865948	0.118659483	0
wormd20150131s12HK104AF16rt23w12r14	11	AF16.6	AF16	23	1/31/15	14	39.89137551	284	446.560137	0.14660928	0.14502484	0.118659483	1
wormd20150131s12HK104AF16rt23w12r15	11	AF16.6	AF16	23	1/31/15	15	40.9526	271	517.989209	0.15793056	0.15730439	0.118659483	1
wormd20150131s12HK104AF16rt23w15r00	15	AF16.7	AF16	23	1/31/15	0	25.03423265	180	120.064171	0.27236023	0.29583421	0.118052263	1
wormd20150131s12HK104AF16rt23w15r01	15	AF16.7	AF16	23	1/31/15	1	26.09545714	201	144.36715	0.19992013	0.20642308	0.118052263	1
wormd20150131s12HK104AF16rt23w15r13	15	AF16.7	AF16	23	1/31/15	13	38.83015102	293	413.106667	0.12742514	0.12767951	0.118052263	0
wormd20150131s12HK104AF16rt23w15r14	15	AF16.7	AF16	23	1/31/15	14	39.89137551	293	447.18	0.12185243	0.12097639	0.118052263	0
wormd20150131s12HK104AF16rt23w15r15	15	AF16.7	AF16	23	1/31/15	15	40.9526	293	457.196667	0.11902456	0.11805226	0.118052263	0
wormd20150131s12HK104AF16rt23w16r00	16	AF16.8	AF16	23	1/31/15	0	25.03423265	292	483.545151	0.48925225	0.57633969	0.147226126	1
wormd20150131s12HK104AF16rt23w16r10	16	AF16.8	AF16	23	1/31/15	10	35.64647755	163	500.263158	0.192736	0.45480869	0.147226126	1
wormd20150131s12HK104AF16rt23w16r11	16	AF16.8	AF16	23	1/31/15	11	36.70770204	293	459.086667	0.08916335	0.14722613	0.147226126	1
wormd20150131s12HK104AF16rt23w16r12	16	AF16.8	AF16	23	1/31/15	12	37.76892653	174	442.919431	0.09688589	0.2197653	0.147226126	1
wormd20150131s12HK104AF16rt23w17r00	17	AF16.9	AF16	23	1/31/15	0	25.03423265	284	409.584192	0.48255177	0.56737614	0.073646808	1
wormd20150131s12HK104AF16rt23w17r01	17	AF16.9	AF16	23	1/31/15	1	26.09545714	155	350.761006	0.51978351	0.60689902	0.073646808	1
wormd20150131s12HK104AF16rt23w17r02	17	AF16.9	AF16	23	1/31/15	2	27.15668163	130	369.021898	0.56611294	0.6739792	0.073646808	1
wormd20150131s12HK104AF16rt23w17r05	17	AF16.9	AF16	23	1/31/15	5	30.3403551	100	421.156863	0.49659396	0.56830573	0.073646808	1
wormd20150131s12HK104AF16rt23w17r11	17	AF16.9	AF16	23	1/31/15	11	36.70770204	267	361.174721	0.11083089	0.22039151	0.073646808	1
wormd20150131s12HK104AF16rt23w17r13	17	AF16.9	AF16	23	1/31/15	13	38.83015102	186	416.592593	0.07423907	0.07364681	0.073646808	0
wormd20150131s12HK104AF16rt23w17r14	17	AF16.9	AF16	23	1/31/15	14	39.89137551	278	431.347368	0.07310913	0.07446506	0.073646808	0
wormd20150131s12HK104AF16rt23w17r15	17	AF16.9	AF16	23	1/31/15	15	40.9526	293	402.396667	0.08095466	0.08191122	0.073646808	0
wormd20150131s1AF16AHcrt23w01r00	0	AF16.10	AF16	23	1/31/15	0	25.03423265	156	146.766871	0.19710407	0.20850055	0.045257189	1
wormd20150131s1AF16AHcrt23w01r02	0	AF16.10	AF16	23	1/31/15	2	27.15668163	164	90.1538462	0.14129552	0.14970896	0.045257189	1
wormd20150131s1AF16AHcrt23w01r03	0	AF16.10	AF16	23	1/31/15	3	28.21790612	237	99.0901639	0.13371428	0.14338453	0.045257189	1
wormd20150131s1AF16AHcrt23w01r04	0	AF16.10	AF16	23	1/31/15	4	29.27913061	216	110.324324	0.1178051	0.11732618	0.045257189	0
wormd20150131s1AF16AHcrt23w01r05	0	AF16.10	AF16	23	1/31/15	5	30.3403551	291	334.993289	0.52179294	0.76919508	0.045257189	1
wormd20150131s1AF16AHcrt23w01r06	0	AF16.10	AF16	23	1/31/15	6	31.40157959	211	127.146789	0.0429494	0.04525719	0.045257189	0
wormd20150131s1AF16AHcrt23w01r14	0	AF16.10	AF16	23	1/31/15	14	39.89137551	236	309.946058	0.09308478	0.0908118	0.045257189	0
wormd20150131s1AF16AHcrt23w01r15	0	AF16.10	AF16	23	1/31/15	15	40.9526	290	308.387205	0.09193028	0.09055819	0.045257189	0
wormd20150131s1AF16AHcrt23w02r00	1	AF16.11	AF16	23	1/31/15	0	25.03423265	216	320.153153	0.55902709	0.61663238	0.059674889	1
wormd20150131s1AF16AHcrt23w02r01	1	AF16.11	AF16	23	1/31/15	1	26.09545714	196	148.522167	0.22384957	0.22601765	0.059674889	1
wormd20150131s1AF16AHcrt23w02r02	1	AF16.11	AF16	23	1/31/15	2	27.15668163	238	281.820833	0.63433242	0.75788265	0.059674889	1
wormd20150131s1AF16AHcrt23w02r04	1	AF16.11	AF16	23	1/31/15	4	29.27913061	106	326.990909	0.39772422	0.48812429	0.059674889	1
wormd20150131s1AF16AHcrt23w02r05	1	AF16.11	AF16	23	1/31/15	5	30.3403551	179	367.802198	0.49721341	0.70858394	0.059674889	1
wormd20150131s1AF16AHcrt23w02r06	1	AF16.11	AF16	23	1/31/15	6	31.40157959	130	347.894737	0.52151767	0.68070131	0.059674889	1
wormd20150131s1AF16AHcrt23w02r07	1	AF16.11	AF16	23	1/31/15	7	32.46280408	146	357.54902	0.42698143	0.70792914	0.059674889	1
wormd20150131s1AF16AHcrt23w02r08	1	AF16.11	AF16	23	1/31/15	8	33.52402857	293	428.05	0.05698474	0.08146177	0.059674889	0
wormd20150131s1AF16AHcrt23w02r09	1	AF16.11	AF16	23	1/31/15	9	34.58525306	293	423.746667	0.06975927	0.14362339	0.059674889	1
wormd20150131s1AF16AHcrt23w02r10	1	AF16.11	AF16	23	1/31/15	10	35.64647755	293	407.866667	0.05803988	0.05967489	0.059674889	0
wormd20150131s1AF16AHcrt23w02r11	1	AF16.11	AF16	23	1/31/15	11	36.70770204	293	383.296667	0.06832081	0.11437859	0.059674889	0
wormd20150131s1AF16AHcrt23w02r12	1	AF16.11	AF16	23	1/31/15	12	37.76892653	293	320.246667	0.06080884	0.0624872	0.059674889	0
wormd20150131s1AF16AHcrt23w02r13	1	AF16.11	AF16	23	1/31/15	13	38.83015102	293	312.893333	0.07029585	0.07208196	0.059674889	0
wormd20150131s1AF16AHcrt23w02r14	1	AF16.11	AF16	23	1/31/15	14	39.89137551	293	308.943333	0.07481229	0.07074701	0.059674889	0
wormd20150131s1AF16AHcrt23w02r15	1	AF16.11	AF16	23	1/31/15	15	40.9526	293	317.15	0.07515389	0.07485393	0.059674889	0
wormd20150131s1AF16AHcrt23w03r00	2	AF16.12	AF16	23	1/31/15	0	25.03423265	232	324.834746	0.58537607	0.70620935	0.066495009	1
wormd20150131s1AF16AHcrt23w03r01	2	AF16.12	AF16	23	1/31/15	1	26.09545714	282	77.2249135	0.14260306	0.14499183	0.066495009	1
wormd20150131s1AF16AHcrt23w03r02	2	AF16.12	AF16	23	1/31/15	2	27.15668163	205	376.245283	0.66708651	0.80719386	0.066495009	1
wormd20150131s1AF16AHcrt23w03r03	2	AF16.12	AF16	23	1/31/15	3	28.21790612	103	375.672897	0.5428854	0.70413917	0.066495009	1
wormd20150131s1AF16AHcrt23w03r04	2	AF16.12	AF16	23	1/31/15	4	29.27913061	125	370.643939	0.57115436	0.72437799	0.066495009	1
wormd20150131s1AF16AHcrt23w03r05	2	AF16.12	AF16	23	1/31/15	5	30.3403551	262	381.527473	0.66304602	0.82266407	0.066495009	1
wormd20150131s1AF16AHcrt23w03r06	2	AF16.12	AF16	23	1/31/15	6	31.40157959	262	317.078358	0.65864174	0.78911491	0.066495009	1
wormd20150131s1AF16AHcrt23w03r07	2	AF16.12	AF16	23	1/31/15	7	32.46280408	262	379.037175	0.61213824	0.7706594	0.066495009	1
wormd20150131s1AF16AHcrt23w03r08	2	AF16.12	AF16	23	1/31/15	8	33.52402857	191	370.618421	0.28742715	0.49516236	0.066495009	1
wormd20150131s1AF16AHcrt23w03r11	2	AF16.12	AF16	23	1/31/15	11	36.70770204	244	345.056338	0.07628925	0.19177522	0.066495009	1
wormd20150131s1AF16AHcrt23w03r12	2	AF16.12	AF16	23	1/31/15	12	37.76892653	293	326.543333	0.06547814	0.08165229	0.066495009	0
wormd20150131s1AF16AHcrt23w03r13	2	AF16.12	AF16	23	1/31/15	13	38.83015102	293	348.483333	0.06709534	0.06649501	0.066495009	0
wormd20150131s1AF16AHcrt23w03r14	2	AF16.12	AF16	23	1/31/15	14	39.89137551	272	332.884477	0.07741025	0.07293715	0.066495009	0
wormd20150131s1AF16AHcrt23w03r15	2	AF16.12	AF16	23	1/31/15	15	40.9526	205	322.518182	0.08537004	0.08343215	0.066495009	0
wormd20150131s1AF16AHcrt23w07r00	6	AF16.13	AF16	23	1/31/15	0	25.03423265	276	486.875887	0.5364897	0.67721537	0.072563597	1
wormd20150131s1AF16AHcrt23w07r01	6	AF16.13	AF16	23	1/31/15	1	26.09545714	270	473.353791	0.53011296	0.69199009	0.072563597	1
wormd20150131s1AF16AHcrt23w07r02	6	AF16.13	AF16	23	1/31/15	2	27.15668163	257	544.507576	0.54516284	0.70210656	0.072563597	1
wormd20150131s1AF16AHcrt23w07r03	6	AF16.13	AF16	23	1/31/15	3	28.21790612	202	506.598086	0.53492943	0.71402834	0.072563597	1
wormd20150131s1AF16AHcrt23w07r05	6	AF16.13	AF16	23	1/31/15	5	30.3403551	157	534.282209	0.36892407	0.61151947	0.072563597	1
wormd20150131s1AF16AHcrt23w07r06	6	AF16.13	AF16	23	1/31/15	6	31.40157959	205	532.695238	0.45913336	0.67537344	0.072563597	1
wormd20150131s1AF16AHcrt23w07r07	6	AF16.13	AF16	23	1/31/15	7	32.46280408	147	490.593023	0.45953795	0.69375343	0.072563597	1
wormd20150131s1AF16AHcrt23w07r08	6	AF16.13	AF16	23	1/31/15	8	33.52402857	106	469.718954	0.46292629	0.68854161	0.072563597	1
wormd20150131s1AF16AHcrt23w07r09	6	AF16.13	AF16	23	1/31/15	9	34.58525306	139	497.110599	0.39488539	0.68086784	0.072563597	1
wormd20150131s1AF16AHcrt23w07r10	6	AF16.13	AF16	23	1/31/15	10	35.64647755	276	508.225352	0.19232686	0.50679433	0.072563597	1
wormd20150131s1AF16AHcrt23w07r11	6	AF16.13	AF16	23	1/31/15	11	36.70770204	223	500.792952	0.07749754	0.22530739	0.072563597	1
wormd20150131s1AF16AHcrt23w07r12	6	AF16.13	AF16	23	1/31/15	12	37.76892653	293	449.393333	0.06934341	0.0725636	0.072563597	0
wormd20150131s1AF16AHcrt23w08r00	7	AF16.14	AF16	23	1/31/15	0	25.03423265	290	294.885522	0.60729933	0.71086405	0.092332473	1
wormd20150131s1AF16AHcrt23w08r01	7	AF16.14	AF16	23	1/31/15	1	26.09545714	171	310.758621	0.5772823	0.69100874	0.092332473	1
wormd20150131s1AF16AHcrt23w08r08	7	AF16.14	AF16	23	1/31/15	8	33.52402857	225	310.337079	0.10036604	0.14675456	0.092332473	1
wormd20150131s1AF16AHcrt23w08r09	7	AF16.14	AF16	23	1/31/15	9	34.58525306	293	329.443333	0.09730558	0.14680659	0.092332473	1
wormd20150131s1AF16AHcrt23w08r10	7	AF16.14	AF16	23	1/31/15	10	35.64647755	171	299.066667	0.10066691	0.18556881	0.092332473	1
wormd20150131s1AF16AHcrt23w08r11	7	AF16.14	AF16	23	1/31/15	11	36.70770204	182	326.433862	0.09280062	0.23117397	0.092332473	1
wormd20150131s1AF16AHcrt23w08r12	7	AF16.14	AF16	23	1/31/15	12	37.76892653	293	299.83	0.09330055	0.09233247	0.092332473	0
wormd20150131s1AF16AHcrt23w08r13	7	AF16.14	AF16	23	1/31/15	13	38.83015102	293	286.193333	0.11503573	0.11554518	0.092332473	0
wormd20150131s1AF16AHcrt23w08r14	7	AF16.14	AF16	23	1/31/15	14	39.89137551	293	267.706667	0.1222499	0.12271027	0.092332473	0
wormd20150131s1AF16AHcrt23w09r00	8	AF16.15	AF16	23	1/31/15	0	25.03423265	153	335.639241	0.37510925	0.43249534	0.072591961	1
wormd20150131s1AF16AHcrt23w09r03	8	AF16.15	AF16	23	1/31/15	3	28.21790612	119	398.007937	0.37892815	0.48925794	0.072591961	1
wormd20150131s1AF16AHcrt23w09r05	8	AF16.15	AF16	23	1/31/15	5	30.3403551	105	358.3125	0.31976888	0.49624671	0.072591961	1
wormd20150131s1AF16AHcrt23w09r07	8	AF16.15	AF16	23	1/31/15	7	32.46280408	188	465.617925	0.42964537	0.66543701	0.072591961	1
wormd20150131s1AF16AHcrt23w09r08	8	AF16.15	AF16	23	1/31/15	8	33.52402857	174	477.515267	0.41173229	0.63754668	0.072591961	1
wormd20150131s1AF16AHcrt23w09r10	8	AF16.15	AF16	23	1/31/15	10	35.64647755	293	407.26	0.0833134	0.09700736	0.072591961	0
wormd20150131s1AF16AHcrt23w09r11	8	AF16.15	AF16	23	1/31/15	11	36.70770204	106	458.397959	0.11809944	0.44079121	0.072591961	1
wormd20150131s1AF16AHcrt23w09r14	8	AF16.15	AF16	23	1/31/15	14	39.89137551	293	473.156667	0.07493408	0.07259196	0.072591961	0
wormd20150131s1AF16AHcrt23w09r15	8	AF16.15	AF16	23	1/31/15	15	40.9526	293	411.11	0.09116064	0.09194932	0.072591961	0
wormd20150131s1AF16AHcrt23w13r00	12	AF16.16	AF16	23	1/31/15	0	25.03423265	293	528.85	0.46206882	0.6595578	0.054767906	1
wormd20150131s1AF16AHcrt23w13r01	12	AF16.16	AF16	23	1/31/15	1	26.09545714	193	493.323232	0.4562309	0.50849205	0.054767906	1
wormd20150131s1AF16AHcrt23w13r02	12	AF16.16	AF16	23	1/31/15	2	27.15668163	168	522.174419	0.43704509	0.60578871	0.054767906	1
wormd20150131s1AF16AHcrt23w13r03	12	AF16.16	AF16	23	1/31/15	3	28.21790612	221	575.839286	0.56882419	0.73404701	0.054767906	1
wormd20150131s1AF16AHcrt23w13r04	12	AF16.16	AF16	23	1/31/15	4	29.27913061	231	527.302521	0.53579007	0.70828907	0.054767906	1
wormd20150131s1AF16AHcrt23w13r05	12	AF16.16	AF16	23	1/31/15	5	30.3403551	243	536.296	0.47430982	0.6674627	0.054767906	1
wormd20150131s1AF16AHcrt23w13r09	12	AF16.16	AF16	23	1/31/15	9	34.58525306	199	631.892157	0.06741315	0.08824972	0.054767906	0
wormd20150131s1AF16AHcrt23w13r10	12	AF16.16	AF16	23	1/31/15	10	35.64647755	140	209.409574	0.12209683	0.14118047	0.054767906	1
wormd20150131s1AF16AHcrt23w13r11	12	AF16.16	AF16	23	1/31/15	11	36.70770204	293	661.05	0.06331057	0.06775536	0.054767906	0
wormd20150131s1AF16AHcrt23w13r12	12	AF16.16	AF16	23	1/31/15	12	37.76892653	293	626.586667	0.05458583	0.05476791	0.054767906	0
wormd20150131s1AF16AHcrt23w13r13	12	AF16.16	AF16	23	1/31/15	13	38.83015102	293	466.613333	0.08645676	0.22974422	0.054767906	1
wormd20150131s1AF16AHcrt23w13r14	12	AF16.16	AF16	23	1/31/15	14	39.89137551	293	456.3	0.06455261	0.06440542	0.054767906	0
wormd20150131s1AF16AHcrt23w13r15	12	AF16.16	AF16	23	1/31/15	15	40.9526	293	443.49	0.0681899	0.06812984	0.054767906	0
wormd20150131s1AF16AHcrt23w14r00	13	AF16.17	AF16	23	1/31/15	0	25.03423265	124	346.709924	0.56714692	0.70587558	0.092355032	1
wormd20150131s1AF16AHcrt23w14r02	13	AF16.17	AF16	23	1/31/15	2	27.15668163	133	307.094891	0.47815571	0.58871175	0.092355032	1
wormd20150131s1AF16AHcrt23w14r03	13	AF16.17	AF16	23	1/31/15	3	28.21790612	148	381.546053	0.52228792	0.65619814	0.092355032	1
wormd20150131s1AF16AHcrt23w14r05	13	AF16.17	AF16	23	1/31/15	5	30.3403551	210	407.814815	0.38045671	0.67423192	0.092355032	1
wormd20150131s1AF16AHcrt23w14r08	13	AF16.17	AF16	23	1/31/15	8	33.52402857	111	371.886957	0.31667605	0.59907675	0.092355032	1
wormd20150131s1AF16AHcrt23w14r09	13	AF16.17	AF16	23	1/31/15	9	34.58525306	139	363.520548	0.34889944	0.62138818	0.092355032	1
wormd20150131s1AF16AHcrt23w14r10	13	AF16.17	AF16	23	1/31/15	10	35.64647755	249	333.160156	0.08852459	0.09235503	0.092355032	0
wormd20150131s1AF16AHcrt23w15r00	14	AF16.18	AF16	23	1/31/15	0	25.03423265	286	383.505119	0.57898354	0.7455952	0.083822667	1
wormd20150131s1AF16AHcrt23w15r01	14	AF16.18	AF16	23	1/31/15	1	26.09545714	266	376.282051	0.56328282	0.74408572	0.083822667	1
wormd20150131s1AF16AHcrt23w15r02	14	AF16.18	AF16	23	1/31/15	2	27.15668163	126	410.763359	0.5725951	0.7471204	0.083822667	1
wormd20150131s1AF16AHcrt23w15r04	14	AF16.18	AF16	23	1/31/15	4	29.27913061	166	384.982659	0.57166635	0.73945611	0.083822667	1
wormd20150131s1AF16AHcrt23w15r06	14	AF16.18	AF16	23	1/31/15	6	31.40157959	128	364.469697	0.51070552	0.74400326	0.083822667	1
wormd20150131s1AF16AHcrt23w15r07	14	AF16.18	AF16	23	1/31/15	7	32.46280408	222	380.943231	0.592909	0.76874919	0.083822667	1
wormd20150131s1AF16AHcrt23w15r08	14	AF16.18	AF16	23	1/31/15	8	33.52402857	293	410.46	0.08150959	0.08382267	0.083822667	0
wormd20150131s1AF16AHcrt23w15r09	14	AF16.18	AF16	23	1/31/15	9	34.58525306	293	345.83	0.09416595	0.15084975	0.083822667	1
wormd20150131s1AF16AHcrt23w15r10	14	AF16.18	AF16	23	1/31/15	10	35.64647755	293	306.076667	0.10244203	0.1171363	0.083822667	0
wormd20150131s1AF16AHcrt23w15r11	14	AF16.18	AF16	23	1/31/15	11	36.70770204	293	304.786667	0.09539567	0.09539728	0.083822667	0
wormd20150131s1AF16AHcrt23w15r12	14	AF16.18	AF16	23	1/31/15	12	37.76892653	293	334.356667	0.08896118	0.08851433	0.083822667	0
wormd20150131s1AF16AHcrt23w15r13	14	AF16.18	AF16	23	1/31/15	13	38.83015102	293	338.7	0.08380151	0.08458774	0.083822667	0
wormd20150131s1AF16AHcrt23w15r14	14	AF16.18	AF16	23	1/31/15	14	39.89137551	293	341.816667	0.08902969	0.08811988	0.083822667	0
wormd20150131s1AF16AHcrt23w15r15	14	AF16.18	AF16	23	1/31/15	15	40.9526	293	333.76	0.09129713	0.09055803	0.083822667	0
wormd20150131s2AF16HAcrt23w01r00	0	AF16.19	AF16	23	1/31/15	0	25.03423265	244	356.163347	0.51763702	0.71977377	0.0525146	1
wormd20150131s2AF16HAcrt23w01r01	0	AF16.19	AF16	23	1/31/15	1	26.09545714	192	300.479592	0.63173455	0.67486807	0.0525146	1
wormd20150131s2AF16HAcrt23w01r02	0	AF16.19	AF16	23	1/31/15	2	27.15668163	250	384.867704	0.47589064	0.72862589	0.0525146	1
wormd20150131s2AF16HAcrt23w01r03	0	AF16.19	AF16	23	1/31/15	3	28.21790612	270	372.111913	0.72943281	0.82654883	0.0525146	1
wormd20150131s2AF16HAcrt23w01r04	0	AF16.19	AF16	23	1/31/15	4	29.27913061	182	325.809524	0.53040771	0.72474218	0.0525146	1
wormd20150131s2AF16HAcrt23w01r05	0	AF16.19	AF16	23	1/31/15	5	30.3403551	162	304.421687	0.69081009	0.77237046	0.0525146	1
wormd20150131s2AF16HAcrt23w01r06	0	AF16.19	AF16	23	1/31/15	6	31.40157959	266	372.051661	0.52561945	0.74711769	0.0525146	1
wormd20150131s2AF16HAcrt23w01r07	0	AF16.19	AF16	23	1/31/15	7	32.46280408	248	374.447059	0.36897647	0.65666115	0.0525146	1
wormd20150131s2AF16HAcrt23w01r08	0	AF16.19	AF16	23	1/31/15	8	33.52402857	293	340.773333	0.0947168	0.28767831	0.0525146	1
wormd20150131s2AF16HAcrt23w01r09	0	AF16.19	AF16	23	1/31/15	9	34.58525306	293	334.666667	0.11357814	0.4535727	0.0525146	1
wormd20150131s2AF16HAcrt23w01r10	0	AF16.19	AF16	23	1/31/15	10	35.64647755	253	303.480769	0.08216251	0.26522928	0.0525146	1
wormd20150131s2AF16HAcrt23w01r11	0	AF16.19	AF16	23	1/31/15	11	36.70770204	293	284.58	0.06921398	0.10042883	0.0525146	0
wormd20150131s2AF16HAcrt23w01r12	0	AF16.19	AF16	23	1/31/15	12	37.76892653	293	299.55	0.06390281	0.07103924	0.0525146	0
wormd20150131s2AF16HAcrt23w01r13	0	AF16.19	AF16	23	1/31/15	13	38.83015102	293	354.606667	0.05249455	0.0525146	0.0525146	0
wormd20150131s2AF16HAcrt23w01r14	0	AF16.19	AF16	23	1/31/15	14	39.89137551	293	363.95	0.05324663	0.05476198	0.0525146	0
wormd20150131s2AF16HAcrt23w01r15	0	AF16.19	AF16	23	1/31/15	15	40.9526	293	378.873333	0.05782272	0.05887546	0.0525146	0
wormd20150131s2AF16HAcrt23w02r00	1	AF16.20	AF16	23	1/31/15	0	25.03423265	251	348.242188	0.58815513	0.66188376	0.115150752	1
wormd20150131s2AF16HAcrt23w02r01	1	AF16.20	AF16	23	1/31/15	1	26.09545714	248	382.415686	0.51971888	0.7376917	0.115150752	1
wormd20150131s2AF16HAcrt23w02r02	1	AF16.20	AF16	23	1/31/15	2	27.15668163	251	327.639216	0.66932612	0.77848871	0.115150752	1
wormd20150131s2AF16HAcrt23w02r03	1	AF16.20	AF16	23	1/31/15	3	28.21790612	172	339.331461	0.47285154	0.67300486	0.115150752	1
wormd20150131s2AF16HAcrt23w02r04	1	AF16.20	AF16	23	1/31/15	4	29.27913061	167	347.471264	0.65008513	0.81077074	0.115150752	1
wormd20150131s2AF16HAcrt23w02r05	1	AF16.20	AF16	23	1/31/15	5	30.3403551	101	240.115385	0.15965927	0.35467403	0.115150752	1
wormd20150131s2AF16HAcrt23w02r06	1	AF16.20	AF16	23	1/31/15	6	31.40157959	128	280.606061	0.35659161	0.53181372	0.115150752	1
wormd20150131s2AF16HAcrt23w02r07	1	AF16.20	AF16	23	1/31/15	7	32.46280408	112	316.530973	0.43712463	0.63176521	0.115150752	1
wormd20150131s2AF16HAcrt23w02r08	1	AF16.20	AF16	23	1/31/15	8	33.52402857	179	344.448087	0.39233214	0.67901151	0.115150752	1
wormd20150131s2AF16HAcrt23w02r09	1	AF16.20	AF16	23	1/31/15	9	34.58525306	183	371.484211	0.2324256	0.57729648	0.115150752	1
wormd20150131s2AF16HAcrt23w02r10	1	AF16.20	AF16	23	1/31/15	10	35.64647755	293	293.173333	0.14386408	0.34585949	0.115150752	1
wormd20150131s2AF16HAcrt23w02r11	1	AF16.20	AF16	23	1/31/15	11	36.70770204	278	297.333333	0.12017323	0.34665788	0.115150752	1
wormd20150131s2AF16HAcrt23w02r12	1	AF16.20	AF16	23	1/31/15	12	37.76892653	232	283.358974	0.10294693	0.12872912	0.115150752	0
wormd20150131s2AF16HAcrt23w02r13	1	AF16.20	AF16	23	1/31/15	13	38.83015102	274	282.02847	0.11639707	0.11515075	0.115150752	0
wormd20150131s2AF16HAcrt23w02r14	1	AF16.20	AF16	23	1/31/15	14	39.89137551	275	290.560284	0.12431289	0.12310028	0.115150752	0
wormd20150131s2AF16HAcrt23w02r15	1	AF16.20	AF16	23	1/31/15	15	40.9526	293	310.13	0.11465748	0.11638367	0.115150752	0
wormd20150131s2AF16HAcrt23w03r00	2	AF16.21	AF16	23	1/31/15	0	25.03423265	293	397.303333	0.50839436	0.59713848	0.116137549	1
wormd20150131s2AF16HAcrt23w03r01	2	AF16.21	AF16	23	1/31/15	1	26.09545714	282	419.657439	0.52868011	0.64719572	0.116137549	1
wormd20150131s2AF16HAcrt23w03r02	2	AF16.21	AF16	23	1/31/15	2	27.15668163	246	457.316206	0.54418868	0.63459442	0.116137549	1
wormd20150131s2AF16HAcrt23w03r03	2	AF16.21	AF16	23	1/31/15	3	28.21790612	184	361.433862	0.37320576	0.50398364	0.116137549	1
wormd20150131s2AF16HAcrt23w03r04	2	AF16.21	AF16	23	1/31/15	4	29.27913061	154	184.484277	0.13614627	0.2713545	0.116137549	1
wormd20150131s2AF16HAcrt23w03r05	2	AF16.21	AF16	23	1/31/15	5	30.3403551	154	235.06875	0.20494655	0.34297779	0.116137549	1
wormd20150131s2AF16HAcrt23w03r06	2	AF16.21	AF16	23	1/31/15	6	31.40157959	194	105.353535	0.11385244	0.11613755	0.116137549	0
wormd20150131s2AF16HAcrt23w03r10	2	AF16.21	AF16	23	1/31/15	10	35.64647755	251	385.433071	0.14031654	0.45066862	0.116137549	1
wormd20150131s2AF16HAcrt23w03r11	2	AF16.21	AF16	23	1/31/15	11	36.70770204	258	330.966165	0.09046649	0.22238967	0.116137549	1
wormd20150131s2AF16HAcrt23w03r13	2	AF16.21	AF16	23	1/31/15	13	38.83015102	106	128.458333	0.11348776	0.19785532	0.116137549	1
wormd20150131s2AF16HAcrt23w03r14	2	AF16.21	AF16	23	1/31/15	14	39.89137551	147	113.174497	0.1279338	0.17750771	0.116137549	1
wormd20150131s2AF16HAcrt23w03r15	2	AF16.21	AF16	23	1/31/15	15	40.9526	174	148.270718	0.1068862	0.13983618	0.116137549	0
wormd20150131s2AF16HAcrt23w07r00	6	AF16.22	AF16	23	1/31/15	0	25.03423265	258	383.558491	0.59665575	0.68164311	0.098084116	1
wormd20150131s2AF16HAcrt23w07r01	6	AF16.22	AF16	23	1/31/15	1	26.09545714	250	396.389764	0.57571608	0.70889129	0.098084116	1
wormd20150131s2AF16HAcrt23w07r02	6	AF16.22	AF16	23	1/31/15	2	27.15668163	256	430.038023	0.59920101	0.71842068	0.098084116	1
wormd20150131s2AF16HAcrt23w07r03	6	AF16.22	AF16	23	1/31/15	3	28.21790612	246	444.972332	0.55836738	0.69254479	0.098084116	1
wormd20150131s2AF16HAcrt23w07r04	6	AF16.22	AF16	23	1/31/15	4	29.27913061	209	426.567442	0.58166115	0.75441735	0.098084116	1
wormd20150131s2AF16HAcrt23w07r05	6	AF16.22	AF16	23	1/31/15	5	30.3403551	158	437.95092	0.62946861	0.76450267	0.098084116	1
wormd20150131s2AF16HAcrt23w07r06	6	AF16.22	AF16	23	1/31/15	6	31.40157959	211	464.720183	0.50301887	0.62569333	0.098084116	1
wormd20150131s2AF16HAcrt23w07r07	6	AF16.22	AF16	23	1/31/15	7	32.46280408	140	383.361702	0.44286165	0.71814581	0.098084116	1
wormd20150131s2AF16HAcrt23w07r08	6	AF16.22	AF16	23	1/31/15	8	33.52402857	129	354.984962	0.44849308	0.7098715	0.098084116	1
wormd20150131s2AF16HAcrt23w07r10	6	AF16.22	AF16	23	1/31/15	10	35.64647755	255	362.255725	0.08619737	0.09808412	0.098084116	0
wormd20150131s2AF16HAcrt23w07r12	6	AF16.22	AF16	23	1/31/15	12	37.76892653	159	396.419753	0.075419	0.10739267	0.098084116	0
wormd20150131s2AF16HAcrt23w08r00	7	AF16.23	AF16	23	1/31/15	0	25.03423265	197	357.534314	0.4544753	0.50314246	0.070451536	1
wormd20150131s2AF16HAcrt23w08r01	7	AF16.23	AF16	23	1/31/15	1	26.09545714	139	261.398601	0.12671813	0.23105715	0.070451536	1
wormd20150131s2AF16HAcrt23w08r02	7	AF16.23	AF16	23	1/31/15	2	27.15668163	167	434.497076	0.37667201	0.71571765	0.070451536	1
wormd20150131s2AF16HAcrt23w08r05	7	AF16.23	AF16	23	1/31/15	5	30.3403551	119	451.878049	0.47768578	0.64717685	0.070451536	1
wormd20150131s2AF16HAcrt23w08r06	7	AF16.23	AF16	23	1/31/15	6	31.40157959	152	397.335484	0.43158026	0.69187449	0.070451536	1
wormd20150131s2AF16HAcrt23w08r09	7	AF16.23	AF16	23	1/31/15	9	34.58525306	136	464.232558	0.20475976	0.60690007	0.070451536	1
wormd20150131s2AF16HAcrt23w08r10	7	AF16.23	AF16	23	1/31/15	10	35.64647755	293	381.793333	0.06897691	0.07045154	0.070451536	0
wormd20150131s2AF16HAcrt23w08r11	7	AF16.23	AF16	23	1/31/15	11	36.70770204	277	376.062284	0.08247535	0.21405725	0.070451536	1
wormd20150131s2AF16HAcrt23w08r12	7	AF16.23	AF16	23	1/31/15	12	37.76892653	293	352.153333	0.08337336	0.1482684	0.070451536	1
wormd20150131s2AF16HAcrt23w08r13	7	AF16.23	AF16	23	1/31/15	13	38.83015102	293	371.403333	0.08070512	0.08053966	0.070451536	0
wormd20150131s2AF16HAcrt23w08r14	7	AF16.23	AF16	23	1/31/15	14	39.89137551	293	394.463333	0.08114269	0.08037266	0.070451536	0
wormd20150131s2AF16HAcrt23w08r15	7	AF16.23	AF16	23	1/31/15	15	40.9526	293	404.326667	0.07893649	0.07887956	0.070451536	0
wormd20150131s2AF16HAcrt23w09r00	8	AF16.24	AF16	23	1/31/15	0	25.03423265	280	383.334495	0.47739353	0.58110582	0.092267274	1
wormd20150131s2AF16HAcrt23w09r03	8	AF16.24	AF16	23	1/31/15	3	28.21790612	140	405.634483	0.53177536	0.71426874	0.092267274	1
wormd20150131s2AF16HAcrt23w09r09	8	AF16.24	AF16	23	1/31/15	9	34.58525306	258	383.034364	0.0984756	0.13522739	0.092267274	0
wormd20150131s2AF16HAcrt23w09r10	8	AF16.24	AF16	23	1/31/15	10	35.64647755	258	336.613475	0.09925048	0.17247414	0.092267274	1
wormd20150131s2AF16HAcrt23w09r12	8	AF16.24	AF16	23	1/31/15	12	37.76892653	293	350.556667	0.08990823	0.09724	0.092267274	0
wormd20150131s2AF16HAcrt23w09r13	8	AF16.24	AF16	23	1/31/15	13	38.83015102	293	350.76	0.09279857	0.09226727	0.092267274	0
wormd20150131s2AF16HAcrt23w09r14	8	AF16.24	AF16	23	1/31/15	14	39.89137551	293	347.146667	0.09389579	0.0942939	0.092267274	0
wormd20150131s2AF16HAcrt23w09r15	8	AF16.24	AF16	23	1/31/15	15	40.9526	293	345.616667	0.09440865	0.09442564	0.092267274	0
wormd20150131s2AF16HAcrt23w13r00	12	AF16.25	AF16	23	1/31/15	0	25.03423265	293	567.42	0.41827665	0.54711386	0.079462479	1
wormd20150131s2AF16HAcrt23w13r01	12	AF16.25	AF16	23	1/31/15	1	26.09545714	243	565.295455	0.42166239	0.56604897	0.079462479	1
wormd20150131s2AF16HAcrt23w13r02	12	AF16.25	AF16	23	1/31/15	2	27.15668163	230	576.254098	0.46811061	0.58320939	0.079462479	1
wormd20150131s2AF16HAcrt23w13r03	12	AF16.25	AF16	23	1/31/15	3	28.21790612	217	467.513393	0.46661638	0.56633539	0.079462479	1
wormd20150131s2AF16HAcrt23w13r04	12	AF16.25	AF16	23	1/31/15	4	29.27913061	202	591.877828	0.52673812	0.66082652	0.079462479	1
wormd20150131s2AF16HAcrt23w13r05	12	AF16.25	AF16	23	1/31/15	5	30.3403551	204	575.582938	0.46536419	0.67881848	0.079462479	1
wormd20150131s2AF16HAcrt23w13r06	12	AF16.25	AF16	23	1/31/15	6	31.40157959	198	575.485577	0.52570775	0.65670664	0.079462479	1
wormd20150131s2AF16HAcrt23w13r07	12	AF16.25	AF16	23	1/31/15	7	32.46280408	269	596.068966	0.48065737	0.63891198	0.079462479	1
wormd20150131s2AF16HAcrt23w13r08	12	AF16.25	AF16	23	1/31/15	8	33.52402857	229	598.296443	0.42212831	0.58694966	0.079462479	1
wormd20150131s2AF16HAcrt23w13r09	12	AF16.25	AF16	23	1/31/15	9	34.58525306	219	667.429119	0.3226946	0.55069386	0.079462479	1
wormd20150131s2AF16HAcrt23w13r10	12	AF16.25	AF16	23	1/31/15	10	35.64647755	100	431.05042	0.17564902	0.31512539	0.079462479	1
wormd20150131s2AF16HAcrt23w13r11	12	AF16.25	AF16	23	1/31/15	11	36.70770204	293	484.606667	0.08409103	0.14014275	0.079462479	1
wormd20150131s2AF16HAcrt23w13r12	12	AF16.25	AF16	23	1/31/15	12	37.76892653	293	473.466667	0.0794006	0.07946248	0.079462479	0
wormd20150131s2AF16HAcrt23w13r13	12	AF16.25	AF16	23	1/31/15	13	38.83015102	293	477.686667	0.08232377	0.08182132	0.079462479	0
wormd20150131s2AF16HAcrt23w14r00	13	AF16.26	AF16	23	1/31/15	0	25.03423265	284	400.656357	0.5954771	0.65212649	0.078271055	1
wormd20150131s2AF16HAcrt23w14r01	13	AF16.26	AF16	23	1/31/15	1	26.09545714	285	454.924399	0.52333567	0.67976452	0.078271055	1
wormd20150131s2AF16HAcrt23w14r02	13	AF16.26	AF16	23	1/31/15	2	27.15668163	204	483.085308	0.51820287	0.6487218	0.078271055	1
wormd20150131s2AF16HAcrt23w14r03	13	AF16.26	AF16	23	1/31/15	3	28.21790612	283	481.241379	0.53590732	0.72671753	0.078271055	1
wormd20150131s2AF16HAcrt23w14r07	13	AF16.26	AF16	23	1/31/15	7	32.46280408	151	459.449438	0.4587841	0.59291147	0.078271055	1
wormd20150131s2AF16HAcrt23w14r08	13	AF16.26	AF16	23	1/31/15	8	33.52402857	282	460.089965	0.43721532	0.57530404	0.078271055	1
wormd20150131s2AF16HAcrt23w14r09	13	AF16.26	AF16	23	1/31/15	9	34.58525306	143	437.522581	0.42315101	0.66003694	0.078271055	1
wormd20150131s2AF16HAcrt23w14r10	13	AF16.26	AF16	23	1/31/15	10	35.64647755	290	442.087542	0.07076778	0.0919071	0.078271055	0
wormd20150131s2AF16HAcrt23w14r12	13	AF16.26	AF16	23	1/31/15	12	37.76892653	124	367.779221	0.08277772	0.12401297	0.078271055	0
wormd20150131s2AF16HAcrt23w14r13	13	AF16.26	AF16	23	1/31/15	13	38.83015102	282	367.391892	0.08415169	0.08883952	0.078271055	0
wormd20150131s2AF16HAcrt23w14r14	13	AF16.26	AF16	23	1/31/15	14	39.89137551	193	372.262963	0.07928763	0.07827105	0.078271055	0
wormd20150131s2AF16HAcrt23w14r15	13	AF16.26	AF16	23	1/31/15	15	40.9526	293	404.983333	0.08336777	0.08450974	0.078271055	0
wormd20150131s2AF16HAcrt23w15r00	14	AF16.27	AF16	23	1/31/15	0	25.03423265	249	258.098039	0.49358896	0.78909533	0.142401272	1
wormd20150131s2AF16HAcrt23w15r01	14	AF16.27	AF16	23	1/31/15	1	26.09545714	191	286.348718	0.63027732	0.77533555	0.142401272	1
wormd20150131s2AF16HAcrt23w15r02	14	AF16.27	AF16	23	1/31/15	2	27.15668163	235	294.891667	0.62662927	0.76273651	0.142401272	1
wormd20150131s2AF16HAcrt23w15r04	14	AF16.27	AF16	23	1/31/15	4	29.27913061	153	309.81875	0.54610398	0.75499161	0.142401272	1
wormd20150131s2AF16HAcrt23w15r05	14	AF16.27	AF16	23	1/31/15	5	30.3403551	106	263.893805	0.51024451	0.69631418	0.142401272	1
wormd20150131s2AF16HAcrt23w15r06	14	AF16.27	AF16	23	1/31/15	6	31.40157959	160	250.808642	0.50451421	0.74531531	0.142401272	1
wormd20150131s2AF16HAcrt23w15r08	14	AF16.27	AF16	23	1/31/15	8	33.52402857	120	203.672	0.44383207	0.65661155	0.142401272	1
wormd20150131s2AF16HAcrt23w15r09	14	AF16.27	AF16	23	1/31/15	9	34.58525306	110	212.530303	0.40743929	0.75917333	0.142401272	1
wormd20150131s2AF16HAcrt23w15r10	14	AF16.27	AF16	23	1/31/15	10	35.64647755	293	201.87	0.13487521	0.15806141	0.142401272	1
wormd20150131s2AF16HAcrt23w15r11	14	AF16.27	AF16	23	1/31/15	11	36.70770204	271	203.113879	0.11700699	0.14240127	0.142401272	1
wormd20150131s2AF16HAcrt23w15r12	14	AF16.27	AF16	23	1/31/15	12	37.76892653	279	210.454545	0.14299963	0.31346468	0.142401272	1
wormd20150131s3AF16HK104rt23w01r00	0	AF16.28	AF16	23	1/31/15	0	25.03423265	192	399.164251	0.45991886	0.47133179	0.138773986	1
wormd20150131s3AF16HK104rt23w01r01	0	AF16.28	AF16	23	1/31/15	1	26.09545714	184	533.625	0.42450775	0.53416244	0.138773986	1
wormd20150131s3AF16HK104rt23w01r02	0	AF16.28	AF16	23	1/31/15	2	27.15668163	172	584.243243	0.41728587	0.5981138	0.138773986	1
wormd20150131s3AF16HK104rt23w01r03	0	AF16.28	AF16	23	1/31/15	3	28.21790612	104	523.048	0.46428074	0.58462639	0.138773986	1
wormd20150131s3AF16HK104rt23w01r05	0	AF16.28	AF16	23	1/31/15	5	30.3403551	104	521.099099	0.45734291	0.59730709	0.138773986	1
wormd20150131s3AF16HK104rt23w01r08	0	AF16.28	AF16	23	1/31/15	8	33.52402857	220	568.386667	0.34830106	0.53105348	0.138773986	1
wormd20150131s3AF16HK104rt23w01r10	0	AF16.28	AF16	23	1/31/15	10	35.64647755	103	473.127273	0.26566764	0.447249	0.138773986	1
wormd20150131s3AF16HK104rt23w01r15	0	AF16.28	AF16	23	1/31/15	15	40.9526	108	152.513761	0.09589851	0.13877399	0.138773986	0
wormd20150131s3AF16HK104rt23w02r00	1	AF16.29	AF16	23	1/31/15	0	25.03423265	264	425.730627	0.50167324	0.54424942	0.055590555	1
wormd20150131s3AF16HK104rt23w02r02	1	AF16.29	AF16	23	1/31/15	2	27.15668163	224	245.246753	0.13325003	0.17079991	0.055590555	1
wormd20150131s3AF16HK104rt23w02r03	1	AF16.29	AF16	23	1/31/15	3	28.21790612	127	214.597015	0.07810796	0.07993778	0.055590555	0
wormd20150131s3AF16HK104rt23w02r04	1	AF16.29	AF16	23	1/31/15	4	29.27913061	158	214.679012	0.07797146	0.07778991	0.055590555	0
wormd20150131s3AF16HK104rt23w02r05	1	AF16.29	AF16	23	1/31/15	5	30.3403551	124	227.694444	0.09701061	0.10373324	0.055590555	0
wormd20150131s3AF16HK104rt23w02r06	1	AF16.29	AF16	23	1/31/15	6	31.40157959	104	222.711111	0.09620315	0.10051365	0.055590555	0
wormd20150131s3AF16HK104rt23w02r07	1	AF16.29	AF16	23	1/31/15	7	32.46280408	156	328.754601	0.18252004	0.22898533	0.055590555	1
wormd20150131s3AF16HK104rt23w02r09	1	AF16.29	AF16	23	1/31/15	9	34.58525306	130	257.625	0.17840966	0.2657378	0.055590555	1
wormd20150131s3AF16HK104rt23w02r10	1	AF16.29	AF16	23	1/31/15	10	35.64647755	138	337.834483	0.13864458	0.31842909	0.055590555	1
wormd20150131s3AF16HK104rt23w02r11	1	AF16.29	AF16	23	1/31/15	11	36.70770204	284	197.612457	0.05747436	0.05559055	0.055590555	0
wormd20150131s3AF16HK104rt23w02r12	1	AF16.29	AF16	23	1/31/15	12	37.76892653	202	331.632813	0.0621645	0.08875982	0.055590555	0
wormd20150131s3AF16HK104rt23w02r13	1	AF16.29	AF16	23	1/31/15	13	38.83015102	271	449.619863	0.09444625	0.1048797	0.055590555	0
wormd20150131s3AF16HK104rt23w02r14	1	AF16.29	AF16	23	1/31/15	14	39.89137551	293	451.22	0.11105379	0.10981063	0.055590555	0
wormd20150131s3AF16HK104rt23w02r15	1	AF16.29	AF16	23	1/31/15	15	40.9526	293	453.4	0.10647424	0.10472667	0.055590555	0
wormd20150131s3AF16HK104rt23w03r00	2	AF16.30	AF16	23	1/31/15	0	25.03423265	198	523.731707	0.43147254	0.47282796	0.084497204	1
wormd20150131s3AF16HK104rt23w03r06	2	AF16.30	AF16	23	1/31/15	6	31.40157959	164	526.187135	0.5508588	0.74630925	0.084497204	1
wormd20150131s3AF16HK104rt23w03r07	2	AF16.30	AF16	23	1/31/15	7	32.46280408	167	512.064171	0.5079416	0.68461679	0.084497204	1
wormd20150131s3AF16HK104rt23w03r09	2	AF16.30	AF16	23	1/31/15	9	34.58525306	220	479.497817	0.35760293	0.57725937	0.084497204	1
wormd20150131s3AF16HK104rt23w03r10	2	AF16.30	AF16	23	1/31/15	10	35.64647755	166	492.810651	0.18189297	0.46676708	0.084497204	1
wormd20150131s3AF16HK104rt23w03r11	2	AF16.30	AF16	23	1/31/15	11	36.70770204	293	481.526667	0.08389873	0.12842687	0.084497204	0
wormd20150131s3AF16HK104rt23w03r12	2	AF16.30	AF16	23	1/31/15	12	37.76892653	293	500.516667	0.0859161	0.11659217	0.084497204	0
wormd20150131s3AF16HK104rt23w03r13	2	AF16.30	AF16	23	1/31/15	13	38.83015102	293	475.656667	0.08406804	0.08478653	0.084497204	0
wormd20150131s3AF16HK104rt23w03r14	2	AF16.30	AF16	23	1/31/15	14	39.89137551	293	471.636667	0.08370713	0.0844972	0.084497204	0
wormd20150131s3AF16HK104rt23w03r15	2	AF16.30	AF16	23	1/31/15	15	40.9526	293	528.49	0.0848144	0.08893736	0.084497204	0
wormd20150131s3AF16HK104rt23w07r00	6	AF16.31	AF16	23	1/31/15	0	25.03423265	215	329.626126	0.21933654	0.19074555	0.072030806	1
wormd20150131s3AF16HK104rt23w07r01	6	AF16.31	AF16	23	1/31/15	1	26.09545714	293	634.68	0.50731873	0.56659189	0.072030806	1
wormd20150131s3AF16HK104rt23w07r02	6	AF16.31	AF16	23	1/31/15	2	27.15668163	113	550.177305	0.40937666	0.48995323	0.072030806	1
wormd20150131s3AF16HK104rt23w07r03	6	AF16.31	AF16	23	1/31/15	3	28.21790612	186	558.238342	0.53307228	0.64415197	0.072030806	1
wormd20150131s3AF16HK104rt23w07r06	6	AF16.31	AF16	23	1/31/15	6	31.40157959	103	595.72093	0.41043326	0.61201237	0.072030806	1
wormd20150131s3AF16HK104rt23w07r07	6	AF16.31	AF16	23	1/31/15	7	32.46280408	207	631.281385	0.57713109	0.73481698	0.072030806	1
wormd20150131s3AF16HK104rt23w07r10	6	AF16.31	AF16	23	1/31/15	10	35.64647755	269	525.56383	0.12366536	0.2086629	0.072030806	1
wormd20150131s3AF16HK104rt23w07r11	6	AF16.31	AF16	23	1/31/15	11	36.70770204	293	499.606667	0.08468895	0.14502662	0.072030806	1
wormd20150131s3AF16HK104rt23w07r12	6	AF16.31	AF16	23	1/31/15	12	37.76892653	293	553.456667	0.08129754	0.08132089	0.072030806	0
wormd20150131s3AF16HK104rt23w07r13	6	AF16.31	AF16	23	1/31/15	13	38.83015102	293	575.79	0.08315688	0.08376487	0.072030806	0
wormd20150131s3AF16HK104rt23w07r14	6	AF16.31	AF16	23	1/31/15	14	39.89137551	293	606.53	0.07206747	0.07203081	0.072030806	0
wormd20150131s3AF16HK104rt23w07r15	6	AF16.31	AF16	23	1/31/15	15	40.9526	293	623.163333	0.07091456	0.07207851	0.072030806	0
wormd20150131s3AF16HK104rt23w08r00	7	AF16.32	AF16	23	1/31/15	0	25.03423265	230	240.151899	0.34720277	0.40081507	0.093065411	1
wormd20150131s3AF16HK104rt23w08r10	7	AF16.32	AF16	23	1/31/15	10	35.64647755	103	244.263682	0.1667108	0.44509597	0.093065411	1
wormd20150131s3AF16HK104rt23w08r11	7	AF16.32	AF16	23	1/31/15	11	36.70770204	293	329.493333	0.10348343	0.10369648	0.093065411	0
wormd20150131s3AF16HK104rt23w08r12	7	AF16.32	AF16	23	1/31/15	12	37.76892653	293	347.863333	0.09437334	0.13046833	0.093065411	0
wormd20150131s3AF16HK104rt23w08r13	7	AF16.32	AF16	23	1/31/15	13	38.83015102	293	355.483333	0.0956936	0.09701979	0.093065411	0
wormd20150131s3AF16HK104rt23w08r14	7	AF16.32	AF16	23	1/31/15	14	39.89137551	293	335.166667	0.09371785	0.09306541	0.093065411	0
wormd20150131s3AF16HK104rt23w08r15	7	AF16.32	AF16	23	1/31/15	15	40.9526	293	327.066667	0.10014238	0.09835898	0.093065411	0
wormd20150131s3AF16HK104rt23w09r00	8	AF16.33	AF16	23	1/31/15	0	25.03423265	128	450.364964	0.48923211	0.56638976	0.166271062	1
wormd20150131s3AF16HK104rt23w09r01	8	AF16.33	AF16	23	1/31/15	1	26.09545714	178	459.933702	0.47049562	0.60265793	0.166271062	1
wormd20150131s3AF16HK104rt23w09r05	8	AF16.33	AF16	23	1/31/15	5	30.3403551	123	107.815385	0.25508206	0.26116429	0.166271062	1
wormd20150131s3AF16HK104rt23w09r06	8	AF16.33	AF16	23	1/31/15	6	31.40157959	265	133.816547	0.24874883	0.2529523	0.166271062	1
wormd20150131s3AF16HK104rt23w09r07	8	AF16.33	AF16	23	1/31/15	7	32.46280408	278	163.849123	0.2423063	0.24780056	0.166271062	1
wormd20150131s3AF16HK104rt23w09r08	8	AF16.33	AF16	23	1/31/15	8	33.52402857	241	190.076923	0.23113285	0.24610622	0.166271062	1
wormd20150131s3AF16HK104rt23w09r09	8	AF16.33	AF16	23	1/31/15	9	34.58525306	158	258.751515	0.20303438	0.29564906	0.166271062	1
wormd20150131s3AF16HK104rt23w09r10	8	AF16.33	AF16	23	1/31/15	10	35.64647755	191	418.5	0.18990108	0.24783392	0.166271062	1
wormd20150131s3AF16HK104rt23w09r11	8	AF16.33	AF16	23	1/31/15	11	36.70770204	224	454.013043	0.18433052	0.22374285	0.166271062	1
wormd20150131s3AF16HK104rt23w09r12	8	AF16.33	AF16	23	1/31/15	12	37.76892653	259	484.154135	0.17465074	0.19004234	0.166271062	1
wormd20150131s3AF16HK104rt23w09r13	8	AF16.33	AF16	23	1/31/15	13	38.83015102	284	509.768966	0.17140736	0.17744702	0.166271062	1
wormd20150131s3AF16HK104rt23w09r14	8	AF16.33	AF16	23	1/31/15	14	39.89137551	293	529.41	0.16960488	0.17131576	0.166271062	1
wormd20150131s3AF16HK104rt23w09r15	8	AF16.33	AF16	23	1/31/15	15	40.9526	293	533.146667	0.16569455	0.16627106	0.166271062	1
wormd20150131s3AF16HK104rt23w14r00	13	AF16.35	AF16	23	1/31/15	0	25.03423265	273	362.771429	0.36210814	0.45894066	0.093678866	1
wormd20150131s3AF16HK104rt23w14r01	13	AF16.35	AF16	23	1/31/15	1	26.09545714	211	301.786047	0.11284327	0.1076211	0.093678866	0
wormd20150131s3AF16HK104rt23w14r03	13	AF16.35	AF16	23	1/31/15	3	28.21790612	150	440.821656	0.4771253	0.68678807	0.093678866	1
wormd20150131s3AF16HK104rt23w14r05	13	AF16.35	AF16	23	1/31/15	5	30.3403551	203	384.4	0.47555631	0.67044469	0.093678866	1
wormd20150131s3AF16HK104rt23w14r06	13	AF16.35	AF16	23	1/31/15	6	31.40157959	173	376.382979	0.4878423	0.65439036	0.093678866	1
wormd20150131s3AF16HK104rt23w14r09	13	AF16.35	AF16	23	1/31/15	9	34.58525306	264	453.370909	0.13027916	0.25521567	0.093678866	1
wormd20150131s3AF16HK104rt23w14r10	13	AF16.35	AF16	23	1/31/15	10	35.64647755	293	478.786667	0.10074627	0.22148168	0.093678866	1
wormd20150131s3AF16HK104rt23w14r11	13	AF16.35	AF16	23	1/31/15	11	36.70770204	293	545.37	0.07812275	0.09397749	0.093678866	0
wormd20150131s3AF16HK104rt23w14r12	13	AF16.35	AF16	23	1/31/15	12	37.76892653	293	407.07	0.09999745	0.10126815	0.093678866	0
wormd20150131s3AF16HK104rt23w14r13	13	AF16.35	AF16	23	1/31/15	13	38.83015102	293	440.723333	0.09341	0.09367887	0.093678866	0
wormd20150131s3AF16HK104rt23w14r14	13	AF16.35	AF16	23	1/31/15	14	39.89137551	293	417.96	0.1025244	0.10246914	0.093678866	0
wormd20150131s3AF16HK104rt23w14r15	13	AF16.35	AF16	23	1/31/15	15	40.9526	293	422.836667	0.09876713	0.09785659	0.093678866	0
wormd20150131s3AF16HK104rt23w15r00	14	AF16.36	AF16	23	1/31/15	0	25.03423265	247	350.909449	0.48234105	0.57797492	0.170409292	1
wormd20150131s3AF16HK104rt23w15r05	14	AF16.36	AF16	23	1/31/15	5	30.3403551	109	171.133858	0.27673324	0.30781961	0.170409292	1
wormd20150131s3AF16HK104rt23w15r06	14	AF16.36	AF16	23	1/31/15	6	31.40157959	137	237.986014	0.22091633	0.23173749	0.170409292	1
wormd20150131s3AF16HK104rt23w15r07	14	AF16.36	AF16	23	1/31/15	7	32.46280408	106	262.327273	0.19323065	0.19571074	0.170409292	1
wormd20150131s3AF16HK104rt23w15r15	14	AF16.36	AF16	23	1/31/15	15	40.9526	109	489.166667	0.12814156	0.17040929	0.170409292	1
wormd20150131s5AHcAF16rt23w04r00	3	AF16.37	AF16	23	1/31/15	0	25.03423265	285	646.674658	0.53563255	0.72334535	0.076791361	1
wormd20150131s5AHcAF16rt23w04r01	3	AF16.37	AF16	23	1/31/15	1	26.09545714	214	641.986364	0.59910707	0.78105934	0.076791361	1
wormd20150131s5AHcAF16rt23w04r02	3	AF16.37	AF16	23	1/31/15	2	27.15668163	130	686.333333	0.6088747	0.75337555	0.076791361	1
wormd20150131s5AHcAF16rt23w04r03	3	AF16.37	AF16	23	1/31/15	3	28.21790612	243	669.590909	0.59067046	0.77026812	0.076791361	1
wormd20150131s5AHcAF16rt23w04r05	3	AF16.37	AF16	23	1/31/15	5	30.3403551	268	662.068592	0.52022253	0.72404047	0.076791361	1
wormd20150131s5AHcAF16rt23w04r06	3	AF16.37	AF16	23	1/31/15	6	31.40157959	161	693.412371	0.49242566	0.72554972	0.076791361	1
wormd20150131s5AHcAF16rt23w04r07	3	AF16.37	AF16	23	1/31/15	7	32.46280408	189	635.63964	0.5192291	0.68855436	0.076791361	1
wormd20150131s5AHcAF16rt23w04r11	3	AF16.37	AF16	23	1/31/15	11	36.70770204	293	733.1	0.07824471	0.07894666	0.076791361	0
wormd20150131s5AHcAF16rt23w04r12	3	AF16.37	AF16	23	1/31/15	12	37.76892653	241	719.052419	0.07668455	0.07679136	0.076791361	0
wormd20150131s5AHcAF16rt23w05r00	4	AF16.38	AF16	23	1/31/15	0	25.03423265	271	499.633094	0.55974444	0.71858154	0.087517236	1
wormd20150131s5AHcAF16rt23w05r01	4	AF16.38	AF16	23	1/31/15	1	26.09545714	168	526.063584	0.56187324	0.75389317	0.087517236	1
wormd20150131s5AHcAF16rt23w05r02	4	AF16.38	AF16	23	1/31/15	2	27.15668163	114	470.297521	0.44811162	0.61645481	0.087517236	1
wormd20150131s5AHcAF16rt23w05r03	4	AF16.38	AF16	23	1/31/15	3	28.21790612	104	399.183486	0.3839002	0.47369897	0.087517236	1
wormd20150131s5AHcAF16rt23w05r04	4	AF16.38	AF16	23	1/31/15	4	29.27913061	147	403.573171	0.33137066	0.40564693	0.087517236	1
wormd20150131s5AHcAF16rt23w05r05	4	AF16.38	AF16	23	1/31/15	5	30.3403551	239	376.110672	0.29907984	0.38868304	0.087517236	1
wormd20150131s5AHcAF16rt23w05r06	4	AF16.38	AF16	23	1/31/15	6	31.40157959	235	348.38843	0.2828973	0.32020041	0.087517236	1
wormd20150131s5AHcAF16rt23w05r07	4	AF16.38	AF16	23	1/31/15	7	32.46280408	118	489.167883	0.45644486	0.57744308	0.087517236	1
wormd20150131s5AHcAF16rt23w05r09	4	AF16.38	AF16	23	1/31/15	9	34.58525306	172	442.849162	0.1095123	0.19454175	0.087517236	1
wormd20150131s5AHcAF16rt23w05r10	4	AF16.38	AF16	23	1/31/15	10	35.64647755	293	435.71	0.10780114	0.20852209	0.087517236	1
wormd20150131s5AHcAF16rt23w05r11	4	AF16.38	AF16	23	1/31/15	11	36.70770204	293	425.696667	0.10149645	0.11036471	0.087517236	0
wormd20150131s5AHcAF16rt23w05r12	4	AF16.38	AF16	23	1/31/15	12	37.76892653	293	443.56	0.09587198	0.09595506	0.087517236	0
wormd20150131s5AHcAF16rt23w05r13	4	AF16.38	AF16	23	1/31/15	13	38.83015102	293	464.046667	0.0949679	0.09560081	0.087517236	0
wormd20150131s5AHcAF16rt23w05r14	4	AF16.38	AF16	23	1/31/15	14	39.89137551	293	499.42	0.09030775	0.09049575	0.087517236	0
wormd20150131s5AHcAF16rt23w05r15	4	AF16.38	AF16	23	1/31/15	15	40.9526	293	495.516667	0.08713525	0.08751724	0.087517236	0
wormd20150131s5AHcAF16rt23w06r00	5	AF16.39	AF16	23	1/31/15	0	25.03423265	278	493.726316	0.52567756	0.66442803	0.084316003	1
wormd20150131s5AHcAF16rt23w06r01	5	AF16.39	AF16	23	1/31/15	1	26.09545714	180	441.967391	0.53699604	0.68304583	0.084316003	1
wormd20150131s5AHcAF16rt23w06r02	5	AF16.39	AF16	23	1/31/15	2	27.15668163	220	533.890351	0.5373401	0.64822134	0.084316003	1
wormd20150131s5AHcAF16rt23w06r04	5	AF16.39	AF16	23	1/31/15	4	29.27913061	266	466.377289	0.59985036	0.75015058	0.084316003	1
wormd20150131s5AHcAF16rt23w06r05	5	AF16.39	AF16	23	1/31/15	5	30.3403551	184	443.612745	0.53540968	0.69795411	0.084316003	1
wormd20150131s5AHcAF16rt23w06r06	5	AF16.39	AF16	23	1/31/15	6	31.40157959	143	477.960265	0.4241275	0.66395808	0.084316003	1
wormd20150131s5AHcAF16rt23w06r07	5	AF16.39	AF16	23	1/31/15	7	32.46280408	278	492.796491	0.47063283	0.65149494	0.084316003	1
wormd20150131s5AHcAF16rt23w06r08	5	AF16.39	AF16	23	1/31/15	8	33.52402857	181	383.723404	0.10664092	0.17828134	0.084316003	1
wormd20150131s5AHcAF16rt23w06r09	5	AF16.39	AF16	23	1/31/15	9	34.58525306	167	350.096045	0.09179669	0.09186572	0.084316003	0
wormd20150131s5AHcAF16rt23w06r10	5	AF16.39	AF16	23	1/31/15	10	35.64647755	164	374.941176	0.09981913	0.22729222	0.084316003	1
wormd20150131s5AHcAF16rt23w06r11	5	AF16.39	AF16	23	1/31/15	11	36.70770204	160	405.801205	0.12280465	0.12926335	0.084316003	0
wormd20150131s5AHcAF16rt23w06r12	5	AF16.39	AF16	23	1/31/15	12	37.76892653	293	394.25	0.09374265	0.09315086	0.084316003	0
wormd20150131s5AHcAF16rt23w06r13	5	AF16.39	AF16	23	1/31/15	13	38.83015102	293	382.243333	0.09070541	0.09152125	0.084316003	0
wormd20150131s5AHcAF16rt23w06r14	5	AF16.39	AF16	23	1/31/15	14	39.89137551	293	389.266667	0.08961652	0.08956556	0.084316003	0
wormd20150131s5AHcAF16rt23w06r15	5	AF16.39	AF16	23	1/31/15	15	40.9526	293	406.323333	0.0839536	0.084316	0.084316003	0
wormd20150131s5AHcAF16rt23w10r00	9	AF16.40	AF16	23	1/31/15	0	25.03423265	243	539.96	0.54808362	0.6893553	0.093183616	1
wormd20150131s5AHcAF16rt23w10r01	9	AF16.40	AF16	23	1/31/15	1	26.09545714	184	558.825688	0.57844721	0.73063248	0.093183616	1
wormd20150131s5AHcAF16rt23w10r04	9	AF16.40	AF16	23	1/31/15	4	29.27913061	178	568.877273	0.49318024	0.69561194	0.093183616	1
wormd20150131s5AHcAF16rt23w10r08	9	AF16.40	AF16	23	1/31/15	8	33.52402857	293	442.456667	0.11119729	0.11250799	0.093183616	0
wormd20150131s5AHcAF16rt23w10r09	9	AF16.40	AF16	23	1/31/15	9	34.58525306	293	431.87	0.11759561	0.11730507	0.093183616	0
wormd20150131s5AHcAF16rt23w10r10	9	AF16.40	AF16	23	1/31/15	10	35.64647755	293	448.163333	0.11303461	0.14264668	0.093183616	1
wormd20150131s5AHcAF16rt23w10r11	9	AF16.40	AF16	23	1/31/15	11	36.70770204	293	450.56	0.11063971	0.11279532	0.093183616	0
wormd20150131s5AHcAF16rt23w10r12	9	AF16.40	AF16	23	1/31/15	12	37.76892653	293	484.23	0.09964221	0.09953117	0.093183616	0
wormd20150131s5AHcAF16rt23w10r13	9	AF16.40	AF16	23	1/31/15	13	38.83015102	293	505	0.10173375	0.10229709	0.093183616	0
wormd20150131s5AHcAF16rt23w10r14	9	AF16.40	AF16	23	1/31/15	14	39.89137551	293	511.73	0.09898491	0.09971382	0.093183616	0
wormd20150131s5AHcAF16rt23w10r15	9	AF16.40	AF16	23	1/31/15	15	40.9526	293	500.12	0.09359175	0.09318362	0.093183616	0
wormd20150131s5AHcAF16rt23w11r00	10	AF16.41	AF16	23	1/31/15	0	25.03423265	291	676.344482	0.4890639	0.61567886	0.078495551	1
wormd20150131s5AHcAF16rt23w11r01	10	AF16.41	AF16	23	1/31/15	1	26.09545714	178	417.84153	0.25771503	0.36862901	0.078495551	1
wormd20150131s5AHcAF16rt23w11r02	10	AF16.41	AF16	23	1/31/15	2	27.15668163	125	538.007752	0.3728289	0.53438527	0.078495551	1
wormd20150131s5AHcAF16rt23w11r03	10	AF16.41	AF16	23	1/31/15	3	28.21790612	189	685.647959	0.43867576	0.63723094	0.078495551	1
wormd20150131s5AHcAF16rt23w11r04	10	AF16.41	AF16	23	1/31/15	4	29.27913061	150	692.256098	0.43635286	0.662815	0.078495551	1
wormd20150131s5AHcAF16rt23w11r05	10	AF16.41	AF16	23	1/31/15	5	30.3403551	179	544.778325	0.30008337	0.52522688	0.078495551	1
wormd20150131s5AHcAF16rt23w11r06	10	AF16.41	AF16	23	1/31/15	6	31.40157959	175	649.674897	0.48048717	0.69993084	0.078495551	1
wormd20150131s5AHcAF16rt23w11r08	10	AF16.41	AF16	23	1/31/15	8	33.52402857	253	595.594796	0.14538719	0.23355661	0.078495551	1
wormd20150131s5AHcAF16rt23w11r09	10	AF16.41	AF16	23	1/31/15	9	34.58525306	293	578.216667	0.09512268	0.09504326	0.078495551	0
wormd20150131s5AHcAF16rt23w11r10	10	AF16.41	AF16	23	1/31/15	10	35.64647755	293	578.58	0.09317994	0.09294465	0.078495551	0
wormd20150131s5AHcAF16rt23w11r11	10	AF16.41	AF16	23	1/31/15	11	36.70770204	293	568.243333	0.09360405	0.09401596	0.078495551	0
wormd20150131s5AHcAF16rt23w11r12	10	AF16.41	AF16	23	1/31/15	12	37.76892653	293	601.98	0.08683795	0.08688337	0.078495551	0
wormd20150131s5AHcAF16rt23w11r13	10	AF16.41	AF16	23	1/31/15	13	38.83015102	293	598.33	0.09158291	0.09156335	0.078495551	0
wormd20150131s5AHcAF16rt23w11r14	10	AF16.41	AF16	23	1/31/15	14	39.89137551	293	597.87	0.08349986	0.08332383	0.078495551	0
wormd20150131s5AHcAF16rt23w11r15	10	AF16.41	AF16	23	1/31/15	15	40.9526	293	597.476667	0.0790375	0.07849555	0.078495551	0
wormd20150131s5AHcAF16rt23w12r00	11	AF16.42	AF16	23	1/31/15	0	25.03423265	232	644.691489	0.43021725	0.6053738	0.102468139	1
wormd20150131s5AHcAF16rt23w12r01	11	AF16.42	AF16	23	1/31/15	1	26.09545714	188	649.016598	0.41610392	0.56270984	0.102468139	1
wormd20150131s5AHcAF16rt23w12r02	11	AF16.42	AF16	23	1/31/15	2	27.15668163	148	645.125604	0.41538093	0.66445904	0.102468139	1
wormd20150131s5AHcAF16rt23w12r04	11	AF16.42	AF16	23	1/31/15	4	29.27913061	281	182.171329	0.24290213	0.24429341	0.102468139	1
wormd20150131s5AHcAF16rt23w12r05	11	AF16.42	AF16	23	1/31/15	5	30.3403551	293	233.726667	0.20336019	0.20551727	0.102468139	1
wormd20150131s5AHcAF16rt23w12r06	11	AF16.42	AF16	23	1/31/15	6	31.40157959	293	275.636667	0.18985009	0.19016278	0.102468139	1
wormd20150131s5AHcAF16rt23w12r07	11	AF16.42	AF16	23	1/31/15	7	32.46280408	293	316.353333	0.18965983	0.18862739	0.102468139	1
wormd20150131s5AHcAF16rt23w12r08	11	AF16.42	AF16	23	1/31/15	8	33.52402857	293	386.613333	0.16709886	0.16976087	0.102468139	1
wormd20150131s5AHcAF16rt23w12r09	11	AF16.42	AF16	23	1/31/15	9	34.58525306	293	421.163333	0.1516783	0.15085339	0.102468139	1
wormd20150131s5AHcAF16rt23w12r10	11	AF16.42	AF16	23	1/31/15	10	35.64647755	293	462.243333	0.13763288	0.1376444	0.102468139	0
wormd20150131s5AHcAF16rt23w12r11	11	AF16.42	AF16	23	1/31/15	11	36.70770204	293	496.713333	0.13203998	0.13180241	0.102468139	0
wormd20150131s5AHcAF16rt23w12r12	11	AF16.42	AF16	23	1/31/15	12	37.76892653	293	529.54	0.12017717	0.12174307	0.102468139	0
wormd20150131s5AHcAF16rt23w12r13	11	AF16.42	AF16	23	1/31/15	13	38.83015102	293	554.786667	0.11570826	0.11610243	0.102468139	0
wormd20150131s5AHcAF16rt23w12r14	11	AF16.42	AF16	23	1/31/15	14	39.89137551	293	585.59	0.1061101	0.10692602	0.102468139	0
wormd20150131s5AHcAF16rt23w12r15	11	AF16.42	AF16	23	1/31/15	15	40.9526	293	603.33	0.10229467	0.10246814	0.102468139	0
wormd20150131s5AHcAF16rt23w16r00	15	AF16.43	AF16	23	1/31/15	0	25.03423265	292	624.565217	0.52778581	0.69077384	0.031801428	1
wormd20150131s5AHcAF16rt23w16r02	15	AF16.43	AF16	23	1/31/15	2	27.15668163	176	631.404494	0.371425	0.59473075	0.031801428	1
wormd20150131s5AHcAF16rt23w16r03	15	AF16.43	AF16	23	1/31/15	3	28.21790612	129	591.19084	0.33059553	0.58695157	0.031801428	1
wormd20150131s5AHcAF16rt23w16r04	15	AF16.43	AF16	23	1/31/15	4	29.27913061	145	559.547059	0.45542371	0.62670619	0.031801428	1
wormd20150131s5AHcAF16rt23w16r05	15	AF16.43	AF16	23	1/31/15	5	30.3403551	293	619.52	0.45508582	0.67868283	0.031801428	1
wormd20150131s5AHcAF16rt23w16r06	15	AF16.43	AF16	23	1/31/15	6	31.40157959	117	441.262295	0.18439297	0.3795777	0.031801428	1
wormd20150131s5AHcAF16rt23w16r07	15	AF16.43	AF16	23	1/31/15	7	32.46280408	126	591.664122	0.11091125	0.23093085	0.031801428	1
wormd20150131s5AHcAF16rt23w16r13	15	AF16.43	AF16	23	1/31/15	13	38.83015102	237	102.827869	0.03033833	0.03180143	0.031801428	0
wormd20150131s5AHcAF16rt23w17r00	16	AF16.44	AF16	23	1/31/15	0	25.03423265	144	357.37415	0.44066417	0.58027445	0.178519902	1
wormd20150131s5AHcAF16rt23w17r01	16	AF16.44	AF16	23	1/31/15	1	26.09545714	171	422.893258	0.46634829	0.60069289	0.178519902	1
wormd20150131s5AHcAF16rt23w17r07	16	AF16.44	AF16	23	1/31/15	7	32.46280408	158	127.558282	0.29645673	0.30649093	0.178519902	1
wormd20150131s5AHcAF16rt23w17r08	16	AF16.44	AF16	23	1/31/15	8	33.52402857	164	150.377246	0.250892	0.25426081	0.178519902	1
wormd20150131s5AHcAF16rt23w17r09	16	AF16.44	AF16	23	1/31/15	9	34.58525306	163	160.407186	0.23946702	0.24047781	0.178519902	1
wormd20150131s5AHcAF16rt23w17r10	16	AF16.44	AF16	23	1/31/15	10	35.64647755	136	172.553191	0.21813657	0.22478473	0.178519902	1
wormd20150131s5AHcAF16rt23w17r11	16	AF16.44	AF16	23	1/31/15	11	36.70770204	141	179.917241	0.20438229	0.20527879	0.178519902	1
wormd20150131s5AHcAF16rt23w17r12	16	AF16.44	AF16	23	1/31/15	12	37.76892653	180	184.576087	0.19087284	0.19101494	0.178519902	1
wormd20150131s5AHcAF16rt23w17r13	16	AF16.44	AF16	23	1/31/15	13	38.83015102	169	190.017241	0.18594114	0.1838128	0.178519902	1
wormd20150131s5AHcAF16rt23w17r14	16	AF16.44	AF16	23	1/31/15	14	39.89137551	152	198.037736	0.1786414	0.1785199	0.178519902	1
wormd20150131s5AHcAF16rt23w18r00	17	AF16.45	AF16	23	1/31/15	0	25.03423265	167	457.726744	0.51810666	0.59034835	0.090203509	1
wormd20150131s5AHcAF16rt23w18r01	17	AF16.45	AF16	23	1/31/15	1	26.09545714	216	487.618834	0.60971683	0.77294587	0.090203509	1
wormd20150131s5AHcAF16rt23w18r02	17	AF16.45	AF16	23	1/31/15	2	27.15668163	248	457.92126	0.71040207	0.82088631	0.090203509	1
wormd20150131s5AHcAF16rt23w18r03	17	AF16.45	AF16	23	1/31/15	3	28.21790612	211	463.16129	0.64118524	0.77623014	0.090203509	1
wormd20150131s5AHcAF16rt23w18r04	17	AF16.45	AF16	23	1/31/15	4	29.27913061	183	616.979275	0.51660305	0.68469533	0.090203509	1
wormd20150131s5AHcAF16rt23w18r07	17	AF16.45	AF16	23	1/31/15	7	32.46280408	169	552.78453	0.54160508	0.7435704	0.090203509	1
wormd20150131s5AHcAF16rt23w18r08	17	AF16.45	AF16	23	1/31/15	8	33.52402857	282	426.923875	0.52533868	0.66136544	0.090203509	1
wormd20150131s5AHcAF16rt23w18r09	17	AF16.45	AF16	23	1/31/15	9	34.58525306	105	519.949153	0.4693205	0.62486647	0.090203509	1
wormd20150131s5AHcAF16rt23w18r10	17	AF16.45	AF16	23	1/31/15	10	35.64647755	118	499.666667	0.17789391	0.54690731	0.090203509	1
wormd20150131s5AHcAF16rt23w18r11	17	AF16.45	AF16	23	1/31/15	11	36.70770204	293	385.966667	0.09411792	0.09390086	0.090203509	0
wormd20150131s5AHcAF16rt23w18r12	17	AF16.45	AF16	23	1/31/15	12	37.76892653	291	390.724832	0.09041806	0.09071433	0.090203509	0
wormd20150131s5AHcAF16rt23w18r13	17	AF16.45	AF16	23	1/31/15	13	38.83015102	293	382.9	0.09052134	0.09020351	0.090203509	0
wormd20150131s5AHcAF16rt23w18r14	17	AF16.45	AF16	23	1/31/15	14	39.89137551	293	405.373333	0.09033134	0.09082292	0.090203509	0
wormd20150131s8HAabAF16rt23w04r00	3	AF16.46	AF16	23	1/31/15	0	25.03423265	283	458.082759	0.56843184	0.67036933	0.082929567	1
wormd20150131s8HAabAF16rt23w04r01	3	AF16.46	AF16	23	1/31/15	1	26.09545714	103	469.158879	0.47555632	0.65520663	0.082929567	1
wormd20150131s8HAabAF16rt23w04r03	3	AF16.46	AF16	23	1/31/15	3	28.21790612	106	143.714286	0.25875327	0.29490661	0.082929567	1
wormd20150131s8HAabAF16rt23w04r04	3	AF16.46	AF16	23	1/31/15	4	29.27913061	106	485.232143	0.51085803	0.64539172	0.082929567	1
wormd20150131s8HAabAF16rt23w04r06	3	AF16.46	AF16	23	1/31/15	6	31.40157959	110	199.130435	0.19146739	0.26612157	0.082929567	1
wormd20150131s8HAabAF16rt23w04r09	3	AF16.46	AF16	23	1/31/15	9	34.58525306	126	453.156757	0.30673455	0.64268282	0.082929567	1
wormd20150131s8HAabAF16rt23w04r12	3	AF16.46	AF16	23	1/31/15	12	37.76892653	203	395.59058	0.08922696	0.14615002	0.082929567	1
wormd20150131s8HAabAF16rt23w04r13	3	AF16.46	AF16	23	1/31/15	13	38.83015102	293	395.723333	0.08273133	0.08292957	0.082929567	0
wormd20150131s8HAabAF16rt23w04r14	3	AF16.46	AF16	23	1/31/15	14	39.89137551	277	398.748322	0.08245444	0.08362711	0.082929567	0
wormd20150131s8HAabAF16rt23w05r00	4	AF16.47	AF16	23	1/31/15	0	25.03423265	279	664.14433	0.43575736	0.53165534	0.05814189	1
wormd20150131s8HAabAF16rt23w05r01	4	AF16.47	AF16	23	1/31/15	1	26.09545714	142	571.517007	0.33482241	0.48559634	0.05814189	1
wormd20150131s8HAabAF16rt23w05r02	4	AF16.47	AF16	23	1/31/15	2	27.15668163	114	644.215517	0.50851595	0.61619241	0.05814189	1
wormd20150131s8HAabAF16rt23w05r06	4	AF16.47	AF16	23	1/31/15	6	31.40157959	119	689.410377	0.35701126	0.55433927	0.05814189	1
wormd20150131s8HAabAF16rt23w05r07	4	AF16.47	AF16	23	1/31/15	7	32.46280408	211	651.274074	0.30495164	0.56687714	0.05814189	1
wormd20150131s8HAabAF16rt23w05r08	4	AF16.47	AF16	23	1/31/15	8	33.52402857	244	752.734266	0.10417957	0.16361775	0.05814189	1
wormd20150131s8HAabAF16rt23w05r09	4	AF16.47	AF16	23	1/31/15	9	34.58525306	293	656.3	0.06422904	0.11543117	0.05814189	0
wormd20150131s8HAabAF16rt23w05r10	4	AF16.47	AF16	23	1/31/15	10	35.64647755	227	787.286207	0.05797647	0.05814189	0.05814189	0
wormd20150131s8HAabAF16rt23w05r11	4	AF16.47	AF16	23	1/31/15	11	36.70770204	293	774.263333	0.0588834	0.05956617	0.05814189	0
wormd20150131s8HAabAF16rt23w05r12	4	AF16.47	AF16	23	1/31/15	12	37.76892653	293	744.083333	0.05970175	0.06232583	0.05814189	0
wormd20150131s8HAabAF16rt23w05r13	4	AF16.47	AF16	23	1/31/15	13	38.83015102	293	663.04	0.0600988	0.06008331	0.05814189	0
wormd20150131s8HAabAF16rt23w05r14	4	AF16.47	AF16	23	1/31/15	14	39.89137551	293	669.716667	0.06010983	0.06040942	0.05814189	0
wormd20150131s8HAabAF16rt23w05r15	4	AF16.47	AF16	23	1/31/15	15	40.9526	293	659.943333	0.06333155	0.0630674	0.05814189	0
wormd20150131s8HAabAF16rt23w06r00	5	AF16.48	AF16	23	1/31/15	0	25.03423265	263	536.866667	0.46090317	0.5072844	0.075807149	1
wormd20150131s8HAabAF16rt23w06r01	5	AF16.48	AF16	23	1/31/15	1	26.09545714	196	581.338308	0.46269861	0.58429283	0.075807149	1
wormd20150131s8HAabAF16rt23w06r03	5	AF16.48	AF16	23	1/31/15	3	28.21790612	113	512.717949	0.48627829	0.55745599	0.075807149	1
wormd20150131s8HAabAF16rt23w06r04	5	AF16.48	AF16	23	1/31/15	4	29.27913061	139	525.967532	0.46371294	0.59714588	0.075807149	1
wormd20150131s8HAabAF16rt23w06r05	5	AF16.48	AF16	23	1/31/15	5	30.3403551	225	461.486957	0.61933047	0.77640542	0.075807149	1
wormd20150131s8HAabAF16rt23w06r06	5	AF16.48	AF16	23	1/31/15	6	31.40157959	121	182.409091	0.12016117	0.14878293	0.075807149	1
wormd20150131s8HAabAF16rt23w06r07	5	AF16.48	AF16	23	1/31/15	7	32.46280408	277	532.869718	0.61741314	0.75677004	0.075807149	1
wormd20150131s8HAabAF16rt23w06r08	5	AF16.48	AF16	23	1/31/15	8	33.52402857	114	517.067485	0.26816416	0.48194306	0.075807149	1
wormd20150131s8HAabAF16rt23w06r09	5	AF16.48	AF16	23	1/31/15	9	34.58525306	171	496.75	0.29385767	0.56110475	0.075807149	1
wormd20150131s8HAabAF16rt23w06r10	5	AF16.48	AF16	23	1/31/15	10	35.64647755	293	531.013333	0.0874433	0.20459407	0.075807149	1
wormd20150131s8HAabAF16rt23w06r11	5	AF16.48	AF16	23	1/31/15	11	36.70770204	293	595.603333	0.08594876	0.15764411	0.075807149	1
wormd20150131s8HAabAF16rt23w06r12	5	AF16.48	AF16	23	1/31/15	12	37.76892653	293	464.663333	0.08371861	0.09901487	0.075807149	0
wormd20150131s8HAabAF16rt23w06r13	5	AF16.48	AF16	23	1/31/15	13	38.83015102	293	453.56	0.07525818	0.07580715	0.075807149	0
wormd20150131s8HAabAF16rt23w06r14	5	AF16.48	AF16	23	1/31/15	14	39.89137551	293	496.143333	0.08024379	0.08040383	0.075807149	0
wormd20150131s8HAabAF16rt23w06r15	5	AF16.48	AF16	23	1/31/15	15	40.9526	262	447.414384	0.08652817	0.08731896	0.075807149	0
wormd20150131s8HAabAF16rt23w10r00	9	AF16.49	AF16	23	1/31/15	0	25.03423265	287	510.608844	0.42285003	0.51153487	0.134806663	1
wormd20150131s8HAabAF16rt23w10r09	9	AF16.49	AF16	23	1/31/15	9	34.58525306	290	493.387205	0.19220884	0.49320165	0.134806663	1
wormd20150131s8HAabAF16rt23w10r10	9	AF16.49	AF16	23	1/31/15	10	35.64647755	293	484.873333	0.10875066	0.13480666	0.134806663	0
wormd20150131s8HAabAF16rt23w11r00	10	AF16.50	AF16	23	1/31/15	0	25.03423265	293	456.183333	0.45220775	0.55476773	0.08149079	1
wormd20150131s8HAabAF16rt23w11r09	10	AF16.50	AF16	23	1/31/15	9	34.58525306	293	498.126667	0.08833878	0.14346586	0.08149079	1
wormd20150131s8HAabAF16rt23w11r10	10	AF16.50	AF16	23	1/31/15	10	35.64647755	293	498.066667	0.08398898	0.1341921	0.08149079	0
wormd20150131s8HAabAF16rt23w11r11	10	AF16.50	AF16	23	1/31/15	11	36.70770204	293	411.403333	0.09419527	0.12127942	0.08149079	0
wormd20150131s8HAabAF16rt23w11r12	10	AF16.50	AF16	23	1/31/15	12	37.76892653	293	471.253333	0.07849055	0.08149079	0.08149079	0
wormd20150131s8HAabAF16rt23w11r13	10	AF16.50	AF16	23	1/31/15	13	38.83015102	293	478.776667	0.0845445	0.08444796	0.08149079	0
wormd20150131s8HAabAF16rt23w11r14	10	AF16.50	AF16	23	1/31/15	14	39.89137551	293	479.523333	0.085752	0.08811954	0.08149079	0
wormd20150131s8HAabAF16rt23w11r15	10	AF16.50	AF16	23	1/31/15	15	40.9526	293	459.86	0.08583037	0.08538116	0.08149079	0
wormd20150131s8HAabAF16rt23w15r00	15	AF16.51	AF16	23	1/31/15	0	25.03423265	293	474.003333	0.42212631	0.54932112	0.08725479	1
wormd20150131s8HAabAF16rt23w15r01	15	AF16.51	AF16	23	1/31/15	1	26.09545714	159	439.807229	0.41987632	0.5720641	0.08725479	1
wormd20150131s8HAabAF16rt23w15r03	15	AF16.51	AF16	23	1/31/15	3	28.21790612	293	504.166667	0.39734075	0.581842	0.08725479	1
wormd20150131s8HAabAF16rt23w15r12	15	AF16.51	AF16	23	1/31/15	12	37.76892653	143	198.376712	0.10164549	0.10672734	0.08725479	0
wormd20150131s8HAabAF16rt23w15r15	15	AF16.51	AF16	23	1/31/15	15	40.9526	215	340.977376	0.08547207	0.08725479	0.08725479	0
wormd20150131s8HAabAF16rt23w16r00	16	AF16.52	AF16	23	1/31/15	0	25.03423265	293	607.236667	0.37991622	0.53023851	0.075270673	1
wormd20150131s8HAabAF16rt23w16r01	16	AF16.52	AF16	23	1/31/15	1	26.09545714	226	635.158537	0.40963092	0.48952242	0.075270673	1
wormd20150131s8HAabAF16rt23w16r02	16	AF16.52	AF16	23	1/31/15	2	27.15668163	205	555.711538	0.41456346	0.50388338	0.075270673	1
wormd20150131s8HAabAF16rt23w16r03	16	AF16.52	AF16	23	1/31/15	3	28.21790612	215	596.253456	0.44267427	0.56820377	0.075270673	1
wormd20150131s8HAabAF16rt23w16r06	16	AF16.52	AF16	23	1/31/15	6	31.40157959	118	551.77027	0.3873051	0.42905952	0.075270673	1
wormd20150131s8HAabAF16rt23w16r07	16	AF16.52	AF16	23	1/31/15	7	32.46280408	164	347.63388	0.21048847	0.22079969	0.075270673	1
wormd20150131s8HAabAF16rt23w16r08	16	AF16.52	AF16	23	1/31/15	8	33.52402857	151	348.522727	0.23767652	0.27728337	0.075270673	1
wormd20150131s8HAabAF16rt23w16r09	16	AF16.52	AF16	23	1/31/15	9	34.58525306	210	578.215768	0.42459071	0.57734398	0.075270673	1
wormd20150131s8HAabAF16rt23w16r10	16	AF16.52	AF16	23	1/31/15	10	35.64647755	293	628.9	0.07493291	0.07599881	0.075270673	0
wormd20150131s8HAabAF16rt23w16r11	16	AF16.52	AF16	23	1/31/15	11	36.70770204	293	660.696667	0.07012939	0.09585034	0.075270673	0
wormd20150131s8HAabAF16rt23w16r12	16	AF16.52	AF16	23	1/31/15	12	37.76892653	293	593.683333	0.07793795	0.07876856	0.075270673	0
wormd20150131s8HAabAF16rt23w16r13	16	AF16.52	AF16	23	1/31/15	13	38.83015102	293	578.426667	0.07667024	0.07670919	0.075270673	0
wormd20150131s8HAabAF16rt23w16r14	16	AF16.52	AF16	23	1/31/15	14	39.89137551	293	588.5	0.07831427	0.07872404	0.075270673	0
wormd20150131s8HAabAF16rt23w16r15	16	AF16.52	AF16	23	1/31/15	15	40.9526	293	602.846667	0.07425893	0.07527067	0.075270673	0
wormd20150131s8HAabAF16rt23w17r00	17	AF16.53	AF16	23	1/31/15	0	25.03423265	244	634.967153	0.39664704	0.47520305	0.08189201	1
wormd20150131s8HAabAF16rt23w17r01	17	AF16.53	AF16	23	1/31/15	1	26.09545714	179	665.868132	0.37088568	0.5629922	0.08189201	1
wormd20150131s8HAabAF16rt23w17r04	17	AF16.53	AF16	23	1/31/15	4	29.27913061	164	62.2631579	0.1651176	0.16650639	0.08189201	1
wormd20150131s8HAabAF16rt23w17r05	17	AF16.53	AF16	23	1/31/15	5	30.3403551	155	64.4925373	0.17041284	0.16956215	0.08189201	1
wormd20150131s8HAabAF16rt23w17r06	17	AF16.53	AF16	23	1/31/15	6	31.40157959	102	80.3202614	0.13072004	0.14243095	0.08189201	1
wormd20150131s8HAabAF16rt23w17r07	17	AF16.53	AF16	23	1/31/15	7	32.46280408	132	365.285714	0.21714705	0.20513232	0.08189201	1
wormd20150131s8HAabAF16rt23w17r08	17	AF16.53	AF16	23	1/31/15	8	33.52402857	107	310.204969	0.14798007	0.11398425	0.08189201	0
wormd20150131s8HAabAF16rt23w17r10	17	AF16.53	AF16	23	1/31/15	10	35.64647755	180	127.304813	0.12437023	0.1261609	0.08189201	0
wormd20150131s8HAabAF16rt23w17r11	17	AF16.53	AF16	23	1/31/15	11	36.70770204	280	509.839721	0.09221323	0.09439758	0.08189201	0
wormd20150131s8HAabAF16rt23w17r12	17	AF16.53	AF16	23	1/31/15	12	37.76892653	290	560.936027	0.08759074	0.08959701	0.08189201	0
wormd20150131s8HAabAF16rt23w17r13	17	AF16.53	AF16	23	1/31/15	13	38.83015102	278	578.340351	0.08287783	0.08201982	0.08189201	0
wormd20150131s8HAabAF16rt23w17r14	17	AF16.53	AF16	23	1/31/15	14	39.89137551	293	592.73	0.08225821	0.08189201	0.08189201	0
wormd20150131s8HAabAF16rt23w17r15	17	AF16.53	AF16	23	1/31/15	15	40.9526	293	543.4	0.08846168	0.08805718	0.08189201	0
wormd20150201s1AF16AF16rt23w01r00	0	AF16.1	AF16	23	2/01/15	0	25.03423265	194	130.228856	0.09162769	0.10010125	0.094841864	0
wormd20150201s1AF16AF16rt23w01r01	0	AF16.1	AF16	23	2/01/15	1	26.09545714	133	133.273381	0.16842717	0.17741901	0.094841864	1
wormd20150201s1AF16AF16rt23w01r05	0	AF16.1	AF16	23	2/01/15	5	30.3403551	121	349.203252	0.68735573	0.82939158	0.094841864	1
wormd20150201s1AF16AF16rt23w01r06	0	AF16.1	AF16	23	2/01/15	6	31.40157959	111	361.830357	0.41040493	0.66677068	0.094841864	1
wormd20150201s1AF16AF16rt23w01r07	0	AF16.1	AF16	23	2/01/15	7	32.46280408	171	193.463277	0.29944732	0.35235011	0.094841864	1
wormd20150201s1AF16AF16rt23w01r08	0	AF16.1	AF16	23	2/01/15	8	33.52402857	152	281.792453	0.39783146	0.48570613	0.094841864	1
wormd20150201s1AF16AF16rt23w01r09	0	AF16.1	AF16	23	2/01/15	9	34.58525306	115	314.991803	0.32440587	0.55687013	0.094841864	1
wormd20150201s1AF16AF16rt23w01r10	0	AF16.1	AF16	23	2/01/15	10	35.64647755	185	304.114583	0.2562995	0.57906019	0.094841864	1
wormd20150201s1AF16AF16rt23w01r11	0	AF16.1	AF16	23	2/01/15	11	36.70770204	196	322.763547	0.13387911	0.38212704	0.094841864	1
wormd20150201s1AF16AF16rt23w01r12	0	AF16.1	AF16	23	2/01/15	12	37.76892653	241	339.625	0.09631192	0.13858646	0.094841864	0
wormd20150201s1AF16AF16rt23w01r13	0	AF16.1	AF16	23	2/01/15	13	38.83015102	265	314.341912	0.09463046	0.09484186	0.094841864	0
wormd20150201s1AF16AF16rt23w01r14	0	AF16.1	AF16	23	2/01/15	14	39.89137551	276	285.226148	0.09612936	0.09520598	0.094841864	0
wormd20150201s1AF16AF16rt23w01r15	0	AF16.1	AF16	23	2/01/15	15	40.9526	293	257.086667	0.10382912	0.1046299	0.094841864	0
wormd20150201s1AF16AF16rt23w02r00	1	AF16.2	AF16	23	2/01/15	0	25.03423265	271	160.184783	0.1752193	0.187255	0.100679773	1
wormd20150201s1AF16AF16rt23w02r02	1	AF16.2	AF16	23	2/01/15	2	27.15668163	112	193.508475	0.21772507	0.30361722	0.100679773	1
wormd20150201s1AF16AF16rt23w02r03	1	AF16.2	AF16	23	2/01/15	3	28.21790612	121	173.265625	0.1932589	0.23294956	0.100679773	1
wormd20150201s1AF16AF16rt23w02r04	1	AF16.2	AF16	23	2/01/15	4	29.27913061	113	217.947826	0.248732	0.36385862	0.100679773	1
wormd20150201s1AF16AF16rt23w02r05	1	AF16.2	AF16	23	2/01/15	5	30.3403551	222	334.367257	0.48566655	0.64861508	0.100679773	1
wormd20150201s1AF16AF16rt23w02r06	1	AF16.2	AF16	23	2/01/15	6	31.40157959	161	90.4478528	0.08623873	0.10067977	0.100679773	0
wormd20150201s1AF16AF16rt23w02r08	1	AF16.2	AF16	23	2/01/15	8	33.52402857	293	389.433333	0.10048047	0.10077718	0.100679773	0
wormd20150201s1AF16AF16rt23w02r09	1	AF16.2	AF16	23	2/01/15	9	34.58525306	293	377.92	0.10557321	0.12042494	0.100679773	0
wormd20150201s1AF16AF16rt23w02r10	1	AF16.2	AF16	23	2/01/15	10	35.64647755	280	334.418118	0.13062855	0.40222025	0.100679773	1
wormd20150201s1AF16AF16rt23w02r11	1	AF16.2	AF16	23	2/01/15	11	36.70770204	293	296.203333	0.10250183	0.12036744	0.100679773	0
wormd20150201s1AF16AF16rt23w02r12	1	AF16.2	AF16	23	2/01/15	12	37.76892653	293	295.313333	0.11037117	0.13518562	0.100679773	0
wormd20150201s1AF16AF16rt23w02r13	1	AF16.2	AF16	23	2/01/15	13	38.83015102	293	304.023333	0.11002456	0.11052954	0.100679773	0
wormd20150201s1AF16AF16rt23w02r14	1	AF16.2	AF16	23	2/01/15	14	39.89137551	116	267.906475	0.10274409	0.10341161	0.100679773	0
wormd20150201s1AF16AF16rt23w03r00	2	AF16.3	AF16	23	2/01/15	0	25.03423265	230	468.757447	0.45603272	0.61056647	0.530865701	1
wormd20150201s1AF16AF16rt23w03r04	2	AF16.3	AF16	23	2/01/15	4	29.27913061	115	442.810345	0.51227062	0.66058017	0.530865701	1
wormd20150201s1AF16AF16rt23w03r06	2	AF16.3	AF16	23	2/01/15	6	31.40157959	125	493.106061	0.52874987	0.70616678	0.530865701	1
wormd20150201s1AF16AF16rt23w03r08	2	AF16.3	AF16	23	2/01/15	8	33.52402857	124	465.095238	0.40277804	0.5308657	0.530865701	1
wormd20150201s1AF16AF16rt23w04r00	3	AF16.4	AF16	23	2/01/15	0	25.03423265	270	519.375451	0.51978065	0.59208764	0.089421372	1
wormd20150201s1AF16AF16rt23w04r08	3	AF16.4	AF16	23	2/01/15	8	33.52402857	232	548.733068	0.31750592	0.5436221	0.089421372	1
wormd20150201s1AF16AF16rt23w04r11	3	AF16.4	AF16	23	2/01/15	11	36.70770204	223	525.462151	0.09501639	0.17144639	0.089421372	1
wormd20150201s1AF16AF16rt23w04r12	3	AF16.4	AF16	23	2/01/15	12	37.76892653	293	514.956667	0.09218805	0.1009636	0.089421372	0
wormd20150201s1AF16AF16rt23w04r13	3	AF16.4	AF16	23	2/01/15	13	38.83015102	293	501.866667	0.09303957	0.09351081	0.089421372	0
wormd20150201s1AF16AF16rt23w04r14	3	AF16.4	AF16	23	2/01/15	14	39.89137551	293	491.47	0.09542875	0.09511317	0.089421372	0
wormd20150201s1AF16AF16rt23w04r15	3	AF16.4	AF16	23	2/01/15	15	40.9526	293	489.923333	0.09131099	0.08942137	0.089421372	0
wormd20150201s1AF16AF16rt23w05r00	4	AF16.5	AF16	23	2/01/15	0	25.03423265	293	468.473333	0.49508923	0.5738037	0.08406373	1
wormd20150201s1AF16AF16rt23w05r01	4	AF16.5	AF16	23	2/01/15	1	26.09545714	177	492.062827	0.58104133	0.70708164	0.08406373	1
wormd20150201s1AF16AF16rt23w05r04	4	AF16.5	AF16	23	2/01/15	4	29.27913061	293	534.836667	0.43919808	0.57725312	0.08406373	1
wormd20150201s1AF16AF16rt23w05r05	4	AF16.5	AF16	23	2/01/15	5	30.3403551	151	528.815789	0.37968349	0.50949469	0.08406373	1
wormd20150201s1AF16AF16rt23w05r09	4	AF16.5	AF16	23	2/01/15	9	34.58525306	257	495.896679	0.25562276	0.56523115	0.08406373	1
wormd20150201s1AF16AF16rt23w05r10	4	AF16.5	AF16	23	2/01/15	10	35.64647755	293	550.956667	0.08256743	0.17827052	0.08406373	1
wormd20150201s1AF16AF16rt23w05r11	4	AF16.5	AF16	23	2/01/15	11	36.70770204	293	500.563333	0.08336771	0.09452706	0.08406373	0
wormd20150201s1AF16AF16rt23w05r12	4	AF16.5	AF16	23	2/01/15	12	37.76892653	290	489.111111	0.08521896	0.10536602	0.08406373	0
wormd20150201s1AF16AF16rt23w05r13	4	AF16.5	AF16	23	2/01/15	13	38.83015102	285	475.462329	0.08357731	0.08406373	0.08406373	0
wormd20150201s1AF16AF16rt23w05r14	4	AF16.5	AF16	23	2/01/15	14	39.89137551	287	474.758503	0.08464052	0.08523893	0.08406373	0
wormd20150201s1AF16AF16rt23w05r15	4	AF16.5	AF16	23	2/01/15	15	40.9526	290	441.96633	0.08369397	0.08468303	0.08406373	0
wormd20150201s1AF16AF16rt23w06r00	5	AF16.6	AF16	23	2/01/15	0	25.03423265	289	508.831081	0.44777293	0.56472439	0.089791314	1
wormd20150201s1AF16AF16rt23w06r01	5	AF16.6	AF16	23	2/01/15	1	26.09545714	256	439.106464	0.55498377	0.68227827	0.089791314	1
wormd20150201s1AF16AF16rt23w06r02	5	AF16.6	AF16	23	2/01/15	2	27.15668163	182	394.661376	0.66258775	0.78532877	0.089791314	1
wormd20150201s1AF16AF16rt23w06r03	5	AF16.6	AF16	23	2/01/15	3	28.21790612	184	445.446809	0.53116996	0.71343844	0.089791314	1
wormd20150201s1AF16AF16rt23w06r07	5	AF16.6	AF16	23	2/01/15	7	32.46280408	134	357.6	0.35069557	0.4675459	0.089791314	1
wormd20150201s1AF16AF16rt23w06r09	5	AF16.6	AF16	23	2/01/15	9	34.58525306	289	348.804054	0.31126274	0.63618007	0.089791314	1
wormd20150201s1AF16AF16rt23w06r10	5	AF16.6	AF16	23	2/01/15	10	35.64647755	172	358.943182	0.29446334	0.70112327	0.089791314	1
wormd20150201s1AF16AF16rt23w06r12	5	AF16.6	AF16	23	2/01/15	12	37.76892653	272	371.048443	0.10135447	0.14246903	0.089791314	1
wormd20150201s1AF16AF16rt23w06r13	5	AF16.6	AF16	23	2/01/15	13	38.83015102	293	373.42	0.09724407	0.09784795	0.089791314	0
wormd20150201s1AF16AF16rt23w06r14	5	AF16.6	AF16	23	2/01/15	14	39.89137551	293	371.626667	0.0964016	0.09657388	0.089791314	0
wormd20150201s1AF16AF16rt23w06r15	5	AF16.6	AF16	23	2/01/15	15	40.9526	293	399.586667	0.08997979	0.08979131	0.089791314	0
wormd20150201s1AF16AF16rt23w07r00	6	AF16.7	AF16	23	2/01/15	0	25.03423265	223	362.504348	0.5470476	0.62267057	0.098562643	1
wormd20150201s1AF16AF16rt23w07r01	6	AF16.7	AF16	23	2/01/15	1	26.09545714	194	348.880597	0.54693619	0.69232055	0.098562643	1
wormd20150201s1AF16AF16rt23w07r05	6	AF16.7	AF16	23	2/01/15	5	30.3403551	107	363.522124	0.4929529	0.67069847	0.098562643	1
wormd20150201s1AF16AF16rt23w07r09	6	AF16.7	AF16	23	2/01/15	9	34.58525306	107	308.782857	0.43697642	0.63871265	0.098562643	1
wormd20150201s1AF16AF16rt23w07r10	6	AF16.7	AF16	23	2/01/15	10	35.64647755	293	267.076667	0.09523552	0.09856264	0.098562643	0
wormd20150201s1AF16AF16rt23w07r11	6	AF16.7	AF16	23	2/01/15	11	36.70770204	124	313.550336	0.10731756	0.22852147	0.098562643	1
wormd20150201s1AF16AF16rt23w07r12	6	AF16.7	AF16	23	2/01/15	12	37.76892653	246	260.296443	0.098506	0.10530151	0.098562643	0
wormd20150201s1AF16AF16rt23w07r13	6	AF16.7	AF16	23	2/01/15	13	38.83015102	180	278	0.11173496	0.11167339	0.098562643	0
wormd20150201s1AF16AF16rt23w07r14	6	AF16.7	AF16	23	2/01/15	14	39.89137551	127	254.486667	0.13008593	0.12502215	0.098562643	0
wormd20150201s1AF16AF16rt23w08r00	7	AF16.8	AF16	23	2/01/15	0	25.03423265	235	399.247934	0.48982672	0.56986333	0.080969849	1
wormd20150201s1AF16AF16rt23w08r01	7	AF16.8	AF16	23	2/01/15	1	26.09545714	120	234.620968	0.18988026	0.21629714	0.080969849	1
wormd20150201s1AF16AF16rt23w08r02	7	AF16.8	AF16	23	2/01/15	2	27.15668163	159	433.1875	0.48446982	0.6250281	0.080969849	1
wormd20150201s1AF16AF16rt23w08r04	7	AF16.8	AF16	23	2/01/15	4	29.27913061	110	331.34188	0.29018193	0.3411779	0.080969849	1
wormd20150201s1AF16AF16rt23w08r05	7	AF16.8	AF16	23	2/01/15	5	30.3403551	209	445.652582	0.36089547	0.51652597	0.080969849	1
wormd20150201s1AF16AF16rt23w08r10	7	AF16.8	AF16	23	2/01/15	10	35.64647755	141	363.125541	0.08445306	0.13704453	0.080969849	0
wormd20150201s1AF16AF16rt23w08r11	7	AF16.8	AF16	23	2/01/15	11	36.70770204	137	389.18408	0.0834353	0.13309389	0.080969849	0
wormd20150201s1AF16AF16rt23w08r12	7	AF16.8	AF16	23	2/01/15	12	37.76892653	293	390.593333	0.0875417	0.13339919	0.080969849	0
wormd20150201s1AF16AF16rt23w08r13	7	AF16.8	AF16	23	2/01/15	13	38.83015102	293	409.506667	0.08358886	0.08332822	0.080969849	0
wormd20150201s1AF16AF16rt23w08r14	7	AF16.8	AF16	23	2/01/15	14	39.89137551	293	403.49	0.08186779	0.08096985	0.080969849	0
wormd20150201s1AF16AF16rt23w08r15	7	AF16.8	AF16	23	2/01/15	15	40.9526	293	385.063333	0.08287087	0.08244741	0.080969849	0
wormd20150201s1AF16AF16rt23w09r00	8	AF16.9	AF16	23	2/01/15	0	25.03423265	127	466.310606	0.4628697	0.60135312	0.063847116	1
wormd20150201s1AF16AF16rt23w09r04	8	AF16.9	AF16	23	2/01/15	4	29.27913061	159	611.585366	0.17351859	0.18874156	0.063847116	1
wormd20150201s1AF16AF16rt23w09r06	8	AF16.9	AF16	23	2/01/15	6	31.40157959	124	95.8218391	0.06253938	0.06384712	0.063847116	0
wormd20150201s1AF16AF16rt23w09r15	8	AF16.9	AF16	23	2/01/15	15	40.9526	293	472.1	0.07888669	0.07741837	0.063847116	0
wormd20150201s1AF16AF16rt23w10r00	9	AF16.10	AF16	23	2/01/15	0	25.03423265	284	394.381443	0.49796941	0.61899447	0.106629599	1
wormd20150201s1AF16AF16rt23w10r01	9	AF16.10	AF16	23	2/01/15	1	26.09545714	104	363.638095	0.55903822	0.67547471	0.106629599	1
wormd20150201s1AF16AF16rt23w10r04	9	AF16.10	AF16	23	2/01/15	4	29.27913061	293	505.396667	0.38079198	0.56752617	0.106629599	1
wormd20150201s1AF16AF16rt23w10r05	9	AF16.10	AF16	23	2/01/15	5	30.3403551	133	377.585185	0.55042878	0.67554953	0.106629599	1
wormd20150201s1AF16AF16rt23w10r08	9	AF16.10	AF16	23	2/01/15	8	33.52402857	111	338.610169	0.36366337	0.50722315	0.106629599	1
wormd20150201s1AF16AF16rt23w10r09	9	AF16.10	AF16	23	2/01/15	9	34.58525306	124	403.824	0.29315737	0.60870322	0.106629599	1
wormd20150201s1AF16AF16rt23w10r11	9	AF16.10	AF16	23	2/01/15	11	36.70770204	180	399.516304	0.09010555	0.13806652	0.106629599	0
wormd20150201s1AF16AF16rt23w10r12	9	AF16.10	AF16	23	2/01/15	12	37.76892653	282	351.138408	0.10292791	0.12001898	0.106629599	0
wormd20150201s1AF16AF16rt23w10r13	9	AF16.10	AF16	23	2/01/15	13	38.83015102	293	355.603333	0.10783316	0.10691403	0.106629599	0
wormd20150201s1AF16AF16rt23w10r14	9	AF16.10	AF16	23	2/01/15	14	39.89137551	293	347.11	0.11009198	0.10984264	0.106629599	0
wormd20150201s1AF16AF16rt23w10r15	9	AF16.10	AF16	23	2/01/15	15	40.9526	293	335.126667	0.10825017	0.1066296	0.106629599	0
wormd20150201s1AF16AF16rt23w11r00	10	AF16.11	AF16	23	2/01/15	0	25.03423265	293	544.42	0.46387004	0.56846671	0.099558589	1
wormd20150201s1AF16AF16rt23w11r01	10	AF16.11	AF16	23	2/01/15	1	26.09545714	167	516.89418	0.44862075	0.67110754	0.099558589	1
wormd20150201s1AF16AF16rt23w11r04	10	AF16.11	AF16	23	2/01/15	4	29.27913061	175	240.072222	0.14086491	0.22995302	0.099558589	1
wormd20150201s1AF16AF16rt23w11r05	10	AF16.11	AF16	23	2/01/15	5	30.3403551	245	274.539683	0.12509786	0.15923764	0.099558589	1
wormd20150201s1AF16AF16rt23w11r06	10	AF16.11	AF16	23	2/01/15	6	31.40157959	277	288.753521	0.11703655	0.12373598	0.099558589	0
wormd20150201s1AF16AF16rt23w11r07	10	AF16.11	AF16	23	2/01/15	7	32.46280408	289	311.087838	0.11780014	0.11680141	0.099558589	0
wormd20150201s1AF16AF16rt23w11r08	10	AF16.11	AF16	23	2/01/15	8	33.52402857	293	341.573333	0.10494794	0.10493913	0.099558589	0
wormd20150201s1AF16AF16rt23w11r09	10	AF16.11	AF16	23	2/01/15	9	34.58525306	291	344.097315	0.10097672	0.10239193	0.099558589	0
wormd20150201s1AF16AF16rt23w11r10	10	AF16.11	AF16	23	2/01/15	10	35.64647755	291	348.926174	0.10006018	0.10202616	0.099558589	0
wormd20150201s1AF16AF16rt23w11r11	10	AF16.11	AF16	23	2/01/15	11	36.70770204	277	332.020619	0.09866642	0.10269651	0.099558589	0
wormd20150201s1AF16AF16rt23w11r12	10	AF16.11	AF16	23	2/01/15	12	37.76892653	267	320.829861	0.10194906	0.10994301	0.099558589	0
wormd20150201s1AF16AF16rt23w11r13	10	AF16.11	AF16	23	2/01/15	13	38.83015102	256	306.290102	0.09774841	0.10161174	0.099558589	0
wormd20150201s1AF16AF16rt23w11r14	10	AF16.11	AF16	23	2/01/15	14	39.89137551	195	291.584507	0.09756711	0.09955859	0.099558589	0
wormd20150201s1AF16AF16rt23w11r15	10	AF16.11	AF16	23	2/01/15	15	40.9526	148	288.363971	0.09707668	0.10017206	0.099558589	0
wormd20150201s1AF16AF16rt23w12r00	11	AF16.12	AF16	23	2/01/15	0	25.03423265	293	479.283333	0.44227831	0.58672807	0.097983601	1
wormd20150201s1AF16AF16rt23w12r01	11	AF16.12	AF16	23	2/01/15	1	26.09545714	278	454.894737	0.53888817	0.66608988	0.097983601	1
wormd20150201s1AF16AF16rt23w12r04	11	AF16.12	AF16	23	2/01/15	4	29.27913061	202	244.124402	0.19096524	0.21011601	0.097983601	1
wormd20150201s1AF16AF16rt23w12r05	11	AF16.12	AF16	23	2/01/15	5	30.3403551	269	310.789855	0.17093498	0.17181803	0.097983601	1
wormd20150201s1AF16AF16rt23w12r06	11	AF16.12	AF16	23	2/01/15	6	31.40157959	265	367.345588	0.16384244	0.16379998	0.097983601	1
wormd20150201s1AF16AF16rt23w12r07	11	AF16.12	AF16	23	2/01/15	7	32.46280408	293	425.69	0.14291474	0.14125118	0.097983601	1
wormd20150201s1AF16AF16rt23w12r08	11	AF16.12	AF16	23	2/01/15	8	33.52402857	293	524.84	0.14119634	0.13794776	0.097983601	0
wormd20150201s1AF16AF16rt23w12r09	11	AF16.12	AF16	23	2/01/15	9	34.58525306	290	608.700337	0.13420888	0.13491211	0.097983601	0
wormd20150201s1AF16AF16rt23w12r10	11	AF16.12	AF16	23	2/01/15	10	35.64647755	268	737.01773	0.10601196	0.10709243	0.097983601	0
wormd20150201s1AF16AF16rt23w12r12	11	AF16.12	AF16	23	2/01/15	12	37.76892653	293	425.156667	0.13630218	0.13586844	0.097983601	0
wormd20150201s1AF16AF16rt23w12r13	11	AF16.12	AF16	23	2/01/15	13	38.83015102	293	566.556667	0.09722156	0.0979836	0.097983601	0
wormd20150201s1AF16AF16rt23w13r00	12	AF16.13	AF16	23	2/01/15	0	25.03423265	226	127.751073	0.11842391	0.12315514	0.097726069	0
wormd20150201s1AF16AF16rt23w13r01	12	AF16.13	AF16	23	2/01/15	1	26.09545714	128	343.8	0.35183973	0.44140809	0.097726069	1
wormd20150201s1AF16AF16rt23w13r02	12	AF16.13	AF16	23	2/01/15	2	27.15668163	113	174.136752	0.28252516	0.30828711	0.097726069	1
wormd20150201s1AF16AF16rt23w13r03	12	AF16.13	AF16	23	2/01/15	3	28.21790612	137	125.577465	0.22887494	0.26251613	0.097726069	1
wormd20150201s1AF16AF16rt23w13r04	12	AF16.13	AF16	23	2/01/15	4	29.27913061	245	497.924303	0.49760651	0.67425605	0.097726069	1
wormd20150201s1AF16AF16rt23w13r07	12	AF16.13	AF16	23	2/01/15	7	32.46280408	138	503.613793	0.40494867	0.61867385	0.097726069	1
wormd20150201s1AF16AF16rt23w13r08	12	AF16.13	AF16	23	2/01/15	8	33.52402857	249	544.296443	0.37073479	0.45166547	0.097726069	1
wormd20150201s1AF16AF16rt23w13r11	12	AF16.13	AF16	23	2/01/15	11	36.70770204	270	440.552347	0.1115552	0.18981164	0.097726069	1
wormd20150201s1AF16AF16rt23w13r12	12	AF16.13	AF16	23	2/01/15	12	37.76892653	293	473.853333	0.0965252	0.11524385	0.097726069	0
wormd20150201s1AF16AF16rt23w13r13	12	AF16.13	AF16	23	2/01/15	13	38.83015102	293	488.193333	0.09854526	0.09987417	0.097726069	0
wormd20150201s1AF16AF16rt23w13r14	12	AF16.13	AF16	23	2/01/15	14	39.89137551	293	484.75	0.11462558	0.11488754	0.097726069	0
wormd20150201s1AF16AF16rt23w13r15	12	AF16.13	AF16	23	2/01/15	15	40.9526	293	562.356667	0.09741838	0.09772607	0.097726069	0
wormd20150201s1AF16AF16rt23w14r00	13	AF16.14	AF16	23	2/01/15	0	25.03423265	284	438.256944	0.4698471	0.56844785	0.089589872	1
wormd20150201s1AF16AF16rt23w14r01	13	AF16.14	AF16	23	2/01/15	1	26.09545714	221	488.258929	0.53480429	0.66279853	0.089589872	1
wormd20150201s1AF16AF16rt23w14r02	13	AF16.14	AF16	23	2/01/15	2	27.15668163	135	358.107143	0.4089381	0.52934614	0.089589872	1
wormd20150201s1AF16AF16rt23w14r03	13	AF16.14	AF16	23	2/01/15	3	28.21790612	148	471.751592	0.45957668	0.63053767	0.089589872	1
wormd20150201s1AF16AF16rt23w14r07	13	AF16.14	AF16	23	2/01/15	7	32.46280408	106	493.376812	0.40395236	0.63330524	0.089589872	1
wormd20150201s1AF16AF16rt23w14r09	13	AF16.14	AF16	23	2/01/15	9	34.58525306	285	467.89726	0.14688034	0.33963426	0.089589872	1
wormd20150201s1AF16AF16rt23w14r10	13	AF16.14	AF16	23	2/01/15	10	35.64647755	293	428.66	0.09906462	0.11587089	0.089589872	0
wormd20150201s1AF16AF16rt23w14r11	13	AF16.14	AF16	23	2/01/15	11	36.70770204	291	400.832215	0.09886492	0.12953866	0.089589872	0
wormd20150201s1AF16AF16rt23w14r12	13	AF16.14	AF16	23	2/01/15	12	37.76892653	293	405.18	0.10194523	0.11951969	0.089589872	0
wormd20150201s1AF16AF16rt23w14r13	13	AF16.14	AF16	23	2/01/15	13	38.83015102	289	416.680272	0.09321341	0.09312181	0.089589872	0
wormd20150201s1AF16AF16rt23w14r14	13	AF16.14	AF16	23	2/01/15	14	39.89137551	290	427.585859	0.08966478	0.08972471	0.089589872	0
wormd20150201s1AF16AF16rt23w14r15	13	AF16.14	AF16	23	2/01/15	15	40.9526	293	431.276667	0.08933833	0.08958987	0.089589872	0
wormd20150201s1AF16AF16rt23w15r00	14	AF16.15	AF16	23	2/01/15	0	25.03423265	290	394.818182	0.52826259	0.62528003	0.083309865	1
wormd20150201s1AF16AF16rt23w15r06	14	AF16.15	AF16	23	2/01/15	6	31.40157959	117	399.358209	0.4849959	0.61328695	0.083309865	1
wormd20150201s1AF16AF16rt23w15r10	14	AF16.15	AF16	23	2/01/15	10	35.64647755	293	444.12	0.09288837	0.09843724	0.083309865	0
wormd20150201s1AF16AF16rt23w15r11	14	AF16.15	AF16	23	2/01/15	11	36.70770204	293	449.366667	0.0939078	0.20499293	0.083309865	1
wormd20150201s1AF16AF16rt23w15r12	14	AF16.15	AF16	23	2/01/15	12	37.76892653	293	461.076667	0.0842508	0.10456889	0.083309865	0
wormd20150201s1AF16AF16rt23w15r13	14	AF16.15	AF16	23	2/01/15	13	38.83015102	293	447.45	0.08907342	0.08916262	0.083309865	0
wormd20150201s1AF16AF16rt23w15r14	14	AF16.15	AF16	23	2/01/15	14	39.89137551	293	440.726667	0.08795615	0.08789138	0.083309865	0
wormd20150201s1AF16AF16rt23w15r15	14	AF16.15	AF16	23	2/01/15	15	40.9526	293	436.243333	0.08368701	0.08330987	0.083309865	0
wormd20150201s1AF16AF16rt23w16r00	15	AF16.16	AF16	23	2/01/15	0	25.03423265	265	491.018382	0.49695345	0.67047109	0.663083669	1
wormd20150201s1AF16AF16rt23w16r01	15	AF16.16	AF16	23	2/01/15	1	26.09545714	223	448.427313	0.58982385	0.6751231	0.663083669	1
wormd20150201s1AF16AF16rt23w16r04	15	AF16.16	AF16	23	2/01/15	4	29.27913061	247	465.02381	0.44930647	0.69425422	0.663083669	1
wormd20150201s1AF16AF16rt23w16r05	15	AF16.16	AF16	23	2/01/15	5	30.3403551	208	451.741784	0.51289323	0.66308367	0.663083669	1
wormd20150201s1AF16AF16rt23w17r00	16	AF16.17	AF16	23	2/01/15	0	25.03423265	271	576.630137	0.46967977	0.53153056	0.088688298	1
wormd20150201s1AF16AF16rt23w17r04	16	AF16.17	AF16	23	2/01/15	4	29.27913061	116	176.036232	0.20056752	0.23622822	0.088688298	1
wormd20150201s1AF16AF16rt23w17r05	16	AF16.17	AF16	23	2/01/15	5	30.3403551	192	206.296651	0.16701093	0.19611758	0.088688298	1
wormd20150201s1AF16AF16rt23w17r06	16	AF16.17	AF16	23	2/01/15	6	31.40157959	192	233.47619	0.15318541	0.18923019	0.088688298	1
wormd20150201s1AF16AF16rt23w17r07	16	AF16.17	AF16	23	2/01/15	7	32.46280408	179	266.967391	0.14841054	0.20200994	0.088688298	1
wormd20150201s1AF16AF16rt23w17r08	16	AF16.17	AF16	23	2/01/15	8	33.52402857	172	302.833333	0.13092148	0.1810098	0.088688298	1
wormd20150201s1AF16AF16rt23w17r09	16	AF16.17	AF16	23	2/01/15	9	34.58525306	184	323.587302	0.12331563	0.17979092	0.088688298	1
wormd20150201s1AF16AF16rt23w17r10	16	AF16.17	AF16	23	2/01/15	10	35.64647755	184	372.338624	0.12944503	0.17282312	0.088688298	1
wormd20150201s1AF16AF16rt23w17r11	16	AF16.17	AF16	23	2/01/15	11	36.70770204	215	416.714932	0.13914629	0.17037628	0.088688298	1
wormd20150201s1AF16AF16rt23w17r12	16	AF16.17	AF16	23	2/01/15	12	37.76892653	252	450.699219	0.13086396	0.13898626	0.088688298	0
wormd20150201s1AF16AF16rt23w17r13	16	AF16.17	AF16	23	2/01/15	13	38.83015102	273	478.967857	0.11066362	0.11530164	0.088688298	0
wormd20150201s1AF16AF16rt23w17r14	16	AF16.17	AF16	23	2/01/15	14	39.89137551	292	496.528428	0.09365472	0.09515028	0.088688298	0
wormd20150201s1AF16AF16rt23w17r15	16	AF16.17	AF16	23	2/01/15	15	40.9526	293	509.79	0.08776218	0.0886883	0.088688298	0
wormd20150201s1AF16AF16rt23w18r00	17	AF16.18	AF16	23	2/01/15	0	25.03423265	290	444.148148	0.44570642	0.59571395	0.549064384	1
wormd20150201s1AF16AF16rt23w18r01	17	AF16.18	AF16	23	2/01/15	1	26.09545714	227	438.098291	0.54856784	0.66203855	0.549064384	1
wormd20150201s1AF16AF16rt23w18r02	17	AF16.18	AF16	23	2/01/15	2	27.15668163	127	302.902985	0.58065917	0.67814268	0.549064384	1
wormd20150201s1AF16AF16rt23w18r03	17	AF16.18	AF16	23	2/01/15	3	28.21790612	292	429.0301	0.39880045	0.55499727	0.549064384	1
wormd20150201s1AF16AF16rt23w18r04	17	AF16.18	AF16	23	2/01/15	4	29.27913061	150	492.557692	0.43230569	0.54906438	0.549064384	1
wormd20150201s2AF16HK104rt23w01r00	0	AF16.19	AF16	23	2/01/15	0	25.03423265	277	455.116197	0.46014469	0.55459863	0.138239049	1
wormd20150201s2AF16HK104rt23w01r01	0	AF16.19	AF16	23	2/01/15	1	26.09545714	234	408.518672	0.52821688	0.65129868	0.138239049	1
wormd20150201s2AF16HK104rt23w01r02	0	AF16.19	AF16	23	2/01/15	2	27.15668163	216	423.533632	0.49206649	0.592039	0.138239049	1
wormd20150201s2AF16HK104rt23w01r03	0	AF16.19	AF16	23	2/01/15	3	28.21790612	121	332.258065	0.27818764	0.399795	0.138239049	1
wormd20150201s2AF16HK104rt23w01r04	0	AF16.19	AF16	23	2/01/15	4	29.27913061	225	461.564655	0.38873355	0.49395358	0.138239049	1
wormd20150201s2AF16HK104rt23w01r05	0	AF16.19	AF16	23	2/01/15	5	30.3403551	115	423.198347	0.36343976	0.46620613	0.138239049	1
wormd20150201s2AF16HK104rt23w01r06	0	AF16.19	AF16	23	2/01/15	6	31.40157959	170	442.067797	0.38973392	0.60534542	0.138239049	1
wormd20150201s2AF16HK104rt23w01r08	0	AF16.19	AF16	23	2/01/15	8	33.52402857	196	474.852217	0.22574383	0.56767799	0.138239049	1
wormd20150201s2AF16HK104rt23w01r09	0	AF16.19	AF16	23	2/01/15	9	34.58525306	233	469.60084	0.14504226	0.40107769	0.138239049	1
wormd20150201s2AF16HK104rt23w01r10	0	AF16.19	AF16	23	2/01/15	10	35.64647755	190	429.238342	0.10484788	0.18487915	0.138239049	1
wormd20150201s2AF16HK104rt23w01r11	0	AF16.19	AF16	23	2/01/15	11	36.70770204	198	418.239024	0.12782253	0.17083866	0.138239049	1
wormd20150201s2AF16HK104rt23w01r14	0	AF16.19	AF16	23	2/01/15	14	39.89137551	143	121.966443	0.12401513	0.14953624	0.138239049	1
wormd20150201s2AF16HK104rt23w01r15	0	AF16.19	AF16	23	2/01/15	15	40.9526	111	121.327586	0.1303137	0.13823905	0.138239049	0
wormd20150201s2AF16HK104rt23w02r00	1	AF16.20	AF16	23	2/01/15	0	25.03423265	250	383.55642	0.56605854	0.62377928	0.081687933	1
wormd20150201s2AF16HK104rt23w02r01	1	AF16.20	AF16	23	2/01/15	1	26.09545714	220	368.716814	0.57842799	0.65251065	0.081687933	1
wormd20150201s2AF16HK104rt23w02r02	1	AF16.20	AF16	23	2/01/15	2	27.15668163	241	379.217742	0.52359012	0.52932053	0.081687933	1
wormd20150201s2AF16HK104rt23w02r08	1	AF16.20	AF16	23	2/01/15	8	33.52402857	101	351.063492	0.28971976	0.77383433	0.081687933	1
wormd20150201s2AF16HK104rt23w02r09	1	AF16.20	AF16	23	2/01/15	9	34.58525306	122	319.123377	0.16745741	0.54311863	0.081687933	1
wormd20150201s2AF16HK104rt23w02r10	1	AF16.20	AF16	23	2/01/15	10	35.64647755	293	343.17	0.08187934	0.13733321	0.081687933	0
wormd20150201s2AF16HK104rt23w02r11	1	AF16.20	AF16	23	2/01/15	11	36.70770204	293	331.886667	0.07205776	0.08621623	0.081687933	0
wormd20150201s2AF16HK104rt23w02r12	1	AF16.20	AF16	23	2/01/15	12	37.76892653	293	365.723333	0.08338517	0.10307161	0.081687933	0
wormd20150201s2AF16HK104rt23w02r13	1	AF16.20	AF16	23	2/01/15	13	38.83015102	293	364.403333	0.08485522	0.08285657	0.081687933	0
wormd20150201s2AF16HK104rt23w02r14	1	AF16.20	AF16	23	2/01/15	14	39.89137551	293	351.236667	0.08756353	0.08692326	0.081687933	0
wormd20150201s2AF16HK104rt23w02r15	1	AF16.20	AF16	23	2/01/15	15	40.9526	293	341.56	0.08128193	0.08168793	0.081687933	0
wormd20150201s2AF16HK104rt23w03r00	2	AF16.21	AF16	23	2/01/15	0	25.03423265	250	515.317647	0.44072708	0.60030837	0.085914535	1
wormd20150201s2AF16HK104rt23w03r01	2	AF16.21	AF16	23	2/01/15	1	26.09545714	293	546.976667	0.45993117	0.61125135	0.085914535	1
wormd20150201s2AF16HK104rt23w03r02	2	AF16.21	AF16	23	2/01/15	2	27.15668163	293	544.596667	0.44604825	0.52860694	0.085914535	1
wormd20150201s2AF16HK104rt23w03r03	2	AF16.21	AF16	23	2/01/15	3	28.21790612	230	534.78903	0.40289027	0.51862904	0.085914535	1
wormd20150201s2AF16HK104rt23w03r04	2	AF16.21	AF16	23	2/01/15	4	29.27913061	238	529.444898	0.39317114	0.46279875	0.085914535	1
wormd20150201s2AF16HK104rt23w03r05	2	AF16.21	AF16	23	2/01/15	5	30.3403551	282	574.010381	0.34430786	0.59561558	0.085914535	1
wormd20150201s2AF16HK104rt23w03r06	2	AF16.21	AF16	23	2/01/15	6	31.40157959	225	546.577586	0.29412047	0.59378566	0.085914535	1
wormd20150201s2AF16HK104rt23w03r07	2	AF16.21	AF16	23	2/01/15	7	32.46280408	266	540.571429	0.23890374	0.60754525	0.085914535	1
wormd20150201s2AF16HK104rt23w03r08	2	AF16.21	AF16	23	2/01/15	8	33.52402857	293	527.863333	0.10390285	0.33393785	0.085914535	1
wormd20150201s2AF16HK104rt23w03r09	2	AF16.21	AF16	23	2/01/15	9	34.58525306	137	614.506944	0.16360929	0.5152086	0.085914535	1
wormd20150201s2AF16HK104rt23w03r10	2	AF16.21	AF16	23	2/01/15	10	35.64647755	138	485.641379	0.13770665	0.47657381	0.085914535	1
wormd20150201s2AF16HK104rt23w03r11	2	AF16.21	AF16	23	2/01/15	11	36.70770204	240	482.736842	0.09365496	0.12322637	0.085914535	0
wormd20150201s2AF16HK104rt23w03r12	2	AF16.21	AF16	23	2/01/15	12	37.76892653	293	464.813333	0.08563003	0.08591454	0.085914535	0
wormd20150201s2AF16HK104rt23w03r13	2	AF16.21	AF16	23	2/01/15	13	38.83015102	293	478.033333	0.09458925	0.09308272	0.085914535	0
wormd20150201s2AF16HK104rt23w07r00	6	AF16.22	AF16	23	2/01/15	0	25.03423265	292	476.625418	0.41603391	0.53925001	0.087342161	1
wormd20150201s2AF16HK104rt23w07r01	6	AF16.22	AF16	23	2/01/15	1	26.09545714	290	422.164983	0.45703081	0.53989714	0.087342161	1
wormd20150201s2AF16HK104rt23w07r02	6	AF16.22	AF16	23	2/01/15	2	27.15668163	280	396.191638	0.49154987	0.52260899	0.087342161	1
wormd20150201s2AF16HK104rt23w07r03	6	AF16.22	AF16	23	2/01/15	3	28.21790612	224	422.189427	0.39887938	0.49921685	0.087342161	1
wormd20150201s2AF16HK104rt23w07r04	6	AF16.22	AF16	23	2/01/15	4	29.27913061	179	403.66129	0.32864844	0.43931597	0.087342161	1
wormd20150201s2AF16HK104rt23w07r05	6	AF16.22	AF16	23	2/01/15	5	30.3403551	208	432.948837	0.30845979	0.55915215	0.087342161	1
wormd20150201s2AF16HK104rt23w07r06	6	AF16.22	AF16	23	2/01/15	6	31.40157959	132	436.057554	0.36272103	0.52941118	0.087342161	1
wormd20150201s2AF16HK104rt23w07r07	6	AF16.22	AF16	23	2/01/15	7	32.46280408	164	389.307263	0.24627788	0.64483551	0.087342161	1
wormd20150201s2AF16HK104rt23w07r09	6	AF16.22	AF16	23	2/01/15	9	34.58525306	176	434.677596	0.11530896	0.32476263	0.087342161	1
wormd20150201s2AF16HK104rt23w07r10	6	AF16.22	AF16	23	2/01/15	10	35.64647755	293	474.203333	0.09207817	0.16108602	0.087342161	1
wormd20150201s2AF16HK104rt23w07r11	6	AF16.22	AF16	23	2/01/15	11	36.70770204	293	440.42	0.09678354	0.128057	0.087342161	0
wormd20150201s2AF16HK104rt23w07r12	6	AF16.22	AF16	23	2/01/15	12	37.76892653	293	431.933333	0.08777583	0.08734216	0.087342161	0
wormd20150201s2AF16HK104rt23w07r13	6	AF16.22	AF16	23	2/01/15	13	38.83015102	293	413.15	0.09897163	0.09813818	0.087342161	0
wormd20150201s2AF16HK104rt23w07r14	6	AF16.22	AF16	23	2/01/15	14	39.89137551	293	427.423333	0.09903025	0.0967763	0.087342161	0
wormd20150201s2AF16HK104rt23w07r15	6	AF16.22	AF16	23	2/01/15	15	40.9526	293	406.493333	0.08782021	0.0878911	0.087342161	0
wormd20150201s2AF16HK104rt23w08r00	7	AF16.23	AF16	23	2/01/15	0	25.03423265	171	326.965318	0.3507193	0.41336458	0.029254358	1
wormd20150201s2AF16HK104rt23w08r01	7	AF16.23	AF16	23	2/01/15	1	26.09545714	235	398.078512	0.43390293	0.51035752	0.029254358	1
wormd20150201s2AF16HK104rt23w08r02	7	AF16.23	AF16	23	2/01/15	2	27.15668163	147	351.74026	0.41996528	0.45029005	0.029254358	1
wormd20150201s2AF16HK104rt23w08r03	7	AF16.23	AF16	23	2/01/15	3	28.21790612	142	435.668919	0.41597312	0.57917266	0.029254358	1
wormd20150201s2AF16HK104rt23w08r04	7	AF16.23	AF16	23	2/01/15	4	29.27913061	122	444.117188	0.4389744	0.53435375	0.029254358	1
wormd20150201s2AF16HK104rt23w08r05	7	AF16.23	AF16	23	2/01/15	5	30.3403551	189	440.709184	0.44787242	0.53677394	0.029254358	1
wormd20150201s2AF16HK104rt23w08r06	7	AF16.23	AF16	23	2/01/15	6	31.40157959	290	475.215488	0.35265441	0.70081984	0.029254358	1
wormd20150201s2AF16HK104rt23w08r07	7	AF16.23	AF16	23	2/01/15	7	32.46280408	293	467.693333	0.30053227	0.70993135	0.029254358	1
wormd20150201s2AF16HK104rt23w08r08	7	AF16.23	AF16	23	2/01/15	8	33.52402857	151	327.741935	0.06057502	0.12358387	0.029254358	0
wormd20150201s2AF16HK104rt23w08r10	7	AF16.23	AF16	23	2/01/15	10	35.64647755	200	426.309179	0.07630182	0.1775558	0.029254358	1
wormd20150201s2AF16HK104rt23w08r11	7	AF16.23	AF16	23	2/01/15	11	36.70770204	287	437.431973	0.06836319	0.07822206	0.029254358	0
wormd20150201s2AF16HK104rt23w08r14	7	AF16.23	AF16	23	2/01/15	14	39.89137551	139	72.5972222	0.03012218	0.02925436	0.029254358	0
wormd20150201s2AF16HK104rt23w08r15	7	AF16.23	AF16	23	2/01/15	15	40.9526	293	351.456667	0.07648435	0.07752167	0.029254358	0
wormd20150201s2AF16HK104rt23w09r00	8	AF16.24	AF16	23	2/01/15	0	25.03423265	293	469.73	0.47843317	0.63183509	0.095184706	1
wormd20150201s2AF16HK104rt23w09r01	8	AF16.24	AF16	23	2/01/15	1	26.09545714	150	485.535948	0.43381234	0.51925596	0.095184706	1
wormd20150201s2AF16HK104rt23w09r04	8	AF16.24	AF16	23	2/01/15	4	29.27913061	135	465.478261	0.36750677	0.41869868	0.095184706	1
wormd20150201s2AF16HK104rt23w09r05	8	AF16.24	AF16	23	2/01/15	5	30.3403551	108	432.773481	0.34884188	0.50725882	0.095184706	1
wormd20150201s2AF16HK104rt23w09r08	8	AF16.24	AF16	23	2/01/15	8	33.52402857	234	429.314286	0.14557273	0.28070805	0.095184706	1
wormd20150201s2AF16HK104rt23w09r09	8	AF16.24	AF16	23	2/01/15	9	34.58525306	252	411.672355	0.10115104	0.13380897	0.095184706	0
wormd20150201s2AF16HK104rt23w09r10	8	AF16.24	AF16	23	2/01/15	10	35.64647755	183	410.026667	0.09611362	0.13109822	0.095184706	0
wormd20150201s2AF16HK104rt23w09r11	8	AF16.24	AF16	23	2/01/15	11	36.70770204	286	422.503401	0.09862155	0.18531178	0.095184706	1
wormd20150201s2AF16HK104rt23w09r12	8	AF16.24	AF16	23	2/01/15	12	37.76892653	293	406.886667	0.096459	0.09823523	0.095184706	0
wormd20150201s2AF16HK104rt23w09r13	8	AF16.24	AF16	23	2/01/15	13	38.83015102	293	388.826667	0.10037754	0.09995558	0.095184706	0
wormd20150201s2AF16HK104rt23w09r14	8	AF16.24	AF16	23	2/01/15	14	39.89137551	293	378.47	0.10365353	0.100165	0.095184706	0
wormd20150201s2AF16HK104rt23w09r15	8	AF16.24	AF16	23	2/01/15	15	40.9526	293	389.363333	0.09647248	0.09518471	0.095184706	0
wormd20150201s2AF16HK104rt23w13r00	12	AF16.25	AF16	23	2/01/15	0	25.03423265	157	433.78481	0.36213416	0.43673166	0.063309586	1
wormd20150201s2AF16HK104rt23w13r01	12	AF16.25	AF16	23	2/01/15	1	26.09545714	165	490.011628	0.36693156	0.46329203	0.063309586	1
wormd20150201s2AF16HK104rt23w13r02	12	AF16.25	AF16	23	2/01/15	2	27.15668163	190	504.502538	0.35748296	0.52182469	0.063309586	1
wormd20150201s2AF16HK104rt23w13r03	12	AF16.25	AF16	23	2/01/15	3	28.21790612	191	615.429864	0.3329341	0.49970327	0.063309586	1
wormd20150201s2AF16HK104rt23w13r04	12	AF16.25	AF16	23	2/01/15	4	29.27913061	273	609.528571	0.31795604	0.5188779	0.063309586	1
wormd20150201s2AF16HK104rt23w13r05	12	AF16.25	AF16	23	2/01/15	5	30.3403551	151	619.312217	0.23944461	0.54756788	0.063309586	1
wormd20150201s2AF16HK104rt23w13r06	12	AF16.25	AF16	23	2/01/15	6	31.40157959	292	539.48495	0.30107432	0.67424998	0.063309586	1
wormd20150201s2AF16HK104rt23w13r07	12	AF16.25	AF16	23	2/01/15	7	32.46280408	275	570.578947	0.22401533	0.58579685	0.063309586	1
wormd20150201s2AF16HK104rt23w13r08	12	AF16.25	AF16	23	2/01/15	8	33.52402857	152	546.272152	0.18626745	0.51489468	0.063309586	1
wormd20150201s2AF16HK104rt23w13r09	12	AF16.25	AF16	23	2/01/15	9	34.58525306	120	330.604839	0.0807071	0.28104868	0.063309586	1
wormd20150201s2AF16HK104rt23w13r10	12	AF16.25	AF16	23	2/01/15	10	35.64647755	293	443.816667	0.08597215	0.10343846	0.063309586	0
wormd20150201s2AF16HK104rt23w13r11	12	AF16.25	AF16	23	2/01/15	11	36.70770204	293	398.3	0.09977897	0.09911618	0.063309586	0
wormd20150201s2AF16HK104rt23w13r12	12	AF16.25	AF16	23	2/01/15	12	37.76892653	293	435.193333	0.10827697	0.10915649	0.063309586	0
wormd20150201s2AF16HK104rt23w13r13	12	AF16.25	AF16	23	2/01/15	13	38.83015102	266	650.124542	0.10183588	0.10598834	0.063309586	0
wormd20150201s2AF16HK104rt23w13r14	12	AF16.25	AF16	23	2/01/15	14	39.89137551	287	580.921769	0.07763445	0.07720336	0.063309586	0
wormd20150201s2AF16HK104rt23w13r15	12	AF16.25	AF16	23	2/01/15	15	40.9526	229	679.09322	0.06328769	0.06330959	0.063309586	0
wormd20150201s2AF16HK104rt23w14r00	13	AF16.26	AF16	23	2/01/15	0	25.03423265	276	407.533569	0.53083291	0.6461566	0.085947005	1
wormd20150201s2AF16HK104rt23w14r01	13	AF16.26	AF16	23	2/01/15	1	26.09545714	244	449.199203	0.51391633	0.61198746	0.085947005	1
wormd20150201s2AF16HK104rt23w14r02	13	AF16.26	AF16	23	2/01/15	2	27.15668163	114	319.214876	0.32485463	0.39854469	0.085947005	1
wormd20150201s2AF16HK104rt23w14r03	13	AF16.26	AF16	23	2/01/15	3	28.21790612	184	320.356021	0.3490375	0.40280462	0.085947005	1
wormd20150201s2AF16HK104rt23w14r04	13	AF16.26	AF16	23	2/01/15	4	29.27913061	195	144.420792	0.08231415	0.13609566	0.085947005	0
wormd20150201s2AF16HK104rt23w14r05	13	AF16.26	AF16	23	2/01/15	5	30.3403551	200	342.497585	0.32099725	0.47146395	0.085947005	1
wormd20150201s2AF16HK104rt23w14r06	13	AF16.26	AF16	23	2/01/15	6	31.40157959	196	338.099502	0.1989882	0.46937969	0.085947005	1
wormd20150201s2AF16HK104rt23w14r07	13	AF16.26	AF16	23	2/01/15	7	32.46280408	130	419.786207	0.26509867	0.60969032	0.085947005	1
wormd20150201s2AF16HK104rt23w14r08	13	AF16.26	AF16	23	2/01/15	8	33.52402857	290	446.888889	0.10976783	0.13758461	0.085947005	0
wormd20150201s2AF16HK104rt23w14r09	13	AF16.26	AF16	23	2/01/15	9	34.58525306	286	445.928328	0.11899957	0.23590575	0.085947005	1
wormd20150201s2AF16HK104rt23w14r10	13	AF16.26	AF16	23	2/01/15	10	35.64647755	279	505.322807	0.11040517	0.12921864	0.085947005	0
wormd20150201s2AF16HK104rt23w14r11	13	AF16.26	AF16	23	2/01/15	11	36.70770204	290	393.835017	0.09316128	0.09411642	0.085947005	0
wormd20150201s2AF16HK104rt23w14r12	13	AF16.26	AF16	23	2/01/15	12	37.76892653	290	429.542088	0.09076513	0.09483863	0.085947005	0
wormd20150201s2AF16HK104rt23w14r13	13	AF16.26	AF16	23	2/01/15	13	38.83015102	261	390.731343	0.08589879	0.085947	0.085947005	0
wormd20150201s2AF16HK104rt23w14r14	13	AF16.26	AF16	23	2/01/15	14	39.89137551	256	379.064639	0.09889213	0.10167864	0.085947005	0
wormd20150201s2AF16HK104rt23w14r15	13	AF16.26	AF16	23	2/01/15	15	40.9526	158	410.214724	0.13504399	0.15605909	0.085947005	1
wormd20150201s2AF16HK104rt23w15r00	14	AF16.27	AF16	23	2/01/15	0	25.03423265	283	370.472414	0.55577852	0.62260157	0.098412293	1
wormd20150201s2AF16HK104rt23w15r02	14	AF16.27	AF16	23	2/01/15	2	27.15668163	196	342.221675	0.40763146	0.49724437	0.098412293	1
wormd20150201s2AF16HK104rt23w15r03	14	AF16.27	AF16	23	2/01/15	3	28.21790612	150	150.128205	0.21325501	0.29935573	0.098412293	1
wormd20150201s2AF16HK104rt23w15r04	14	AF16.27	AF16	23	2/01/15	4	29.27913061	142	62.9455782	0.16137279	0.17261479	0.098412293	1
wormd20150201s2AF16HK104rt23w15r05	14	AF16.27	AF16	23	2/01/15	5	30.3403551	184	385.324607	0.33344953	0.71041586	0.098412293	1
wormd20150201s2AF16HK104rt23w15r06	14	AF16.27	AF16	23	2/01/15	6	31.40157959	121	305.5	0.19992306	0.47470468	0.098412293	1
wormd20150201s2AF16HK104rt23w15r07	14	AF16.27	AF16	23	2/01/15	7	32.46280408	206	376.221154	0.25124791	0.67855186	0.098412293	1
wormd20150201s2AF16HK104rt23w15r10	14	AF16.27	AF16	23	2/01/15	10	35.64647755	213	307.486364	0.10622272	0.15390181	0.098412293	1
wormd20150201s2AF16HK104rt23w15r11	14	AF16.27	AF16	23	2/01/15	11	36.70770204	293	284.513333	0.10166766	0.10878899	0.098412293	0
wormd20150201s2AF16HK104rt23w15r12	14	AF16.27	AF16	23	2/01/15	12	37.76892653	293	278.963333	0.10148537	0.10173877	0.098412293	0
wormd20150201s2AF16HK104rt23w15r13	14	AF16.27	AF16	23	2/01/15	13	38.83015102	293	291.536667	0.10627048	0.10477133	0.098412293	0
wormd20150201s2AF16HK104rt23w15r14	14	AF16.27	AF16	23	2/01/15	14	39.89137551	293	309.513333	0.10308175	0.10289075	0.098412293	0
wormd20150201s2AF16HK104rt23w15r15	14	AF16.27	AF16	23	2/01/15	15	40.9526	293	317.29	0.09896223	0.09841229	0.098412293	0
wormd20150201s3AHcAF16rt23w04r00	3	AF16.28	AF16	23	2/01/15	0	25.03423265	228	477.230769	0.51420415	0.57714024	0.059830873	1
wormd20150201s3AHcAF16rt23w04r01	3	AF16.28	AF16	23	2/01/15	1	26.09545714	250	498.287402	0.6132526	0.75073226	0.059830873	1
wormd20150201s3AHcAF16rt23w04r09	3	AF16.28	AF16	23	2/01/15	9	34.58525306	178	478.284483	0.37052995	0.62620495	0.059830873	1
wormd20150201s3AHcAF16rt23w04r10	3	AF16.28	AF16	23	2/01/15	10	35.64647755	218	473.709804	0.08184816	0.21104621	0.059830873	1
wormd20150201s3AHcAF16rt23w04r11	3	AF16.28	AF16	23	2/01/15	11	36.70770204	247	456.750916	0.0728756	0.16747213	0.059830873	1
wormd20150201s3AHcAF16rt23w04r12	3	AF16.28	AF16	23	2/01/15	12	37.76892653	293	457.23	0.05998639	0.05983087	0.059830873	0
wormd20150201s3AHcAF16rt23w04r13	3	AF16.28	AF16	23	2/01/15	13	38.83015102	293	456.73	0.06884392	0.06836692	0.059830873	0
wormd20150201s3AHcAF16rt23w04r14	3	AF16.28	AF16	23	2/01/15	14	39.89137551	293	432.226667	0.07325444	0.07161379	0.059830873	0
wormd20150201s3AHcAF16rt23w04r15	3	AF16.28	AF16	23	2/01/15	15	40.9526	293	422.903333	0.06952818	0.07008558	0.059830873	0
wormd20150201s3AHcAF16rt23w05r00	4	AF16.29	AF16	23	2/01/15	0	25.03423265	158	427.793939	0.33768901	0.40725621	0.077936631	1
wormd20150201s3AHcAF16rt23w05r01	4	AF16.29	AF16	23	2/01/15	1	26.09545714	202	444.024038	0.36476388	0.5048394	0.077936631	1
wormd20150201s3AHcAF16rt23w05r06	4	AF16.29	AF16	23	2/01/15	6	31.40157959	185	516.096939	0.36952048	0.57319554	0.077936631	1
wormd20150201s3AHcAF16rt23w05r07	4	AF16.29	AF16	23	2/01/15	7	32.46280408	259	586.468635	0.39536592	0.60158278	0.077936631	1
wormd20150201s3AHcAF16rt23w05r09	4	AF16.29	AF16	23	2/01/15	9	34.58525306	219	417.706612	0.09006974	0.0965267	0.077936631	0
wormd20150201s3AHcAF16rt23w05r10	4	AF16.29	AF16	23	2/01/15	10	35.64647755	201	472.283186	0.0990842	0.14253754	0.077936631	1
wormd20150201s3AHcAF16rt23w05r11	4	AF16.29	AF16	23	2/01/15	11	36.70770204	265	421.621818	0.10386724	0.11261568	0.077936631	0
wormd20150201s3AHcAF16rt23w05r12	4	AF16.29	AF16	23	2/01/15	12	37.76892653	147	214.107981	0.10957535	0.11623781	0.077936631	0
wormd20150201s3AHcAF16rt23w05r13	4	AF16.29	AF16	23	2/01/15	13	38.83015102	109	244.374408	0.11041446	0.11606391	0.077936631	0
wormd20150201s3AHcAF16rt23w05r15	4	AF16.29	AF16	23	2/01/15	15	40.9526	179	398.57438	0.08004661	0.07793663	0.077936631	0
wormd20150201s3AHcAF16rt23w06r00	5	AF16.30	AF16	23	2/01/15	0	25.03423265	252	518.066929	0.45995636	0.54464841	0.084625929	1
wormd20150201s3AHcAF16rt23w06r01	5	AF16.30	AF16	23	2/01/15	1	26.09545714	207	618.865471	0.39479485	0.54361555	0.084625929	1
wormd20150201s3AHcAF16rt23w06r02	5	AF16.30	AF16	23	2/01/15	2	27.15668163	163	478.783626	0.52821818	0.66054419	0.084625929	1
wormd20150201s3AHcAF16rt23w06r03	5	AF16.30	AF16	23	2/01/15	3	28.21790612	254	557.625	0.48010324	0.66313573	0.084625929	1
wormd20150201s3AHcAF16rt23w06r05	5	AF16.30	AF16	23	2/01/15	5	30.3403551	103	534.918699	0.31871607	0.54138919	0.084625929	1
wormd20150201s3AHcAF16rt23w06r06	5	AF16.30	AF16	23	2/01/15	6	31.40157959	107	203.026786	0.11528976	0.18930466	0.084625929	1
wormd20150201s3AHcAF16rt23w06r07	5	AF16.30	AF16	23	2/01/15	7	32.46280408	224	493.52381	0.53559828	0.65610568	0.084625929	1
wormd20150201s3AHcAF16rt23w06r09	5	AF16.30	AF16	23	2/01/15	9	34.58525306	290	403.737374	0.34640347	0.6844177	0.084625929	1
wormd20150201s3AHcAF16rt23w06r10	5	AF16.30	AF16	23	2/01/15	10	35.64647755	293	446.646667	0.10838773	0.11597006	0.084625929	0
wormd20150201s3AHcAF16rt23w06r11	5	AF16.30	AF16	23	2/01/15	11	36.70770204	293	411.283333	0.09579294	0.10121483	0.084625929	0
wormd20150201s3AHcAF16rt23w06r12	5	AF16.30	AF16	23	2/01/15	12	37.76892653	293	364.986667	0.09507904	0.09576182	0.084625929	0
wormd20150201s3AHcAF16rt23w06r13	5	AF16.30	AF16	23	2/01/15	13	38.83015102	293	370.606667	0.09657658	0.09705984	0.084625929	0
wormd20150201s3AHcAF16rt23w06r14	5	AF16.30	AF16	23	2/01/15	14	39.89137551	293	375.286667	0.10141695	0.10059958	0.084625929	0
wormd20150201s3AHcAF16rt23w06r15	5	AF16.30	AF16	23	2/01/15	15	40.9526	293	458.333333	0.08458101	0.08462593	0.084625929	0
wormd20150201s3AHcAF16rt23w10r00	9	AF16.31	AF16	23	2/01/15	0	25.03423265	130	401.047619	0.20917119	0.31884406	0.086424926	1
wormd20150201s3AHcAF16rt23w10r01	9	AF16.31	AF16	23	2/01/15	1	26.09545714	105	578.361111	0.38070272	0.60516145	0.086424926	1
wormd20150201s3AHcAF16rt23w10r11	9	AF16.31	AF16	23	2/01/15	11	36.70770204	173	562.179894	0.10356199	0.27491518	0.086424926	1
wormd20150201s3AHcAF16rt23w10r12	9	AF16.31	AF16	23	2/01/15	12	37.76892653	293	541.163333	0.08188257	0.10446268	0.086424926	0
wormd20150201s3AHcAF16rt23w10r13	9	AF16.31	AF16	23	2/01/15	13	38.83015102	293	517.846667	0.09024755	0.09064126	0.086424926	0
wormd20150201s3AHcAF16rt23w10r14	9	AF16.31	AF16	23	2/01/15	14	39.89137551	293	528.04	0.08827388	0.08642493	0.086424926	0
wormd20150201s3AHcAF16rt23w11r00	10	AF16.32	AF16	23	2/01/15	0	25.03423265	255	437.860377	0.55715147	0.65867225	0.075480505	1
wormd20150201s3AHcAF16rt23w11r01	10	AF16.32	AF16	23	2/01/15	1	26.09545714	154	436.602484	0.41469052	0.44699845	0.075480505	1
wormd20150201s3AHcAF16rt23w11r03	10	AF16.32	AF16	23	2/01/15	3	28.21790612	106	204.366972	0.31477091	0.33550593	0.075480505	1
wormd20150201s3AHcAF16rt23w11r05	10	AF16.32	AF16	23	2/01/15	5	30.3403551	265	440.602941	0.31786813	0.50154135	0.075480505	1
wormd20150201s3AHcAF16rt23w11r07	10	AF16.32	AF16	23	2/01/15	7	32.46280408	128	491.376712	0.18438973	0.38044939	0.075480505	1
wormd20150201s3AHcAF16rt23w11r10	10	AF16.32	AF16	23	2/01/15	10	35.64647755	136	451.962366	0.08312488	0.23364855	0.075480505	1
wormd20150201s3AHcAF16rt23w11r11	10	AF16.32	AF16	23	2/01/15	11	36.70770204	206	426.557377	0.09088576	0.22633019	0.075480505	1
wormd20150201s3AHcAF16rt23w11r12	10	AF16.32	AF16	23	2/01/15	12	37.76892653	293	462	0.07190731	0.09649705	0.075480505	0
wormd20150201s3AHcAF16rt23w11r13	10	AF16.32	AF16	23	2/01/15	13	38.83015102	293	421.66	0.07730682	0.07667193	0.075480505	0
wormd20150201s3AHcAF16rt23w11r14	10	AF16.32	AF16	23	2/01/15	14	39.89137551	293	405.933333	0.07531628	0.0754805	0.075480505	0
wormd20150201s3AHcAF16rt23w11r15	10	AF16.32	AF16	23	2/01/15	15	40.9526	293	375.646667	0.0795629	0.0780837	0.075480505	0
wormd20150201s3AHcAF16rt23w12r00	11	AF16.33	AF16	23	2/01/15	0	25.03423265	279	569.758741	0.49616372	0.60203444	0.103805426	1
wormd20150201s3AHcAF16rt23w12r01	11	AF16.33	AF16	23	2/01/15	1	26.09545714	115	351.75	0.41774766	0.47029791	0.103805426	1
wormd20150201s3AHcAF16rt23w12r02	11	AF16.33	AF16	23	2/01/15	2	27.15668163	248	530.32549	0.56342674	0.68835943	0.103805426	1
wormd20150201s3AHcAF16rt23w12r03	11	AF16.33	AF16	23	2/01/15	3	28.21790612	145	276.52381	0.25807887	0.32998295	0.103805426	1
wormd20150201s3AHcAF16rt23w12r05	11	AF16.33	AF16	23	2/01/15	5	30.3403551	156	92.8928571	0.19287307	0.19149997	0.103805426	1
wormd20150201s3AHcAF16rt23w12r06	11	AF16.33	AF16	23	2/01/15	6	31.40157959	250	105.875	0.17261457	0.18789361	0.103805426	1
wormd20150201s3AHcAF16rt23w12r07	11	AF16.33	AF16	23	2/01/15	7	32.46280408	204	133.371981	0.16638149	0.21443099	0.103805426	1
wormd20150201s3AHcAF16rt23w12r08	11	AF16.33	AF16	23	2/01/15	8	33.52402857	176	181.118644	0.17044842	0.2169183	0.103805426	1
wormd20150201s3AHcAF16rt23w12r09	11	AF16.33	AF16	23	2/01/15	9	34.58525306	268	238.52	0.12631776	0.13278907	0.103805426	0
wormd20150201s3AHcAF16rt23w12r10	11	AF16.33	AF16	23	2/01/15	10	35.64647755	260	267.676692	0.13244131	0.14400773	0.103805426	1
wormd20150201s3AHcAF16rt23w12r11	11	AF16.33	AF16	23	2/01/15	11	36.70770204	251	304.717054	0.13790865	0.15148734	0.103805426	1
wormd20150201s3AHcAF16rt23w12r12	11	AF16.33	AF16	23	2/01/15	12	37.76892653	260	336.419476	0.14624357	0.15312228	0.103805426	1
wormd20150201s3AHcAF16rt23w12r13	11	AF16.33	AF16	23	2/01/15	13	38.83015102	282	383.276817	0.13811431	0.14042762	0.103805426	1
wormd20150201s3AHcAF16rt23w12r14	11	AF16.33	AF16	23	2/01/15	14	39.89137551	291	405.426174	0.12092088	0.12197229	0.103805426	0
wormd20150201s3AHcAF16rt23w12r15	11	AF16.33	AF16	23	2/01/15	15	40.9526	292	427.561873	0.10372962	0.10380543	0.103805426	0
wormd20150201s3AHcAF16rt23w16r00	15	AF16.34	AF16	23	2/01/15	0	25.03423265	228	463.46383	0.54745374	0.63064771	0.362345273	1
wormd20150201s3AHcAF16rt23w16r01	15	AF16.34	AF16	23	2/01/15	1	26.09545714	134	263.941606	0.2807638	0.36234527	0.362345273	1
wormd20150201s3AHcAF16rt23w16r02	15	AF16.34	AF16	23	2/01/15	2	27.15668163	134	350.978723	0.32249776	0.48413843	0.362345273	1
wormd20150201s3AHcAF16rt23w16r03	15	AF16.34	AF16	23	2/01/15	3	28.21790612	121	447.096774	0.45853449	0.72982007	0.362345273	1
wormd20150201s3AHcAF16rt23w16r04	15	AF16.34	AF16	23	2/01/15	4	29.27913061	255	537.194656	0.55103986	0.71300294	0.362345273	1
wormd20150201s3AHcAF16rt23w16r05	15	AF16.34	AF16	23	2/01/15	5	30.3403551	197	548.162698	0.50708033	0.71106344	0.362345273	1
wormd20150201s3AHcAF16rt23w16r06	15	AF16.34	AF16	23	2/01/15	6	31.40157959	154	525.04142	0.51000421	0.70536512	0.362345273	1
wormd20150201s3AHcAF16rt23w16r07	15	AF16.34	AF16	23	2/01/15	7	32.46280408	108	504.167568	0.43487138	0.72276463	0.362345273	1
wormd20150201s3AHcAF16rt23w16r08	15	AF16.34	AF16	23	2/01/15	8	33.52402857	109	473.245	0.37371022	0.62142103	0.362345273	1
wormd20150201s3AHcAF16rt23w17r00	16	AF16.35	AF16	23	2/01/15	0	25.03423265	210	506.138249	0.44378354	0.51222666	0.070000308	1
wormd20150201s3AHcAF16rt23w17r05	16	AF16.35	AF16	23	2/01/15	5	30.3403551	170	535.010526	0.50839184	0.70908853	0.070000308	1
wormd20150201s3AHcAF16rt23w17r10	16	AF16.35	AF16	23	2/01/15	10	35.64647755	285	518.133779	0.06789457	0.08323168	0.070000308	0
wormd20150201s3AHcAF16rt23w17r11	16	AF16.35	AF16	23	2/01/15	11	36.70770204	293	473.453333	0.08148755	0.10308065	0.070000308	0
wormd20150201s3AHcAF16rt23w17r12	16	AF16.35	AF16	23	2/01/15	12	37.76892653	254	492.11828	0.07429972	0.08860999	0.070000308	0
wormd20150201s3AHcAF16rt23w17r13	16	AF16.35	AF16	23	2/01/15	13	38.83015102	293	486.386667	0.0729354	0.07334693	0.070000308	0
wormd20150201s3AHcAF16rt23w17r14	16	AF16.35	AF16	23	2/01/15	14	39.89137551	293	474.863333	0.07331182	0.07278554	0.070000308	0
wormd20150201s3AHcAF16rt23w17r15	16	AF16.35	AF16	23	2/01/15	15	40.9526	293	480.676667	0.07028349	0.07000031	0.070000308	0
wormd20150201s3AHcAF16rt23w18r00	17	AF16.36	AF16	23	2/01/15	0	25.03423265	293	516.3	0.45880171	0.56277409	0.077928212	1
wormd20150201s3AHcAF16rt23w18r01	17	AF16.36	AF16	23	2/01/15	1	26.09545714	289	467.331081	0.52760067	0.61857379	0.077928212	1
wormd20150201s3AHcAF16rt23w18r02	17	AF16.36	AF16	23	2/01/15	2	27.15668163	293	448.725753	0.59747467	0.70741857	0.077928212	1
wormd20150201s3AHcAF16rt23w18r03	17	AF16.36	AF16	23	2/01/15	3	28.21790612	292	438.772575	0.60199315	0.72653974	0.077928212	1
wormd20150201s3AHcAF16rt23w18r04	17	AF16.36	AF16	23	2/01/15	4	29.27913061	288	475.308475	0.5406613	0.64979358	0.077928212	1
wormd20150201s3AHcAF16rt23w18r05	17	AF16.36	AF16	23	2/01/15	5	30.3403551	290	482.131313	0.49887686	0.67831915	0.077928212	1
wormd20150201s3AHcAF16rt23w18r06	17	AF16.36	AF16	23	2/01/15	6	31.40157959	104	449.268456	0.40142769	0.72429094	0.077928212	1
wormd20150201s3AHcAF16rt23w18r07	17	AF16.36	AF16	23	2/01/15	7	32.46280408	287	571.180272	0.3399534	0.54266422	0.077928212	1
wormd20150201s3AHcAF16rt23w18r08	17	AF16.36	AF16	23	2/01/15	8	33.52402857	242	488.550201	0.17864788	0.43595959	0.077928212	1
wormd20150201s3AHcAF16rt23w18r09	17	AF16.36	AF16	23	2/01/15	9	34.58525306	293	416.21	0.07916267	0.08924363	0.077928212	0
wormd20150201s3AHcAF16rt23w18r10	17	AF16.36	AF16	23	2/01/15	10	35.64647755	293	428.16	0.08090257	0.13301023	0.077928212	0
wormd20150201s3AHcAF16rt23w18r11	17	AF16.36	AF16	23	2/01/15	11	36.70770204	293	411.416667	0.08484014	0.09737824	0.077928212	0
wormd20150201s3AHcAF16rt23w18r12	17	AF16.36	AF16	23	2/01/15	12	37.76892653	293	418.233333	0.0813379	0.08784539	0.077928212	0
wormd20150201s3AHcAF16rt23w18r13	17	AF16.36	AF16	23	2/01/15	13	38.83015102	293	418.38	0.08107303	0.08191261	0.077928212	0
wormd20150201s3AHcAF16rt23w18r14	17	AF16.36	AF16	23	2/01/15	14	39.89137551	293	414.566667	0.08137925	0.07991169	0.077928212	0
wormd20150201s3AHcAF16rt23w18r15	17	AF16.36	AF16	23	2/01/15	15	40.9526	293	406.626667	0.0783267	0.07792821	0.077928212	0
wormd20150201s8HK104AF16rt23w04r00	3	AF16.37	AF16	23	2/01/15	0	25.03423265	237	646.328571	0.51530952	0.63822776	0.076152231	1
wormd20150201s8HK104AF16rt23w04r05	3	AF16.37	AF16	23	2/01/15	5	30.3403551	197	651.033981	0.33681788	0.60067863	0.076152231	1
wormd20150201s8HK104AF16rt23w04r08	3	AF16.37	AF16	23	2/01/15	8	33.52402857	229	625.697959	0.43883483	0.6545944	0.076152231	1
wormd20150201s8HK104AF16rt23w04r09	3	AF16.37	AF16	23	2/01/15	9	34.58525306	158	645.152174	0.2750364	0.63983303	0.076152231	1
wormd20150201s8HK104AF16rt23w04r10	3	AF16.37	AF16	23	2/01/15	10	35.64647755	290	623.225589	0.3296457	0.65768198	0.076152231	1
wormd20150201s8HK104AF16rt23w04r11	3	AF16.37	AF16	23	2/01/15	11	36.70770204	293	571.24	0.0812996	0.11246064	0.076152231	0
wormd20150201s8HK104AF16rt23w04r12	3	AF16.37	AF16	23	2/01/15	12	37.76892653	293	634.56	0.08254463	0.08234226	0.076152231	0
wormd20150201s8HK104AF16rt23w04r13	3	AF16.37	AF16	23	2/01/15	13	38.83015102	293	598.176667	0.08307216	0.08317884	0.076152231	0
wormd20150201s8HK104AF16rt23w04r14	3	AF16.37	AF16	23	2/01/15	14	39.89137551	293	585.796667	0.08394936	0.08368005	0.076152231	0
wormd20150201s8HK104AF16rt23w04r15	3	AF16.37	AF16	23	2/01/15	15	40.9526	282	621.006711	0.07554689	0.07615223	0.076152231	0
wormd20150201s8HK104AF16rt23w05r00	4	AF16.38	AF16	23	2/01/15	0	25.03423265	285	535.869863	0.47656097	0.60540178	0.102527514	1
wormd20150201s8HK104AF16rt23w05r01	4	AF16.38	AF16	23	2/01/15	1	26.09545714	180	530.57754	0.50995221	0.68492171	0.102527514	1
wormd20150201s8HK104AF16rt23w05r04	4	AF16.38	AF16	23	2/01/15	4	29.27913061	167	107.531792	0.286718	0.29765715	0.102527514	1
wormd20150201s8HK104AF16rt23w05r05	4	AF16.38	AF16	23	2/01/15	5	30.3403551	257	132.484733	0.21223484	0.22313937	0.102527514	1
wormd20150201s8HK104AF16rt23w05r06	4	AF16.38	AF16	23	2/01/15	6	31.40157959	277	149.077739	0.18321434	0.18421791	0.102527514	1
wormd20150201s8HK104AF16rt23w05r07	4	AF16.38	AF16	23	2/01/15	7	32.46280408	293	167.973333	0.16765864	0.17063844	0.102527514	1
wormd20150201s8HK104AF16rt23w05r08	4	AF16.38	AF16	23	2/01/15	8	33.52402857	292	180.488294	0.16337856	0.16213228	0.102527514	1
wormd20150201s8HK104AF16rt23w05r09	4	AF16.38	AF16	23	2/01/15	9	34.58525306	293	204.826667	0.13497151	0.13318804	0.102527514	0
wormd20150201s8HK104AF16rt23w05r10	4	AF16.38	AF16	23	2/01/15	10	35.64647755	293	216.366667	0.12850343	0.12929647	0.102527514	0
wormd20150201s8HK104AF16rt23w05r11	4	AF16.38	AF16	23	2/01/15	11	36.70770204	293	231.866667	0.11311239	0.11367315	0.102527514	0
wormd20150201s8HK104AF16rt23w05r12	4	AF16.38	AF16	23	2/01/15	12	37.76892653	293	241.71	0.10704927	0.10640154	0.102527514	0
wormd20150201s8HK104AF16rt23w05r13	4	AF16.38	AF16	23	2/01/15	13	38.83015102	293	253.536667	0.10432611	0.1076264	0.102527514	0
wormd20150201s8HK104AF16rt23w05r14	4	AF16.38	AF16	23	2/01/15	14	39.89137551	293	267.803333	0.10147145	0.10252751	0.102527514	0
wormd20150201s8HK104AF16rt23w05r15	4	AF16.38	AF16	23	2/01/15	15	40.9526	293	282.51	0.10421677	0.10586772	0.102527514	0
wormd20150201s8HK104AF16rt23w06r00	5	AF16.39	AF16	23	2/01/15	0	25.03423265	184	431.507937	0.52415766	0.6482191	0.057620242	1
wormd20150201s8HK104AF16rt23w06r01	5	AF16.39	AF16	23	2/01/15	1	26.09545714	202	374.480769	0.5598106	0.69627202	0.057620242	1
wormd20150201s8HK104AF16rt23w06r02	5	AF16.39	AF16	23	2/01/15	2	27.15668163	133	398.778571	0.41263062	0.57757587	0.057620242	1
wormd20150201s8HK104AF16rt23w06r03	5	AF16.39	AF16	23	2/01/15	3	28.21790612	118	416.064	0.47239109	0.63455012	0.057620242	1
wormd20150201s8HK104AF16rt23w06r05	5	AF16.39	AF16	23	2/01/15	5	30.3403551	145	126.62	0.0526029	0.05762024	0.057620242	0
wormd20150201s8HK104AF16rt23w06r11	5	AF16.39	AF16	23	2/01/15	11	36.70770204	276	377.141343	0.13552281	0.1758576	0.057620242	1
wormd20150201s8HK104AF16rt23w06r12	5	AF16.39	AF16	23	2/01/15	12	37.76892653	225	367.0131	0.14012098	0.15830949	0.057620242	1
wormd20150201s8HK104AF16rt23w06r13	5	AF16.39	AF16	23	2/01/15	13	38.83015102	220	388.875	0.15950463	0.17915163	0.057620242	1
wormd20150201s8HK104AF16rt23w06r14	5	AF16.39	AF16	23	2/01/15	14	39.89137551	292	394.568562	0.13494328	0.13826593	0.057620242	0
[truncated: 6,267 more rows]
